# Supplementary material for: Out-of-sequence DTP and measles vaccinations and child mortality in Guinea-Bissau: a reanalysis
Source: PubMed Central journal article supplement — BMJ Open. 2019 Sep 5;9(9):e024893. doi: 10.1136/bmjopen-2018-024893 (PMC6731924; doi:10.1136/bmjopen-2018-024893), 2019-09-05
Supplement: bmjopen-2018-024893.draft_revisions.pdf [file bmjopen-2018-024893.draft_revisions.pdf]

# BMJ Open

BMJ Open is committed to open peer review. As part of this commitment we make the peer review history of every article we publish publicly available.

When an article is published we post the peer reviewers' comments and the authors' responses online. We also post the versions of the paper that were used during peer review. These are the versions that the peer review comments apply to.

The versions of the paper that follow are the versions that were submitted during the peer review process. They are not the versions of record or the final published versions. They should not be cited or distributed as the published version of this manuscript.

BMJ Open is an open access journal and the full, final, typeset and author-corrected version of record of the manuscript is available on our site with no access controls, subscription charges or pay-per-view fees (<http://bmjopen.bmj.com>).

If you have any questions on BMJ Open's open peer review process please email [info.bmjopen@bmj.com](mailto:info.bmjopen@bmj.com)

# BMJ Open

## Out-of-sequence DTP and measles vaccinations and child mortality in Guinea-Bissau – a reanalysis

|                               |                                                                                                                                                                                            |
|-------------------------------|--------------------------------------------------------------------------------------------------------------------------------------------------------------------------------------------|
| Journal:                      | <i>BMJ Open</i>                                                                                                                                                                            |
| Manuscript ID                 | bmjopen-2018-024893                                                                                                                                                                        |
| Article Type:                 | Research                                                                                                                                                                                   |
| Date Submitted by the Author: | 22-Jun-2018                                                                                                                                                                                |
| Complete List of Authors:     | Thysen, Sanne; Bandim Health Project, Statens Serum Institut ,<br>Rodrigues, Amabelia; Bandim Health Project<br>Aaby, Peter; Bandim Health Project,<br>Fisker, Ane; Bandim Health Project, |
| Keywords:                     | DTP vaccine, Measles vaccine, Child mortality, Vaccine sequence, Non-specific (heterologous) effects of vaccines                                                                           |
|                               |                                                                                                                                                                                            |

SCHOLARONE™  
Manuscripts

Peer Review Only

1  
2  
3  
4 **Out-of-sequence DTP and measles vaccinations and child mortality in Guinea-Bissau – a**  
5 **reanalysis**  
6  
7  
8  
9

10 *Sanne Marie Thysen<sup>a,b,c</sup>, Amabelia Rodrigues<sup>a</sup>, Peter Aaby<sup>a,b</sup>, Ane Bærent Fisker<sup>a,b,d</sup>*  
11  
12  
13

14 <sup>a</sup> Bandim Health Project, INDEPTH Network, Bissau, Guinea-Bissau

15  
16 <sup>b</sup> Research Centre for Vitamins and Vaccines, Bandim Health Project, Statens Serum Institut,  
17 Copenhagen, Denmark

18  
19 <sup>c</sup> Center for Global Health (GloHAU), Aarhus University, Aarhus, Denmark

20  
21 <sup>d</sup> OPEN, Institute of Clinical Research, University of Southern Denmark, Odense, Denmark  
22  
23  
24

25 Authors:

26  
27 Sanne Marie Thysen, [SAMT@SSI.dk](mailto:SAMT@SSI.dk)  
28

29 Amabelia Rodrigues, [a.rodriques@bandim.org](mailto:a.rodriques@bandim.org)  
30

31 Peter Aaby, [p.aaby@bandim.org](mailto:p.aaby@bandim.org)  
32

33  
34 Ane Bærent Fisker, [ABF@SSI.dk](mailto:ABF@SSI.dk)  
35  
36  
37  
38  
39  
40

41 **Corresponding author:** Sanne Marie Thysen, Bandim Health Project, INDEPTH Network,  
42 Apartado 861, 1004 Bissau Codex, Guinea-Bissau; [SAMT@SSI.dk](mailto:SAMT@SSI.dk)  
43  
44  
45

46 **Keywords:** DTP vaccine, measles vaccine, child mortality, vaccine sequence, non-specific  
47 (heterologous) effects of vaccines  
48  
49

50 **Word count:** Abstract: 281, Manuscript: 3403  
51  
52  
53  
54  
55  
56  
57  
58  
59  
60

## Abstract

**Objectives** To assess whether the sequence of diphtheria-tetanus-pertussis vaccine (DTP) and measles vaccine (MV) was associated with child survival in a dataset previously used to assess non-specific effects of DTP and MV without considering sequence of vaccinations.

**Design** Prospective cohort study analysed using the landmark approach.

**Setting** Bandim Health Project's Health and Demographic Surveillance System covering 100 village clusters in rural Guinea-Bissau.

**Participants** Children aged 9-17 months (recommended age of MV) and 18-35 months (recommended age of booster DTP) with vaccination status assessed between April 1991 and April 1996.

**Methods** Using Cox-proportional hazards models with age as underlying time, we compared mortality of children vaccinated out-of-sequence with mortality of children vaccinated in the recommended sequence. The analyses were stratified by sex and village cluster.

**Main outcome measure** Mortality rate ratio (MRR) for out-of-sequence vaccinations compared with in-sequence vaccinations.

**Results** Among 5937 observations in children aged 9-17 months, included in the main analysis, 1590 observations were classified as in-sequence vaccinations (DTP followed by MV), and 1984 observations were out-of-sequence vaccinations (1491 observations: MV with DTP and 493 observations: MV followed by DTP). Out-of-sequence vaccinations were associated with higher mortality than in-sequence vaccinations (MRR 2.10 (95% CI: 1.07-4.11)); the MRR was 2.30 (1.15-4.58) for MV and DTP administered simultaneously and 1.45 (0.50-4.22) for DTP administered after MV). Associations were similar for boys and girls ( $p=0.77$ ). After 18 months, the mortality rate increased and the differential effect of out-of-sequence vaccinations disappeared.

**Conclusion** Out-of-sequence vaccinations may increase child mortality. Hence, sequence of vaccinations should be considered when planning vaccination programmes or introducing new vaccines into the current vaccination schedule.

### Strengths and limitations of this study

- Vaccination status of the children were only updated at the inspection of a vaccination card. Hence, this study used the landmark analyses and thus prevented survival bias
- Misclassification of vaccinations due to the landmark approach would yield conservative estimates
- Booster doses of DTP were not registered before 1996, and we were therefore not able to make any firm conclusions of the effect of booster DTP
- Sensitivity analyses were conducted to limit the effect of vaccinations during follow-up

## Introduction

Child mortality has declined significantly over the last decades.<sup>1</sup> Part of this decline is due to a reduction in preventable childhood diseases much of which is commonly ascribed to vaccines.<sup>2</sup> Vaccines are designed to protect against specific pathogens.<sup>3</sup> However, vaccines may have broader effects aside from the disease-specific protection with the live vaccines stimulating the immune system and reducing mortality by more than can be explained by preventing the target infection.<sup>4-7</sup> Hence, due to beneficial non-specific effects (NSEs) of live vaccines, vaccines may have played an even larger role in the decline of childhood mortality than usually assumed.

Studies from the introduction of the measles vaccine (MV) in the 1970's and 1980's from Asia and Africa showed larger reductions in mortality than could be ascribed to the prevention of measles infection.<sup>8-10</sup> Both observational studies and randomised trials have later confirmed lower mortality among measles-vaccinated children compared with measles-unvaccinated children.<sup>11-13</sup> In 2014, WHO's Strategic Advisory Group of Experts on immunization (SAGE) reviewed the evidence for NSEs of vaccines, and concluded that the evidence for MV was consistent with beneficial NSEs, especially for girls.<sup>7 14</sup>

The introduction of diphtheria-tetanus-pertussis vaccine (DTP) in the 1980's was associated with higher overall mortality, despite the protection against the specific diseases.<sup>15-17</sup> Other studies comparing mortality of DTP-vaccinated children and DTP-unvaccinated children have later confirmed the negative NSEs, especially for girls.<sup>11 18-21</sup> The WHO review of NSEs stated that beneficial or deleterious NSEs of DTP could not be confirmed nor refuted based on the evidence available.<sup>7 14</sup> However, the WHO review included studies with major survival bias; if the meta-analysis is restricted to studies with documentation of vaccination status and prospective follow-up, DTP-vaccinated children had two-fold higher mortality than DTP-unvaccinated children.<sup>22</sup>

Both observational studies<sup>18 20 23-27</sup> and randomised trials<sup>19 28</sup> suggest that the NSEs depends most strongly on the most recent vaccination and that sequence of vaccinations therefore is important. In a meta-analysis of randomised trials comparing inactivated vaccine after medium- or high-titre MV with standard-titre MV after inactivated vaccine, it was found that receiving an inactivated vaccine after a live MV was associated with a mortality rate-ratio (MRR) of 1.38 (95% CI: 1.05-1.83) compared with receiving live MV after an inactivated vaccine, the negative effect being particularly strong for females.<sup>28</sup>

1  
2  
3  
4 In the first study that assessed the effect on mortality of MV and DTP, having received MV vs no  
5 MV was associated with a MRR of 0.48 (0.27-0.87); in contrast having received DTP vs no DTP  
6 was associated with higher mortality (MRR=1.84 (1.10-3.10)).<sup>11</sup> The analysis did not consider  
7 sequence of vaccinations, the potential importance of which had not yet been detected. We took  
8 advantage of this historical dataset<sup>11</sup> to test if sequence of vaccinations was associated with  
9 mortality. The issue is particularly important now because WHO is planning to add several non-live  
10 vaccines to the vaccination schedule,<sup>29</sup> including booster DTP and RTS,S malaria vaccine, and  
11 some will be given after MV.  
12

## 13 **Methods**

### 14 *Setting*

15  
16  
17 Data was collected within the Bandim Health Project's Health and Demographic Surveillance  
18 System (HDSS) in rural Guinea-Bissau. The HDSS was established in 1990 using the Expanded  
19 Programme on Immunizations (EPI) methodology, randomly selecting 20 clusters of 100 women in  
20 each of the five largest health regions. Women of fertile age and their children below 5 years of age  
21 were followed through biannual visits. Women were registered at 14-16 years of age or when they  
22 moved into the village and were followed to death or migration. Newly registered women were  
23 interviewed about their past obstetric history, age, ethnicity and whether they had attended school.  
24 Children were registered during pregnancy or when they moved into the village. Children were  
25 followed until death, migration or 5 years of age.  
26

27  
28 At all visits, vaccination status, nutritional status and vital status were assessed. Vaccination status  
29 was assessed by inspection of a vaccination card. Children with no vaccination card and whose  
30 mother stated that the child had never received any vaccine were considered "unvaccinated". Only  
31 children with ascertained vaccination status (seen vaccination card, confirmed unvaccinated) were  
32 included in the analyses. Nutritional status was assessed by measurement of the child's mid-upper-  
33 arm circumference (MUAC).  
34

### 35 *Vaccination programme and definition of exposure*

36  
37 The vaccination schedule consisted of Bacillus Calmette-Guérin vaccine (BCG) and oral polio  
38 vaccine (OPV) at birth, 3 doses of DTP and OPV at 6, 10 and 14 weeks of age, MV at 9 months of  
39 age and booster doses of DTP and OPV at 18 months of age. The vaccination schedule did not  
40 change during the study period. Vaccinations were provided through the national immunization  
41  
42  
43  
44  
45  
46  
47  
48  
49  
50  
51  
52  
53  
54  
55  
56  
57  
58  
59  
60

1  
2  
3  
4 programme. Systematic registration of DTP and OPV booster doses were only initiated in 1996, and  
5 thus, booster doses were not registered during the study period.  
6

7  
8 Children were divided into 5 groups according to the most recent vaccination(s) at the time their  
9 vaccination card was inspected: One group consisted of children, who were vaccinated in the  
10 recommended sequence, having received MV after DTP (DTP<MV). Two groups were vaccinated  
11 out-of-sequence: Children who had received DTP and MV simultaneously (DTP=MV), and  
12 children who had received DTP after MV (DTP>MV). Two groups had not received MV; children  
13 who had received DTP, but had not received MV (DTP, no MV) and children who had not received  
14 MV nor DTP (no DTP, no MV).  
15  
16  
17  
18

### 19 *Study population*

20  
21  
22 Children aged 9 to 35 months when visited between April 9, 1991 and April 24, 1996 were eligible  
23 for the study. It will be seen in Figure 1 that the mortality rate decline with age as expected in the  
24 beginning, but after 18 months of age the mortality rate started to increase again. The primary  
25 analysis is the age group 9-17 months since this is the period after MV is scheduled and before the  
26 scheduled age of booster dose of DTP. Children aged 18 to 35 months at the time of visit were  
27 included in a secondary analysis since they could have received a booster dose of DTP after their  
28 in-sequence or out-of-sequence vaccinations.  
29  
30  
31  
32

### 33 *Statistical analyses*

34  
35  
36 Baseline characteristics for different vaccination groups were compared using chi<sup>2</sup>-test, Kruskal-  
37 Wallis rank test and one-way ANOVA comparison. We also compared baseline characteristics of  
38 children included in the analyses with children registered in the HDSS, but not included in the  
39 analyses using chi<sup>2</sup>-test, t-test and Wilcoxon ranksum test. MUAC of children was expressed as a z-  
40 score compared with the 2006-WHO growth reference,<sup>30</sup> thus obtaining a standardized measure.  
41  
42  
43  
44

45 Using a Cox-proportional hazards model with age as underlying timescale, we compared mortality  
46 rates of children vaccinated out-of-sequence and children missing MV with the mortality rates of  
47 children vaccinated in-sequence. Children entered the analysis at the date of inspection of the  
48 vaccination card and remained in the analysis until the subsequent village visit, 6 months after the  
49 visit, death or migration, whichever came first. A child could therefore contribute with two non-  
50 overlapping periods if the vaccination status was assessed at more than one visit within the relevant  
51 age range (9 to 17 months). The booster doses of DTP and OPV administered at 18 months of age  
52  
53  
54  
55  
56  
57  
58  
59  
60



1  
2  
3  
4 was not registered consistently and we were therefore not able to account for which children had  
5 received the booster doses; we therefore censored at 18 months of age in the main analysis. The  
6 data was analysed using the landmark approach,<sup>31</sup> in which the child's vaccination status is only  
7 updated when the vaccination status is re-assessed at the next home visit.  
8  
9

10  
11 In a secondary analysis, we assessed the effects of out-of-sequence vaccinations among children  
12 who were eligible for the DTP booster dose. In this analysis, we included children aged 18 to 35  
13 months at the time of visit.  
14

15  
16 Since previous studies have reported sex-differential NSEs, all analyses were stratified by sex and  
17 separate estimates by sex are presented. All analyses were stratified by village cluster, thus  
18 comparing only children from the same community. Available baseline characteristics (Table 1)  
19 were included in the analyses one by one. No variable changed the main estimate by more than 10%  
20 and adjusted estimates are therefore not presented.  
21  
22  
23

24  
25 The original study assessed the effect of MV compared with no MV. To account for sequence of  
26 vaccination, we reinterpreted the NSEs of MV comparing children vaccinated in-sequence with MV  
27 after DTP with children with no MV (DTP, no MV and no DTP, no MV).  
28  
29

### 30 *Sensitivity analyses*

31  
32 Since many children were vaccinated during follow up, we conducted two sensitivity analyses to  
33 limit the effect of vaccines administered during follow-up. In the first sensitivity analysis, we  
34 censored follow-up time at 2 months after entry. In the second sensitivity analysis, we included only  
35 children who had completed three DTP vaccinations and were therefore not eligible for further  
36 doses during follow-up.  
37  
38  
39  
40

### 41 *Ethical considerations*

42  
43 The data was derived from the HDSS routine data collection, which has been ongoing since 1990 in  
44 collaboration with the Ministry of Health in Guinea-Bissau.<sup>11</sup>  
45  
46

### 47 *Patient and public involvement*

48  
49 The communities were involved in locating households, when the HDSS was setup and contributed  
50 information allowing tracing of internal migrants between villages throughout the study period. No  
51 participants were involved in setting the research question or the outcome measure, nor were they  
52 involved in developing plans for recruitment, design, or implementation of the study. No participant  
53  
54  
55  
56  
57  
58  
59  
60

1  
2  
3  
4 was asked to advise on interpretation or writing up the results. The results are disseminated to the  
5 national public health institute. There are no plans to disseminate the results of the research to study  
6 participants or the community.  
7

## 8 9 **Results**

### 10 *Baseline characteristics*

11  
12  
13  
14 Vaccination status was assessed for 4862 children aged 9-17 months contributing with 5956  
15 observations (Figure 1). In addition to the 2536 children not included as their vaccination status was  
16 not assessed, we excluded 18 children corresponding to 19 observations from the analyses. These  
17 were children with unknown date of MV or DTP (8 children, 9 observations), and children who had  
18 received MV, but no DTP (10 children, 10 observations). We compared the distribution of baseline  
19 characteristics between children included in and excluded from the study (Supplementary table 1).  
20 Children excluded differed from the children included in the analyses with respect to age, region of  
21 residence, ethnicity and maternal age, but sex, nutritional status and maternal education did not  
22 differ. We also compared the distribution of baseline characteristics for different vaccination groups  
23 (Table 1). The age of children differed by vaccination group: children with DTP>MV were older  
24 than children who received DTP before or together with MV and children without MV were  
25 younger ( $p<0.0001$ ). Mean MUAC z-scores for all groups were around one standard deviation  
26 below the reference, but children with DTP>MV and no DTP, no MV tended to deviate more from  
27 the WHO reference curve for MUAC compared with the other groups. The distribution of  
28 vaccination groups differed by region and ethnicity. More mothers of children vaccinated out-of-  
29 sequence or with missing MV had never attended school than mothers of children vaccinated in-  
30 sequence. Children vaccinated out-of-sequence had received their most recent vaccine closer to  
31 entry in the analysis (Table 1).  
32  
33  
34  
35  
36  
37  
38  
39  
40  
41  
42

### 43 *Mortality by vaccination group among children aged 9-17 months*

44  
45  
46 Children vaccinated out-of-sequence had higher mortality compared with children vaccinated in-  
47 sequence (MRR: 2.10 (95% CI: 1.07-4.11); DTP=MV: 2.30 (1.15-4.58) and DTP>MV: 1.45 (0.50-  
48 4.22)). Children who had received DTP, but no MV had higher mortality compared with children  
49 vaccinated in-sequence (MRR: 2.57 (1.37-4.83)). Children without DTP and MV had higher  
50 mortality than children vaccinated in-sequence (MRR: 3.04 (1.41-6.55)) (Table 2). The associations  
51 were similar for boys and girls ( $p=0.77$ ). For boys, out-of-sequence vaccinations were associated  
52  
53  
54  
55  
56  
57  
58  
59  
60

1  
2  
3  
4 with a MRR of 1.96 (0.80-4.78); for girls, the MRR was 2.25 (0.81-6.30). DTP without MV was  
5 associated significantly with higher mortality for boys (MRR: 3.41 (1.50-7.77)); mortality for girls  
6 was also higher, but not statistically significant (MRR: 1.67 (0.62-4.50)) (Table 2).  
7

8  
9 We have previously estimated a MRR of 0.48 (0.27-0.87) for MV versus no MV, without taking  
10 sequence of vaccination into consideration<sup>11</sup>. When we examined the NSEs of measles vaccine by  
11 comparing children MV-vaccinated in-sequence with children not MV-vaccinated, we found a  
12 MRR of 0.40 (0.23-0.69) (data not shown).  
13  
14

#### 15 *Mortality by vaccination group among children aged 18 to 35 months*

16  
17 Initially, mortality declined with age as expected (Figure 2). However, in spite of being older, in-  
18 sequence vaccinated children had higher mortality at 18 to 35 months of age (mortality rate (MR):  
19 39.9 per 1000 person years (PYRS)) than children aged 9 to 17 months (MR: 32.6 per 1000 PYRS).  
20 Mortality developed differently with age for children vaccinated in-sequence compared with  
21 children vaccinated out-of-sequence (Figure 3). Since the in-sequence group had high mortality,  
22 there was no real differences in mortality between out-of-sequence and in-sequence vaccinations in  
23 the 18-35 months age group (Supplementary table 2). The MRR for out-of-sequence compared with  
24 in-sequence vaccinated children differed significantly between the age group 9-17 months (Table 2)  
25 and 18-35 months (Supplementary table 2) (test of interactions, p=0.02).  
26  
27  
28  
29  
30  
31  
32

#### 33 *Sensitivity analyses*

34  
35 In the age group 9-17 months at least 20% of children vaccinated out-of-sequence received further  
36 doses of DTP during follow-up, but few children vaccinated in-sequence did (Supplementary table  
37 3). To minimise the effect of vaccinations during follow-up, we conducted two sensitivity analyses.  
38 First, we censored follow-up 2 months after entry since few additional vaccines would be provided  
39 in that time window. This clearly restricted the power, but the trends remained the same: Out-of-  
40 sequence vaccinations were associated with a MRR of 2.51 (0.86-7.35) (Table 3). The estimates  
41 changed more for girls; out-of-sequence vaccinations being associated with an 8-fold higher  
42 mortality for girls (MRR: 7.83 (0.90-67.83)). Second, we restricted the dataset to children who had  
43 received DTP3 and therefore were unlikely to receive additional routine DTP vaccinations during  
44 follow-up (Supplementary table 4). The MRR of out-of-sequence vaccinations compared with in-  
45 sequence vaccinations was 1.85 (0.82-4.16), and the effect was similar for boys and girls (p=0.60)  
46 (Supplementary table 4). For girls, both DTP3=MV and DTP3>MV were associated with higher  
47  
48  
49  
50  
51  
52  
53  
54  
55  
56  
57  
58  
59  
60

1  
2  
3  
4 mortality. For boys, DTP3=MV were associated with higher mortality, whereas DTP3>MV was not  
5 (Supplementary table 4).  
6

## 7 **Discussion**

### 8 *Main findings*

9  
10 Out-of-sequence vaccinations were associated with higher mortality compared with in-sequence  
11 vaccinations. After 18 months, the recommended age of booster DTP vaccination, the general  
12 mortality rate increased and the differential effect of out-of-sequence vaccinations disappeared.  
13  
14

### 15 *Strengths and weaknesses*

16  
17 Using the landmark approach, survival bias was prevented since the vaccination status of the  
18 children were only updated when vaccination status was re-assessed, thereby preventing that  
19 vaccination information was updated for surviving children, but not for dead children. While this  
20 approach does not misclassify observation time dependent on the outcome, the misclassification of  
21 vaccinations during follow-up would yield conservative estimates.<sup>31</sup>  
22  
23

24 Data was collected through the rural HDSS in Guinea-Bissau and vaccination status was based on  
25 the vaccination card being inspected. Vaccinated children, whose vaccination card was not  
26 presented, were not included in the analysis. Mortality as the main outcome is unlikely to be  
27 reported wrongly, and with visits every 6 months, the imprecision in date of death is limited.  
28  
29 Booster doses of DTP were not registered before 1996 and we could not fully explore the effect of  
30 booster DTP in the present cohort. To limit the effect of vaccinations during follow-up, we censored  
31 the main analysis at 18 months of age, when the children were eligible for the DTP booster;  
32 furthermore, we conducted two sensitivity analyses in which we first restricted follow-up to 2  
33 months after entry and second limited the analysis to children who had received three doses of DTP.  
34  
35 The conclusions of the main analysis were robust in these sensitivity analyses. The statistical model  
36 used, only compared children within the same village cluster, thus limiting bias from local  
37 differences such as epidemics, ethnicity, and access to health care. Comparing children across  
38 clusters did not change the conclusions (data not shown).  
39  
40  
41  
42  
43  
44  
45  
46  
47  
48  
49

### 50 *Comparison with other studies*

51  
52 Similar to our study, previous studies have found that out-of-sequence vaccinations are associated  
53 with increased mortality.<sup>24-26 32-34</sup> In the WHO-commissioned review, out-of-sequence vaccinations  
54  
55  
56  
57  
58  
59  
60

1  
2  
3  
4 with DTP and MV were associated with a relative mortality risk of 2.34 (1.57-3.50) compared with  
5 MV after DTP.<sup>7</sup> Hence, the age group 9-17 months in the present study is entirely consistent with  
6 previous studies. Out-of-sequence vaccinations may affect not only mortality but also hospital  
7 admissions; large population-based cohort studies from Denmark found that out-of-sequence  
8 vaccinations of DTP and MV were associated with higher hospitalisation rates.<sup>35 36</sup> To our  
9 knowledge, no study without survival bias has found beneficial effects of out-of-sequence  
10 vaccinations with DTP and MV.  
11  
12  
13  
14

15  
16 The original study assessed the effect of MV compared with no MV and found a MRR of 0.48  
17 (0.27-0.87)<sup>11</sup> not accounting for sequence of vaccination. According to our analyses this has  
18 underestimated the NSEs of MV. When we considered sequence of vaccination and compared  
19 children MV-vaccinated in-sequence with children not MV-vaccinated, we found a MRR of 0.40  
20 (0.23-0.69).  
21  
22  
23

24 The mortality rate usually declines with age.<sup>37</sup> In our study, among children vaccinated in-sequence,  
25 we found higher mortality rate in children aged 18 to 35 months compared with children aged 9 to  
26 17 months (Figure 3). Since mortality did decline with age in the younger age group, we speculate  
27 that DTP booster for which children were eligible at 18 months of age may have contributed to this  
28 pattern just like DTP out-of-sequence with MV was associated with higher mortality.  
29  
30

31 Unfortunately, our data collection tool in the early 1990 did not systematically assess DTP booster  
32 coverage. According to UNICEF figures, the DTP3 coverage was low in 1991-1996 (45-74%),<sup>38</sup>  
33 and we would not expect the coverage of booster DTP to be high. In urban Bissau, where the  
34 coverage for booster DTP was high, we have previously shown a similar increase in mortality after  
35 18 months of age.<sup>5</sup> Thus, DTP booster doses may partly explain the higher mortality among 18-35  
36 months old children, as observed in Gambia and India.<sup>5 34 39</sup>  
37  
38  
39  
40  
41  
42

43 Effects were similar for boys and girls, and overall we found no sex-differential effect of out-of-  
44 sequence vaccinations. However, other studies have found higher female mortality when DTP was  
45 administered after MV<sup>21 39</sup>; for example, high-titre measles vaccine (HTMV) was associated with  
46 higher female mortality and had to be withdrawn because most HTMV recipients had received DTP  
47 after MV.<sup>28</sup> In the present cohort, few children had received DTP after MV and most out-of-  
48 sequence vaccinations were combined administration of DTP and MV. When follow-up was limited  
49 to 2 months, estimates for out-of-sequence changed more for girls than for boys even though the  
50 difference between boys and girls did not reach statistical significance.  
51  
52  
53  
54  
55  
56  
57  
58  
59  
60

### *Interpretation and implications*

We found that out-of-sequence vaccinations were associated with higher mortality both for children with co-administration of DTP and MV, and children with DTP after MV, compared with children vaccinated in-sequence. It could be speculated that out-of-sequence vaccinated children just had higher mortality because they were frail or their mothers less compliant with health services. In the present study, it speaks against the effect being due to an inherent bias that the difference disappeared completely for 18-35 months old children, possibly due to booster DTP. Furthermore, evidence from RCTs of medium and high-titre MV strongly supported that an inactivated vaccine after MV was associated with higher mortality.<sup>28</sup> Thus, sequence of vaccinations is likely to be important for child survival and should be considered when planning, implementing and evaluating the childhood vaccination programmes.

Current vaccination recommendations are based merely on the disease-specific effects of vaccines, often based on surrogate measures of the ability to prevent targeted infections. However, if vaccines alter the susceptibility to other infections this should be considered. Currently, vaccination programmes are evaluated based on vaccination coverage of DTP and MV at 12 months of age, and timeliness or sequence of vaccination is not taken into account. We found that DTP not succeeded by MV was associated with increased mortality and that out-of-sequence vaccinations were associated with higher mortality compared with children vaccinated in-sequence, thus, the current evaluation criteria emphasising DTP3 coverage may not optimise the impact of the vaccination programme on child health. A stronger emphasis should be put on increasing the MV coverage and getting DTPs and MV in the recommended sequence.

A change of emphasis is urgent: WHO is planning to introduce the second year of life platform with several inactivated vaccines (booster DTP, Meningitis A, RTS,S Malaria vaccine).<sup>29</sup> Hence, in the future children may receive inactivated vaccines after live MV at 9 months of age, not only because they deviate from the recommended schedule, but also if they follow the schedule.

### **Conclusion**

Overall, we found that out-of-sequence vaccinations in children were associated with higher mortality compared with children vaccinated in-sequence. Vaccination programmes should monitor the sequence of vaccinations to optimise the overall effect on child survival.

## **Funding**

This work was supported by European Union FP7 support for OPTIMUNISE [Health-F3-2011-261375], and by DANIDA travel grant [grant no. A27607]. The Bandim Health Project received support from the Danish National Research Foundation via Research Center for Vitamins and Vaccines [DNRF108]. The sponsors had no role in designing the study, the data collection, data analysis, data interpretation or writing the paper.

## **Acknowledgments**

We wish to thank all children and mothers contributing with information to the present study. Furthermore, we would like to thank the dedicated staff working at BHP in Guinea-Bissau for the great job they have done regarding data collection, data entry and data cleaning for the present study.

## **Authors' contributions**

SMT, ABF and PA designed the study and planned the analyses. SMT extracted, cleaned and analysed the data. PA supervised the data collection and data entry. SMT drafted the paper with assistance from PA and ABF. All authors read and approved the final manuscript.

## **Copyright**

The Corresponding Author has the right to grant on behalf of all authors and does grant on behalf of all authors, a worldwide license to the Publishers and its licensees in perpetuity, in all forms, formats and media (whether known now or created in the future), to i) publish, reproduce, distribute, display and store the Contribution, ii) translate the Contribution into other languages, create adaptations, reprints, include within collections and create summaries, extracts and/or, abstracts of the Contribution, iii) create any other derivative work(s) based on the Contribution, iv) to exploit all subsidiary rights in the Contribution, v) the inclusion of electronic links from the Contribution to third party material where-ever it may be located; and, vi) license any third party to do any or all of the above.

## **Competing interests**

All authors have completed the ICMJE uniform disclosure form at [www.icmje.org/coi\\_disclosure.pdf](http://www.icmje.org/coi_disclosure.pdf) and declare: no support from any organisation for the submitted work; no financial relationships with any organisations that might have an interest in the submitted

1  
2  
3  
4 work in the previous three years; no other relationships or activities that could appear to have  
5 influenced the submitted work.  
6

### 7 **Data sharing**

8  
9  
10 Data used for analyses in the present study are available from the corresponding author on  
11 reasonable request.  
12

### 13 **Transparency statement**

14  
15  
16 SMT affirms that the manuscript is an honest, accurate, and transparent account of the study being  
17 reported; that no important aspects of the study have been omitted; and that any discrepancies from  
18 the study as originally planned have been explained.  
19  
20  
21  
22  
23  
24  
25  
26  
27  
28  
29  
30  
31  
32  
33  
34  
35  
36  
37  
38  
39  
40  
41  
42  
43  
44  
45  
46  
47  
48  
49  
50  
51  
52  
53  
54  
55  
56  
57  
58  
59  
60



## References

1. Liu L, Oza S, Hogan D, et al. Global, regional, and national causes of under-5 mortality in 2000-15: an updated systematic analysis with implications for the Sustainable Development Goals. *Lancet* 2016;388(10063):3027-35. doi: 10.1016/S0140-6736(16)31593-8
2. Feikin DR, Flannery B, Hamel MJ, et al. Vaccines for children in Low- and Middle-Income Countries. In: Black RE, Laxminarayan R, Temmerman M, et al., eds. *Reproductive, Maternal, Newborn, and Child Health: Disease Control Priorities: World Bank* 2016.
3. Plotkin S. History of vaccination. *Proceedings of the National Academy of Sciences of the United States of America* 2014;111(34):12283-7. doi: 10.1073/pnas.1400472111 [published Online First: 2014/08/20]
4. Benn CS, Netea MG, Selin LK, et al. A small jab - a big effect: nonspecific immunomodulation by vaccines. *Trends in immunology* 2013;34(9):431-9. doi: 10.1016/j.it.2013.04.004
5. Aaby P, Kollmann TR, Benn CS. Nonspecific effects of neonatal and infant vaccination: public-health, immunological and conceptual challenges. *Nature immunology* 2014;15(10):895-9. doi: 10.1038/ni.2961
6. Aaby P, Benn CS. Non-specific and sex-differential effects of routine vaccines: what evidence is needed to take these effects into consideration in low-income countries? *Human vaccines* 2011;7(1):120-4. [published Online First: 2011/02/01]
7. Higgins JP, Soares-Weiser K, Lopez-Lopez JA, et al. Association of BCG, DTP, and measles containing vaccines with childhood mortality: systematic review. *BMJ* 2016;355:i5170. doi: 10.1136/bmj.i5170
8. Aaby P, Samb B, Simondon F, et al. Non-specific beneficial effect of measles immunisation: analysis of mortality studies from developing countries. *BMJ* 1995;311(7003):481-5. [published Online First: 1995/08/19]
9. Desgrees du Lou A, Pison G, Aaby P. Role of immunizations in the recent decline in childhood mortality and the changes in the female/male mortality ratio in rural Senegal. *Am J Epidemiol* 1995;142(6):643-52.
10. Aaby P, Bhuiya A, Nahar L, et al. The survival benefit of measles immunization may not be explained entirely by the prevention of measles disease: a community study from rural Bangladesh. *Int J Epidemiol* 2003;32(1):106-16.
11. Kristensen I, Aaby P, Jensen H. Routine vaccinations and child survival: follow up study in Guinea-Bissau, West Africa. *BMJ* 2000;321(7274):1435-8. [published Online First: 2000/12/09]
12. Fisker AB, Hornshoj L, Rodrigues A, et al. Effects of the introduction of new vaccines in Guinea-Bissau on vaccine coverage, vaccine timeliness, and child survival: an observational study. *The lancet global health* 2014;2(8):e478-87. doi: 10.1016/S2214-109X(14)70274-8 [published Online First: 24-07-2014]
13. Aaby P, Martins CL, Garly ML, et al. Non-specific effects of standard measles vaccine at 4.5 and 9 months of age on childhood mortality: randomised controlled trial. *BMJ* 2010;341:c6495. doi: 10.1136/bmj.c6495 [published Online First: 2010/12/02]
14. World Health Organization. Summary of the SAGE April 2014 meeting 2014 [Available from: [http://www.who.int/immunization/sage/meetings/2014/april/report\\_summary\\_april\\_2014/en/](http://www.who.int/immunization/sage/meetings/2014/april/report_summary_april_2014/en/) accessed 10-04-2014 2014.
15. Aaby P, Jensen H, Gomes J, et al. The introduction of diphtheria-tetanus-pertussis vaccine and child mortality in rural Guinea-Bissau: an observational study. *Int J Epidemiol* 2004;33(2):374-80. doi: 10.1093/ije/dyh005 [published Online First: 2004/04/15]
16. Mogensen SW, Andersen A, Rodrigues A, et al. The Introduction of Diphtheria-Tetanus-Pertussis and Oral Polio Vaccine Among Young Infants in an Urban African Community: A Natural Experiment. *EBioMedicine* 2017;17:192-98. doi: 10.1016/j.ebiom.2017.01.041

17. Aaby P, Mogensén SW, Rodrigues A, et al. Evidence of Increase in Mortality After the Introduction of Diphtheria-Tetanus-Pertussis Vaccine to Children Aged 6-35 Months in Guinea-Bissau: A Time for Reflection? *Front Public Health* 2018;6:79. doi: 10.3389/fpubh.2018.00079 [published Online First: 2018/04/05]
18. Welaga P, Nielsen J, Adjuik M, et al. Non-specific effects of diphtheria-tetanus-pertussis and measles vaccinations? An analysis of surveillance data from Navrongo, Ghana. *Trop Med Int Health* 2012;17(12):1492-505. doi: 10.1111/j.1365-3156.2012.03093.x
19. Agergaard J, Nante E, Poulstrup G, et al. Diphtheria-tetanus-pertussis vaccine administered simultaneously with measles vaccine is associated with increased morbidity and poor growth in girls. A randomised trial from Guinea-Bissau. *Vaccine* 2011;29(3):487-500.
20. Aaby P, Benn C, Nielsen J, et al. Testing the hypothesis that diphtheria-tetanus-pertussis vaccine has negative non-specific and sex-differential effects on child survival in high-mortality countries. *BMJ open* 2012;2(3):e000707. doi: 10.1136/bmjopen-2011-000707 [published Online First: 2012/05/24]
21. Aaby P, Garly ML, Nielsen J, et al. Increased female-male mortality ratio associated with inactivated polio and diphtheria-tetanus-pertussis vaccines: Observations from vaccination trials in Guinea-Bissau. *Pediatr Infect Dis J* 2007;26(3):247-52. doi: 10.1097/01.inf.0000256735.05098.01 [published Online First: 2007/05/09]
22. Aaby P, Ravn H, Benn CS. The WHO Review of the Possible Non-Specific Effects of Diphtheria-Tetanus-Pertussis Vaccine. *Pediatr Infect Dis J* 2016;35(11):1247-57. doi: 10.1097/INF.0000000000001269
23. Benn CS, Aaby P. Diphtheria-tetanus-pertussis vaccination administered after measles vaccine: increased female mortality? *Pediatr Infect Dis J* 2012;31(10):1095-7. doi: 10.1097/INF.0b013e318263135e [published Online First: 2012/06/12]
24. Aaby P, Biai S, Veirum JE, et al. DTP with or after measles vaccination is associated with increased in-hospital mortality in Guinea-Bissau. *Vaccine* 2007;25(7):1265-9. doi: 10.1016/j.vaccine.2006.10.007
25. Aaby P, Jensen H, Samb B, et al. Differences in female-male mortality after high-titre measles vaccine and association with subsequent vaccination with diphtheria-tetanus-pertussis and inactivated poliovirus: reanalysis of West African studies. *Lancet* 2003;361(9376):2183-8. doi: 10.1016/S0140-6736(03)13771-3
26. Fisker AB, Ravn H, Rodrigues A, et al. Co-administration of live measles and yellow fever vaccines and inactivated pentavalent vaccines is associated with increased mortality compared with measles and yellow fever vaccines only. An observational study from Guinea-Bissau. *Vaccine* 2014;32(5):598-605. doi: 10.1016/j.vaccine.2013.11.074
27. Welaga P, Oduro A, Debpuur C, et al. Fewer out-of-sequence vaccinations and reduction of child mortality in Northern Ghana. *Vaccine* 2017;35(18):2496-503. doi: 10.1016/j.vaccine.2017.03.004
28. Aaby P, Ravn H, Benn CS, et al. Randomized Trials Comparing Inactivated Vaccine After Medium- or High-titer Measles Vaccine With Standard Titer Measles Vaccine After Inactivated Vaccine: A Meta-analysis. *Pediatr Infect Dis J* 2016;35(11):1232-41. doi: 10.1097/INF.0000000000001300
29. Meeting of the Strategic Advisory Group of Experts on immunization, April 2016 - conclusions and recommendations. *Wkly Epidemiol Rec* 2016;91(21):266-84. [published Online First: 2016/05/31]
30. World Health Organization. Multicentre Growth Reference Study Group. WHO Child Growth Standards: Length/height-for-age, weight-for-age, weight-for-length, weight-for-height and body mass index-for-age: Methods and development. Geneva: World Health Organisation, 2006.
31. Jensen H, Benn CS, Lisse IM, et al. Survival bias in observational studies of the impact of routine immunizations on childhood survival. *Trop Med Int Health* 2007;12(1):5-14. doi: 10.1111/j.1365-3156.2006.01773.x [published Online First: 2007/01/09]
32. Aaby P, Ibrahim SA, Libman MD, et al. The sequence of vaccinations and increased female mortality after high-titre measles vaccine: trials from rural Sudan and Kinshasa. *Vaccine* 2006;24(15):2764-71. doi: 10.1016/j.vaccine.2006.01.004 [published Online First: 2006/02/07]

- 1  
2  
3  
4 33. Aaby P, Jensen H, Walraven G. Age-specific changes in the female-male mortality ratio related to the  
5 pattern of vaccinations: an observational study from rural Gambia. *Vaccine* 2006;24(22):4701-8.  
6 doi: 10.1016/j.vaccine.2006.03.038 [published Online First: 2006/04/20]  
7  
8 34. Hirve S, Bavdekar A, Juvekar S, et al. Non-specific and sex-differential effects of vaccinations on child  
9 survival in rural western India. *Vaccine* 2012;30(50):7300-8. doi: 10.1016/j.vaccine.2012.09.035  
10  
11 35. Sorup S, Benn CS, Poulsen A, et al. Live vaccine against measles, mumps, and rubella and the risk of  
12 hospital admissions for nontargeted infections. *JAMA* 2014;311(8):826-35. doi:  
13 10.1001/jama.2014.470  
14  
15 36. Sorup S, Benn CS, Poulsen A, et al. Simultaneous vaccination with MMR and DTaP-IPV-Hib and rate of  
16 hospital admissions with any infections: A nationwide register based cohort study. *Vaccine*  
17 2016;34(50):6172-80. doi: doi: 10.1016/j.vaccine.2016.11.005 [published Online First: 2016/11/15]  
18  
19 37. Liu L, Hill K, Oza S, et al. Levels and Causes of Mortality under Age Five Years. In: Black RE, Laxminarayan  
20 R, Temmerman M, et al., eds. Reproductive, Maternal, Newborn, and Child Health: Disease Control  
21 Priorities: World Bank, 2016.  
22  
23 38. UNICEF. 2016 [updated Aug 2016. Available from: [http://data.unicef.org/topic/child-  
24 health/immunization/](http://data.unicef.org/topic/child-health/immunization/) accessed September 29 2016.  
25  
26 39. Krishnan A, Srivastava R, Dwivedi P, et al. Non-specific sex-differential effect of DTP vaccination may  
27 partially explain the excess girl child mortality in Ballabgarh, India. *Trop Med Int Health*  
28 2013;18(11):1329-37. doi: 10.1111/tmi.12192  
29  
30  
31  
32  
33  
34  
35  
36  
37  
38  
39  
40  
41  
42  
43  
44  
45  
46  
47  
48  
49  
50  
51  
52  
53  
54  
55  
56  
57  
58  
59  
60

1  
2  
3  
4 **Figure 1: Flowchart of children included and excluded from the analysis**  
5  
6  
7  
8  
9  
10  
11  
12  
13  
14  
15  
16  
17  
18  
19  
20  
21  
22  
23  
24  
25  
26  
27  
28  
29  
30  
31  
32  
33  
34  
35  
36  
37  
38  
39  
40  
41  
42  
43  
44  
45  
46  
47  
48  
49  
50  
51  
52  
53  
54  
55  
56  
57  
58  
59  
60

For peer review only

1 **Figure 2** Overall mortality rate among children visited between 9 and 35 months of age.  
2  
3  
4

5 Note: The figure plots the unadjusted mortality rates for children with a vaccination card seen between 9-35 months of age.  
6  
7  
8  
9  
10  
11  
12  
13  
14  
15  
16  
17  
18  
19  
20  
21  
22  
23  
24  
25  
26  
27  
28  
29  
30  
31  
32  
33  
34  
35  
36  
37  
38  
39  
40  
41  
42  
43  
44  
45  
46  
47

For peer review only

1 **Figure 3** Mortality rate according to sequence of DTP and MV vaccinations among children visited between 9 and 35 months of age.  
2  
3  
4

5 Note: The figure plots unadjusted mortality rates by vaccination status (in-sequence vs out-of-sequence vaccinations) among children with  
6 a vaccination card seen between 9-35 months of age.  
7  
8  
9  
10  
11  
12  
13  
14  
15  
16  
17  
18  
19  
20  
21  
22  
23  
24  
25  
26  
27  
28  
29  
30  
31  
32  
33  
34  
35  
36  
37  
38  
39  
40  
41  
42  
43  
44  
45  
46  
47

For peer review only

**Table 1 - Baseline characteristics for observations of children (9-17 months old) included in the analyses by vaccination group**

|                                                               | DTP<MV             | DTP=MV           | DTP>MV           | DTP, no MV         | No DTP, no MV      | p-value |
|---------------------------------------------------------------|--------------------|------------------|------------------|--------------------|--------------------|---------|
| Numbers (%)                                                   | 1590 (27)          | 1491 (25)        | 493 (8)          | 1816 (31)          | 547 (9)            |         |
| <b>Sex</b>                                                    |                    |                  |                  |                    |                    | .29     |
| Male (%)                                                      | 834 (52)           | 729 (49)         | 255 (52)         | 931 (51)           | 290 (53)           |         |
| Female (%)                                                    | 756 (48)           | 762 (51)         | 238 (48)         | 885 (49)           | 257 (47)           |         |
| <b>Median age at start of follow-up (interquartile range)</b> | 425 (359 - 484)    | 420 (361 - 488)  | 466 (415 - 510)  | 346 (305 - 411.5)  | 365 (317 - 446)    | <0.0001 |
| <b>MUAC at start of Follow-up</b>                             | -0.93 (1.09)       | -1.09 (1.05)     | -1.16 (1.08)     | -1.09 (1.13)       | -1.13 (1.13)       | <0.0001 |
| <b>Region</b>                                                 |                    |                  |                  |                    |                    | <0.0001 |
| Oio                                                           | 303 (19)           | 337 (23)         | 87 (18)          | 413 (23)           | 167 (31)           |         |
| Biombo                                                        | 405 (25)           | 283 (19)         | 108 (22)         | 386 (21)           | 147 (27)           |         |
| Gabu                                                          | 158 (10)           | 484 (32)         | 184 (37)         | 437 (24)           | 87 (16)            |         |
| Cacheu                                                        | 353 (22)           | 125 (8)          | 37 (8)           | 226 (12)           | 46 (8)             |         |
| Bafata                                                        | 371 (23)           | 262 (18)         | 77 (16)          | 354 (19)           | 100 (18)           |         |
| <b>Ethnicity</b>                                              |                    |                  |                  |                    |                    | <0.0001 |
| Balanta                                                       | 220 (14)           | 179 (12)         | 38 (8)           | 323 (18)           | 177 (33)           |         |
| Pepel                                                         | 338 (21)           | 228 (16)         | 98 (20)          | 316 (18)           | 137 (25)           |         |
| Fula/Mandinca                                                 | 703 (45)           | 921 (63)         | 296 (61)         | 950 (53)           | 183 (34)           |         |
| Manjaco                                                       | 106 (7)            | 44 (3)           | 9 (2)            | 81 (4)             | 25 (5)             |         |
| Other                                                         | 208 (13)           | 96 (7)           | 45 (9)           | 134 (7)            | 18 (3)             |         |
| <b>Median maternal age (interquartile range)</b>              | 25.6 (20.6 - 30.8) | 26 (21.2 - 30.6) | 25.9 (21.3 - 31) | 26.2 (20.8 - 30.9) | 26.8 (21.3 - 31.5) | .05     |
| <b>Education of caretaker</b>                                 |                    |                  |                  |                    |                    | <0.0001 |
| 0 years                                                       | 1290 (81)          | 1302 (87)        | 426 (86)         | 1562 (86)          | 485 (89)           |         |
| 1-4 years                                                     | 198 (12)           | 143 (10)         | 52 (11)          | 179 (10)           | 44 (8)             |         |
| >4 years                                                      | 77 (5)             | 15 (1)           | 6 (1)            | 45 (2)             | 3 (1)              |         |
| <b>Time since MV/ Time since DTP after MV</b>                 | 105 (52 - 169)     | 85 (38 - 154)    | 66 (30 - 108)    | 161 (98 - 238)     | N/A                | <0.0001 |

<sup>1</sup> 503 observations with missing MUAC<sup>2</sup> 64 observations with missing information on ethnicity<sup>3</sup> 63 observations with missing information on maternal age<sup>4</sup> 110 observations with missing information on education of caretaker

Table 2 - Main analysis: Mortality of children visited between 9 and 17 months of age according to vaccination group

| Vaccination status                          | Observations<br>N | MR per 1000<br>PYRS<br>(deaths/PYRS) | MRR<br>(95% CI)         | Boys              |                                      |                         | Girls             |                                      |                          |
|---------------------------------------------|-------------------|--------------------------------------|-------------------------|-------------------|--------------------------------------|-------------------------|-------------------|--------------------------------------|--------------------------|
|                                             |                   |                                      |                         | Observations<br>N | MR per 1000<br>PYRS<br>(deaths/PYRS) | MRR<br>(95% CI)         | Observations<br>N | MR per 1000<br>PYRS<br>(deaths/PYRS) | MRR<br>(95% CI)          |
| DTP < MV                                    | 1590              | 32.6 (16/491)                        | Ref                     | 834               | 34.8 (9/258)                         | Ref                     | 756               | 30.1 (7/232)                         | Ref                      |
| DTP = MV                                    | 1491              | 63.7 (29/455)                        | <b>2.30 (1.15-4.58)</b> | 729               | 63.6 (14/220)                        | 2.08 (0.83-5.26)        | 762               | 63.8 (15/235)                        | 2.50 (0.88-7.12)         |
| DTP > MV                                    | 493               | 43.1 (5/116)                         | 1.45 (0.50-4.22)        | 255               | 51.5 (3/58)                          | 1.48 (0.37-5.88)        | 238               | 34.6 (2/58)                          | 1.38 (0.25-7.52)         |
| DTP, no MV                                  | 1816              | 78.8 (57/723)                        | <b>2.57 (1.37-4.83)</b> | 931               | 102.3 (38/372)                       | <b>3.41 (1.50-7.77)</b> | 885               | 54.1 (19/351)                        | 1.67 (0.62-4.50)         |
| No DTP, no MV                               | 547               | 111.3 (22/198)                       | <b>3.04 (1.41-6.55)</b> | 290               | 95.3 (10/105)                        | 2.77 (0.97-7.97)        | 257               | 129.5 (12/93)                        | <b>3.28 (1.06-10.12)</b> |
| Out-of-sequence<br>vaccinations<br>combined |                   |                                      |                         |                   |                                      |                         |                   |                                      |                          |
| DTP>=MV                                     | 1984              | 59.5 (34/571)                        | <b>2.10 (1.07-4.11)</b> | 984               | 61.1 (17/278)                        | 1.96 (0.80-4.78)        | 1000              | 58.0 (17/293)                        | 2.25 (0.81-6.30)         |

Note: Mortality rate ratios were calculated using Cox proportional hazards models with age as underlying time, stratified by sex and village cluster.



1  
2  
3  
4  
5  
6  
7  
8  
9  
10  
11  
12  
13  
14  
15  
16  
17  
18  
19  
20  
21  
22  
23  
24  
25  
26  
27  
28  
29  
30  
31  
32  
33  
34  
35  
36  
37  
38  
39  
40  
41  
42  
43  
44  
45  
46  
47

**Table 3 - Mortality of children visited between 9 and 18 months of age according to vaccination group with follow up censored at 2 months after entry into the analysis**

| Vaccination status                                     | Observations<br>N | MR per 1000<br>PYRS<br>(deaths/PYRS) | MRR<br>(95% CI)         | Boys              |                                      |                   | Girls             |                                      |                            |
|--------------------------------------------------------|-------------------|--------------------------------------|-------------------------|-------------------|--------------------------------------|-------------------|-------------------|--------------------------------------|----------------------------|
|                                                        |                   |                                      |                         | Observations<br>N | MR per 1000<br>PYRS<br>(deaths/PYRS) | MRR<br>(95% CI)   | Observations<br>N | MR per 1000<br>PYRS<br>(deaths/PYRS) | MRR<br>(95% CI)            |
| DTP < MV                                               | 1590              | 25.8 (6/233)                         | Ref                     | 834               | 32.9 (4/122)                         | Ref               | 756               | 18.0 (2/111)                         | Ref                        |
| DTP = MV                                               | 1491              | 60.5 (13/215)                        | 2.34 (0.77-7.12)        | 729               | 38.2 (4/105)                         | 1.16 (0.27-5.07)  | 762               | 81.8 (9/110)                         | 6.71 (0.77-58.26)          |
| DTP > MV                                               | 493               | 60.4 (4/66)                          | 3.30 (0.77-14.14)       | 255               | 58.8 (2/34)                          | 1.61 (0.26-10.18) | 238               | 62.1 (2/32)                          | <b>14.61 (1.01-210.68)</b> |
| DTP, no MV                                             | 1816              | 93.4 (27/289)                        | <b>3.47 (1.24-9.69)</b> | 931               | 127.8 (19/149)                       | 2.56 (0.80-8.24)  | 885               | 57.0 (8/140)                         | 6.34 (0.72-55.92)          |
| No DTP, no MV                                          | 547               | 130.3 (11/84)                        | 3.35 (1.00-11.26)       | 290               | 88.6 (4/45)                          | 1.19 (0.24-5.90)  | 257               | 178.3 (7/39)                         | <b>14.73 (1.55-140.27)</b> |
| Out-of-sequence<br>vaccinations<br>combined<br>DTP>=MV | 1984              | 60.5 (17/281)                        | 2.51 (0.86-7.35)        | 984               | 43.2 (6/139)                         | 1.26 (0.32-4.85)  | 1000              | 77.4 (11/142)                        | 7.83 (0.90-67.83)          |

Note: Mortality rate ratios were calculated using Cox proportional hazards models with age as underlying time, stratified by sex and village cluster.

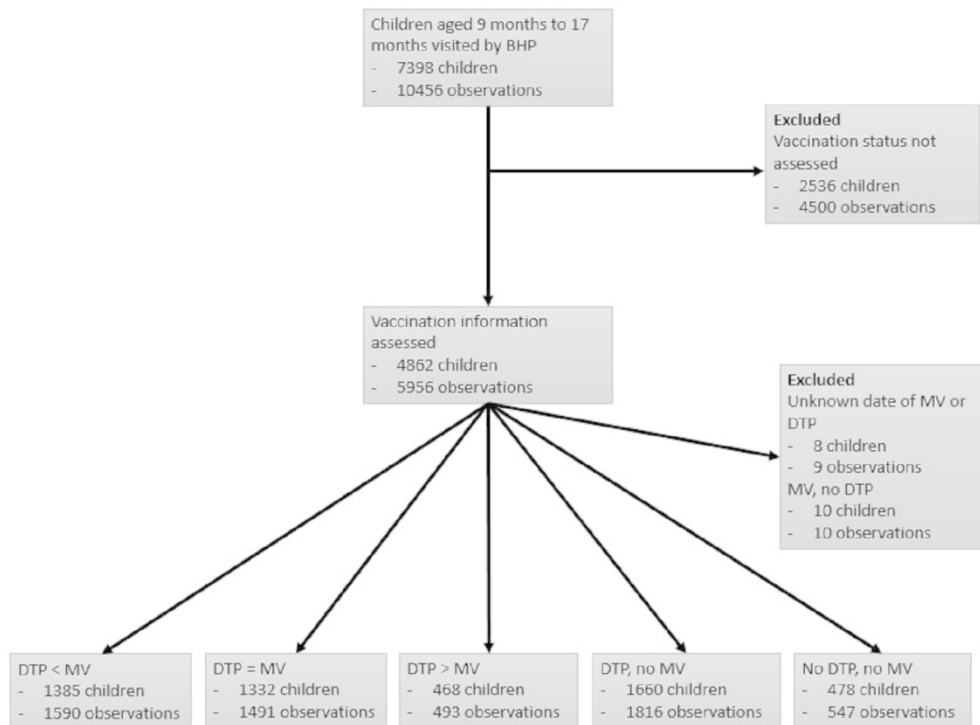

Flowchart of children included and excluded from the analysis

127x93mm (300 x 300 DPI)

1  
2  
3  
4  
5  
6  
7  
8  
9  
10  
11  
12  
13  
14  
15  
16  
17  
18  
19  
20  
21  
22  
23  
24  
25  
26  
27  
28  
29  
30  
31  
32  
33  
34  
35  
36  
37  
38  
39  
40  
41  
42  
43  
44  
45  
46  
47  
48  
49  
50  
51  
52  
53  
54  
55  
56  
57  
58  
59  
60

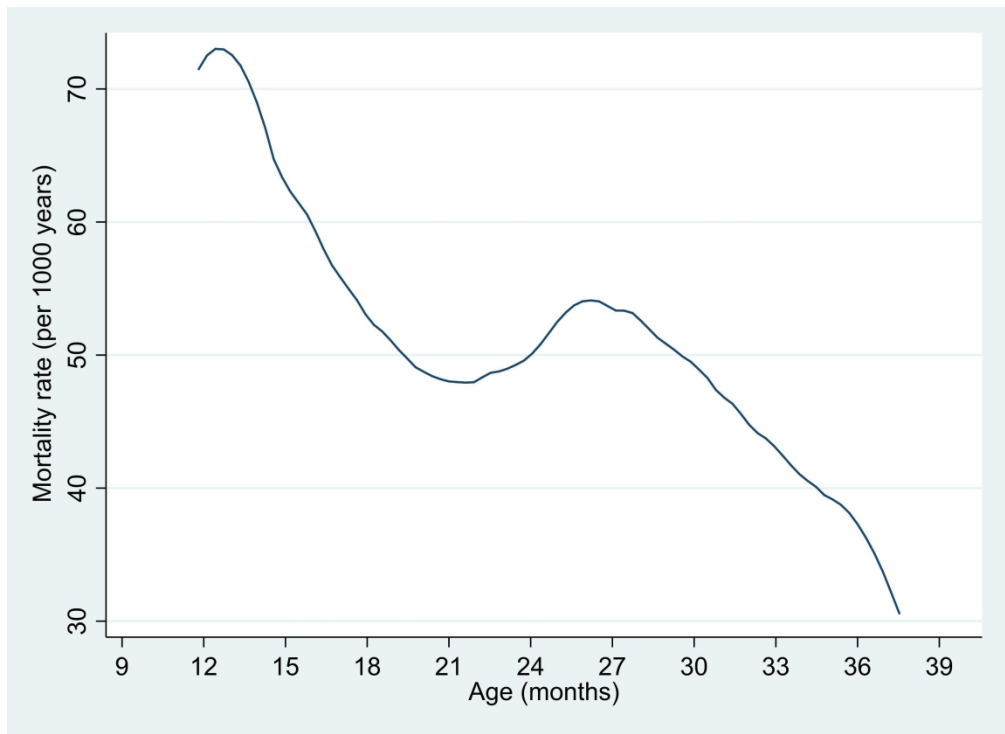

Overall mortality rate among children visited between 9 and 35 months of age.

279x203mm (300 x 300 DPI)

1  
2  
3  
4  
5  
6  
7  
8  
9  
10  
11  
12  
13  
14  
15  
16  
17  
18  
19  
20  
21  
22  
23  
24  
25  
26  
27  
28  
29  
30  
31  
32  
33  
34  
35  
36  
37  
38  
39  
40  
41  
42  
43  
44  
45  
46  
47  
48  
49  
50  
51  
52  
53  
54  
55  
56  
57  
58  
59  
60

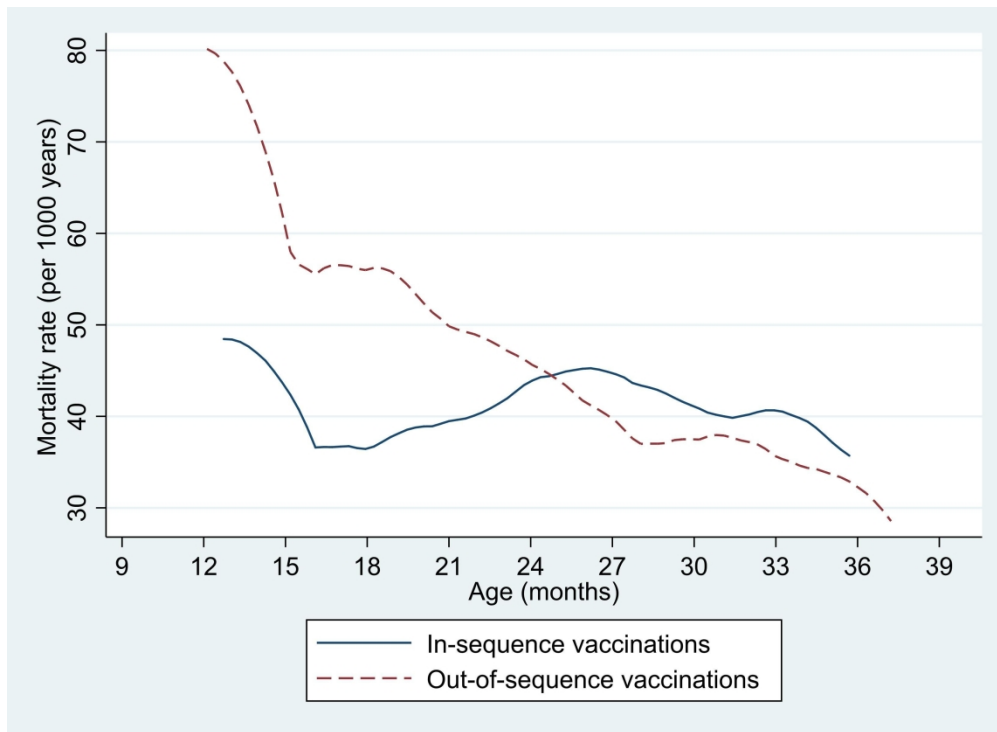

Mortality rate according to sequence of DTP and MV vaccinations among children visited between 9 and 35 months of age.

279x203mm (300 x 300 DPI)

**Supplementary table 1 - Baseline characteristics among children included and excluded from the analyses**

|                                                               | Included         | Excluded         | p-value |
|---------------------------------------------------------------|------------------|------------------|---------|
| Numbers (%)                                                   | 5937 (57)        | 4519 (43)        |         |
| <b>Sex</b>                                                    |                  |                  | .11     |
| Male (%)                                                      | 3039 (51)        | 2242 (50)        |         |
| Female (%)                                                    | 2898 (49)        | 2277 (50)        |         |
| <b>Median age at start of follow-up (interquartile range)</b> | 398 (334 - 471)  | 407 (338 - 477)  | 0.0005  |
| <b>MUAC at start of Follow-up<sup>1</sup></b>                 | -1.06 (1.1)      | -1.09 (1.12)     | .42     |
| <b>Region</b>                                                 |                  |                  | <0.0001 |
| Oio                                                           | 1307 (22)        | 969 (21)         |         |
| Biombo                                                        | 1329 (22)        | 1380 (31)        |         |
| Gabu                                                          | 1350 (23)        | 803 (18)         |         |
| Cacheu                                                        | 787 (13)         | 692 (15)         |         |
| Bafata                                                        | 1164 (20)        | 675 (15)         |         |
| <b>Ethnicity<sup>2</sup></b>                                  |                  |                  | <0.0001 |
| Balanta                                                       | 937 (16)         | 926 (21)         |         |
| Pepel                                                         | 1117 (19)        | 1172 (26)        |         |
| Fula/Mandinca                                                 | 3053 (52)        | 1728 (39)        |         |
| Manjaco                                                       | 265 (5)          | 270 (6)          |         |
| Other                                                         | 501 (9)          | 369 (8)          |         |
| <b>Median maternal age (interquartile range)<sup>3</sup></b>  | 26 (20.9 - 30.8) | 25.3 (20.4 - 30) | <0.0001 |
| <b>Education of caretaker<sup>4</sup></b>                     |                  |                  | 0.95    |
| 0 years                                                       | 5065 (85)        | 3805 (84)        |         |
| 1-4 years                                                     | 616 (10)         | 472 (10)         |         |
| >4 years                                                      | 146 (2)          | 111 (2)          |         |

<sup>1</sup> 3731 observations with missing MUAC

<sup>2</sup> 118 observations with missing information on ethnicity

<sup>3</sup> 116 observations with missing information on maternal age

<sup>4</sup> 241 observations with missing information on education of caretaker

Supplementary table 2 - Mortality of children visited between 18 and 35 months of age according to vaccination group

| Vaccination status                          | Observations<br>N | MR per 1000<br>PYRS<br>(deaths/PYRS) | MRR<br>(95% CI)         | Boys              |                                      |                  | Girls             |                                      |                         |
|---------------------------------------------|-------------------|--------------------------------------|-------------------------|-------------------|--------------------------------------|------------------|-------------------|--------------------------------------|-------------------------|
|                                             |                   |                                      |                         | Observations<br>N | MR per 1000<br>PYRS<br>(deaths/PYRS) | MRR<br>(95% CI)  | Observations<br>N | MR per 1000<br>PYRS<br>(deaths/PYRS) | MRR<br>(95% CI)         |
| DTP < MV                                    | 2415              | 39.9 (46/1154)                       | Ref                     | 1249              | 45.2 (27/598)                        | Ref              | 1166              | 34.1 (19/557)                        | Ref                     |
| DTP = MV                                    | 2065              | 47.0 (46/978)                        | 0.98 (0.62-1.54)        | 1031              | 57.5 (28/487)                        | 1.06 (0.59-1.92) | 1034              | 36.7 (18/491)                        | 0.85 (0.42-1.71)        |
| DTP > MV                                    | 1940              | 31.3 (29/927)                        | 0.62 (0.36-1.06)        | 954               | 41.4 (19/458)                        | 0.83 (0.42-1.63) | 986               | 21.3 (10/469)                        | <b>0.39 (0.16-0.94)</b> |
| DTP, no MV                                  | 580               | 65.9 (18/273)                        | 1.40 (0.77-2.55)        | 278               | 76.2 (10/131)                        | 1.39 (0.63-3.05) | 302               | 56.3 (8/142)                         | 1.37 (0.55-3.42)        |
| No DTP, no MV                               | 502               | 112.0 (26/232)                       | <b>2.18 (1.21-3.90)</b> | 238               | 71.0 (8/113)                         | 1.58 (0.64-3.91) | 264               | 150.8 (18/119)                       | <b>2.68 (1.21-5.94)</b> |
| Out-of-sequence<br>vaccinations<br>combined |                   |                                      |                         |                   |                                      |                  |                   |                                      |                         |
| DTP>=MV                                     | 4005              | 39.4 (75/1,905)                      | 0.82 (0.54-1.24)        | 1985              | 49.7 (47/946)                        | 0.96 (0.56-1.67) | 2020              | 29.2 (28/960)                        | 0.64 (0.33-1.24)        |

Note: Mortality rate ratios were calculated using Cox proportional hazards models with age as underlying time, stratified by sex and village cluster.

**Supplementary table 3 - Registered vaccinations during follow-up (FU) period among those with vaccination status assessed again**

|                                                   | Observations<br>N | Seen card<br>after visit | Vaccinated during FU |           |           |          |
|---------------------------------------------------|-------------------|--------------------------|----------------------|-----------|-----------|----------|
|                                                   |                   |                          | DTP                  | MV        | Polio     | BCG      |
| <b>9-17 months of age<br/>Vaccination status</b>  |                   |                          |                      |           |           |          |
| DTP < MV                                          | 1590              | 1427                     | 31 (2%)              | 0 (0%)    | 51 (4%)   | 3 (0%)   |
| DTP = MV                                          | 1491              | 1324                     | 310 (23%)            | 0 (0%)    | 316 (24%) | 5 (0%)   |
| DTP > MV                                          | 493               | 433                      | 67 (15%)             | 0 (0%)    | 73 (17%)  | 0 (0%)   |
| DTP, no MV                                        | 1816              | 1561                     | 569 (36%)            | 866 (55%) | 576 (37%) | 14 (1%)  |
| No DTP, no MV                                     | 547               | 516                      | 120 (23%)            | 102 (20%) | 118 (23%) | 78 (15%) |
| <b>18-35 months of age<br/>Vaccination status</b> |                   |                          |                      |           |           |          |
| DTP < MV                                          | 2415              | 2053                     | 18 (1%)              | 1 (0%)    | 38 (2%)   | 0 (0%)   |
| DTP = MV                                          | 2065              | 1726                     | 150 (9%)             | 0 (0%)    | 156 (9%)  | 2 (0%)   |
| DTP > MV                                          | 1940              | 1648                     | 75 (5%)              | 0 (0%)    | 82 (5%)   | 1 (0%)   |
| DTP, no MV                                        | 580               | 429                      | 77 (18%)             | 104 (24%) | 79 (18%)  | 0 (0%)   |
| No DTP, no MV                                     | 502               | 462                      | 24 (5%)              | 19 (4%)   | 23 (5%)   | 13 (3%)  |

**Supplementary table 4 - Mortality of children, who had received 3 doses of DTP, visited between 9 and 17 months of age according to vaccination group**

| Vaccination status                          | Observations<br>N | MR per 1000<br>PYRS<br>(deaths/PYRS) | MRR<br>(95% CI)         | Boys              |                                      |                  | Girls             |                                      |                          |
|---------------------------------------------|-------------------|--------------------------------------|-------------------------|-------------------|--------------------------------------|------------------|-------------------|--------------------------------------|--------------------------|
|                                             |                   |                                      |                         | Observations<br>N | MR per 1000<br>PYRS<br>(deaths/PYRS) | MRR<br>(95% CI)  | Observations<br>N | MR per 1000<br>PYRS<br>(deaths/PYRS) | MRR<br>(95% CI)          |
| DTP3 < MV                                   | 1492              | 30.4 (14/460)                        | Ref                     | 774               | 37.7 (9/239)                         | Ref              | 718               | 22.6 (5/221)                         | Ref                      |
| DTP3 = MV                                   | 882               | 49.6 (13/262)                        | 2.07 (0.88-4.86)        | 422               | 64.5 (8/124)                         | 1.77 (0.61-5.15) | 460               | 36.3 (5/138)                         | 2.64 (0.65-10.73)        |
| DTP3 > MV                                   | 363               | 35.8 (3/84)                          | 1.27 (0.33-4.81)        | 191               | 23.2 (1/43)                          | 0.76 (0.09-6.43) | 172               | 49.1 (2/41)                          | 2.09 (0.34-12.86)        |
| DTP3, no MV                                 | 634               | 78.4 (20/255)                        | <b>3.01 (1.42-6.34)</b> | 334               | 88.1 (12/136)                        | 2.56 (0.97-6.74) | 300               | 67.4 (8/119)                         | <b>3.80 (1.17-12.33)</b> |
| Out-of-sequence<br>vaccinations<br>combined |                   |                                      |                         |                   |                                      |                  |                   |                                      |                          |
| DTP3>=MV                                    | 1245              | 46.3 (16/346)                        | 1.85 (0.82-4.16)        | 613               | 53.8 (9/167)                         | 1.53 (0.54-4.29) | 632               | 39.2 (7/179)                         | 2.46 (0.67-9.09)         |

Note: Mortality rate ratios were calculated using Cox proportional hazards models with age as underlying time, stratified by sex and village cluster



STROBE Statement—checklist of items that should be included in reports of observational studies

|                              | Item No. | Recommendation                                                                                                                                                                             | Page No. | Relevant text from manuscript |
|------------------------------|----------|--------------------------------------------------------------------------------------------------------------------------------------------------------------------------------------------|----------|-------------------------------|
| <b>Title and abstract</b>    | 1        | (a) Indicate the study’s design with a commonly used term in the title or the abstract                                                                                                     | 1        |                               |
|                              |          | (b) Provide in the abstract an informative and balanced summary of what was done and what was found                                                                                        | 3        |                               |
| <b>Introduction</b>          |          |                                                                                                                                                                                            |          |                               |
| Background/rationale         | 2        | Explain the scientific background and rationale for the investigation being reported                                                                                                       | 4-5      |                               |
| Objectives                   | 3        | State specific objectives, including any prespecified hypotheses                                                                                                                           | 5        |                               |
| <b>Methods</b>               |          |                                                                                                                                                                                            |          |                               |
| Study design                 | 4        | Present key elements of study design early in the paper                                                                                                                                    | 5-6      |                               |
| Setting                      | 5        | Describe the setting, locations, and relevant dates, including periods of recruitment, exposure, follow-up, and data collection                                                            | 5        |                               |
| Participants                 | 6        | (a) <i>Cohort study</i> —Give the eligibility criteria, and the sources and methods of selection of participants. Describe methods of follow-up                                            | 6        |                               |
|                              |          | <i>Case-control study</i> —Give the eligibility criteria, and the sources and methods of case ascertainment and control selection. Give the rationale for the choice of cases and controls |          |                               |
|                              |          | <i>Cross-sectional study</i> —Give the eligibility criteria, and the sources and methods of selection of participants                                                                      |          |                               |
|                              |          | (b) <i>Cohort study</i> —For matched studies, give matching criteria and number of exposed and unexposed                                                                                   |          |                               |
|                              |          | <i>Case-control study</i> —For matched studies, give matching criteria and the number of controls per case                                                                                 |          |                               |
| Variables                    | 7        | Clearly define all outcomes, exposures, predictors, potential confounders, and effect modifiers. Give diagnostic criteria, if applicable                                                   | 6        |                               |
| Data sources/<br>measurement | 8*       | For each variable of interest, give sources of data and details of methods of assessment (measurement). Describe comparability of assessment methods if there is more than one group       | 5        |                               |
| Bias                         | 9        | Describe any efforts to address potential sources of bias                                                                                                                                  | 7        |                               |
| Study size                   | 10       | Explain how the study size was arrived at                                                                                                                                                  | 8        |                               |

Continued on next page

|                        |     |                                                                                                                                                                                                                                                                                                           |             |
|------------------------|-----|-----------------------------------------------------------------------------------------------------------------------------------------------------------------------------------------------------------------------------------------------------------------------------------------------------------|-------------|
| Quantitative variables | 11  | Explain how quantitative variables were handled in the analyses. If applicable, describe which groupings were chosen and why                                                                                                                                                                              | 6-7         |
| Statistical methods    | 12  | (a) Describe all statistical methods, including those used to control for confounding                                                                                                                                                                                                                     | 6-7         |
|                        |     | (b) Describe any methods used to examine subgroups and interactions                                                                                                                                                                                                                                       | 7           |
|                        |     | (c) Explain how missing data were addressed                                                                                                                                                                                                                                                               |             |
|                        |     | (d) <i>Cohort study</i> —If applicable, explain how loss to follow-up was addressed<br><i>Case-control study</i> —If applicable, explain how matching of cases and controls was addressed<br><i>Cross-sectional study</i> —If applicable, describe analytical methods taking account of sampling strategy |             |
|                        |     | (e) Describe any sensitivity analyses                                                                                                                                                                                                                                                                     | 7           |
| <b>Results</b>         |     |                                                                                                                                                                                                                                                                                                           |             |
| Participants           | 13* | (a) Report numbers of individuals at each stage of study—eg numbers potentially eligible, examined for eligibility, confirmed eligible, included in the study, completing follow-up, and analysed                                                                                                         | 8           |
|                        |     | (b) Give reasons for non-participation at each stage                                                                                                                                                                                                                                                      | Figure 1    |
|                        |     | (c) Consider use of a flow diagram                                                                                                                                                                                                                                                                        | Figure 1    |
| Descriptive data       | 14* | (a) Give characteristics of study participants (eg demographic, clinical, social) and information on exposures and potential confounders                                                                                                                                                                  | 8 + table 1 |
|                        |     | (b) Indicate number of participants with missing data for each variable of interest                                                                                                                                                                                                                       | Table 1     |
|                        |     | (c) <i>Cohort study</i> —Summarise follow-up time (eg, average and total amount)                                                                                                                                                                                                                          | Table 2     |
| Outcome data           | 15* | <i>Cohort study</i> —Report numbers of outcome events or summary measures over time                                                                                                                                                                                                                       | Table 2     |
|                        |     | <i>Case-control study</i> —Report numbers in each exposure category, or summary measures of exposure                                                                                                                                                                                                      |             |
|                        |     | <i>Cross-sectional study</i> —Report numbers of outcome events or summary measures                                                                                                                                                                                                                        |             |
| Main results           | 16  | (a) Give unadjusted estimates and, if applicable, confounder-adjusted estimates and their precision (eg, 95% confidence interval). Make clear which confounders were adjusted for and why they were included                                                                                              | 8 + Table 2 |
|                        |     | (b) Report category boundaries when continuous variables were categorized                                                                                                                                                                                                                                 | Table 1     |
|                        |     | (c) If relevant, consider translating estimates of relative risk into absolute risk for a meaningful time period                                                                                                                                                                                          |             |

Continued on next page

1  
2  
3  
4  
5  
6  
7  
8  
9  
10  
11  
12  
13  
14  
15  
16  
17  
18  
19  
20  
21  
22  
23  
24  
25  
26  
27  
28  
29  
30  
31  
32  
33  
34  
35  
36  
37  
38  
39  
40  
41  
42  
43  
44  
45  
46  
47

|                          |    |                                                                                                                                                                            |                                 |
|--------------------------|----|----------------------------------------------------------------------------------------------------------------------------------------------------------------------------|---------------------------------|
| Other analyses           | 17 | Report other analyses done—eg analyses of subgroups and interactions, and sensitivity analyses                                                                             | 9 + Table 3<br>+ Supp<br>tables |
| <b>Discussion</b>        |    |                                                                                                                                                                            |                                 |
| Key results              | 18 | Summarise key results with reference to study objectives                                                                                                                   | 9                               |
| Limitations              | 19 | Discuss limitations of the study, taking into account sources of potential bias or imprecision. Discuss both direction and magnitude of any potential bias                 | 10                              |
| Interpretation           | 20 | Give a cautious overall interpretation of results considering objectives, limitations, multiplicity of analyses, results from similar studies, and other relevant evidence | 11-12                           |
| Generalisability         | 21 | Discuss the generalisability (external validity) of the study results                                                                                                      | 10-12                           |
| <b>Other information</b> |    |                                                                                                                                                                            |                                 |
| Funding                  | 22 | Give the source of funding and the role of the funders for the present study and, if applicable, for the original study on which the present article is based              | 13                              |

\*Give information separately for cases and controls in case-control studies and, if applicable, for exposed and unexposed groups in cohort and cross-sectional studies.

**Note:** An Explanation and Elaboration article discusses each checklist item and gives methodological background and published examples of transparent reporting. The STROBE checklist is best used in conjunction with this article (freely available on the Web sites of PLoS Medicine at <http://www.plosmedicine.org/>, Annals of Internal Medicine at <http://www.annals.org/>, and Epidemiology at <http://www.epidem.com/>). Information on the STROBE Initiative is available at [www.strobe-statement.org](http://www.strobe-statement.org).

# BMJ Open

## Out-of-sequence DTP and measles vaccinations and child mortality in Guinea-Bissau – a reanalysis

|                                 |                                                                                                                                                                                   |
|---------------------------------|-----------------------------------------------------------------------------------------------------------------------------------------------------------------------------------|
| Journal:                        | <i>BMJ Open</i>                                                                                                                                                                   |
| Manuscript ID                   | bmjopen-2018-024893.R1                                                                                                                                                            |
| Article Type:                   | Research                                                                                                                                                                          |
| Date Submitted by the Author:   | 13-Mar-2019                                                                                                                                                                       |
| Complete List of Authors:       | Thysen, Sanne; Bandim Health Project, Statens Serum Institut , Rodrigues, Amabelia; Bandim Health Project Aaby, Peter; Bandim Health Project, Fisker, Ane; Bandim Health Project, |
| <b>Primary Subject Heading</b>: | Global health                                                                                                                                                                     |
| Secondary Subject Heading:      | Epidemiology, Health policy, Infectious diseases, Paediatrics, Public health                                                                                                      |
| Keywords:                       | DTP vaccine, Measles vaccine, Child mortality, Vaccine sequence, Non-specific (heterologous) effects of vaccines                                                                  |
|                                 |                                                                                                                                                                                   |

SCHOLARONE™  
Manuscripts

1  
2  
3  
4 **Out-of-sequence DTP and measles vaccinations and child mortality in Guinea-Bissau – a reanalysis**  
5  
6  
7  
8

9 *Sanne Marie Thysen<sup>a,b,c</sup>, Amabelia Rodrigues<sup>a</sup>, Peter Aaby<sup>a,b</sup>, Ane Bærent Fisker<sup>a,b,d</sup>*  
10  
11  
12  
13

14 <sup>a</sup> Bandim Health Project, INDEPTH Network, Bissau, Guinea-Bissau

15 <sup>b</sup> Research Centre for Vitamins and Vaccines, Bandim Health Project, Statens Serum Institut,  
16 Copenhagen, Denmark  
17

18 <sup>c</sup> Center for Global Health (GloHAU), Aarhus University, Aarhus, Denmark  
19

20 <sup>d</sup> OPEN, Institute of Clinical Research, University of Southern Denmark, Odense, Denmark  
21  
22  
23  
24

25 Authors:

26  
27 Sanne Marie Thysen, [s.thysen@bandim.org](mailto:s.thysen@bandim.org)  
28

29 Amabelia Rodrigues, [a.rodriques@bandim.org](mailto:a.rodriques@bandim.org)  
30

31 Peter Aaby, [p.aaby@bandim.org](mailto:p.aaby@bandim.org)  
32  
33

34 Ane Bærent Fisker, [a.fisker@bandim.org](mailto:a.fisker@bandim.org)  
35  
36  
37  
38  
39  
40  
41

42 **Corresponding author:** Sanne Marie Thysen, Bandim Health Project, INDEPTH Network, Apartado  
43 861, 1004 Bissau Codex, Guinea-Bissau; [s.thysen@bandim.org](mailto:s.thysen@bandim.org)  
44  
45  
46  
47

48 **Keywords:** DTP vaccine, measles vaccine, child mortality, vaccine sequence, non-specific (heterologous)  
49 effects of vaccines  
50

51  
52 **Word count:** Abstract: 300, Manuscript: 3720  
53  
54  
55  
56  
57  
58  
59  
60

## Abstract

**Objectives** To assess whether the sequence of diphtheria-tetanus-pertussis vaccine (DTP) and measles vaccine (MV) was associated with child survival in a dataset previously used to assess non-specific effects of vaccines with no consideration of vaccination sequence.

**Design** Prospective cohort study analysed using the landmark approach.

**Setting** Bandim Health Project's Health and Demographic Surveillance System covering 100 village clusters in rural Guinea-Bissau. The recommended vaccination schedule was BCG and oral polio vaccine (OPV) at birth, DTP and OPV at 6, 10 and 14 weeks, MV at 9 months, and booster-DTP and OPV at 18 months of age.

**Participants** Children aged 9-17 months (main analysis) and 18-35 months (secondary analysis: age of booster DTP) with vaccination status assessed between April 1991 and April 1996.

**Methods** Survival during the six months after assessing vaccination status was compared by vaccination sequence in Cox-proportional hazards models with age as underlying time. Analyses were stratified by sex and village cluster.

**Main outcome measure** Mortality rate ratio (MRR) for out-of-sequence vaccinations compared with in-sequence vaccinations.

**Results** Among children aged 9-17 months, 60% of observations (3574/5937) were from children who had received both MV and DTP. Among these, 1590 observations were classified as in-sequence vaccinations (last DTP before MV), and 1984 observations were out-of-sequence vaccinations (1491: MV with DTP and 493: MV before DTP). Out-of-sequence vaccinations were associated with higher mortality than in-sequence vaccinations (MRR 2.10 (95% CI: 1.07-4.11)); the MRR was 2.30 (1.15-4.58) for MV with DTP and 1.45 (0.50-4.22) for DTP after MV). Associations were similar for boys and girls ( $p=0.77$ ). Between 18-36 months the mortality rate increased among children vaccinated in-sequence and the differential effect of out-of-sequence vaccinations disappeared.

**Conclusion** Out-of-sequence vaccinations may increase child mortality. Hence, sequence of vaccinations should be considered when planning vaccination programmes or introducing new vaccines into the current vaccination schedule.

#### Strengths and limitations of this study

- Vaccination status of the children were only updated at the inspection of a vaccination card. Hence, this study used the landmark analyses and thus prevented survival bias
- Misclassification of vaccinations due to the landmark approach would yield conservative estimates
- Booster doses of DTP were not registered before 1996, and we were therefore not able to make any firm conclusions of the effect of booster DTP
- Sensitivity analyses were conducted to limit the effect of vaccinations during follow-up

For peer review only

## Introduction

Child mortality has declined significantly between 2000 and 2015.<sup>1</sup> Part of this decline is due to a reduction in preventable childhood diseases much of which is commonly ascribed to vaccines.<sup>2</sup> Vaccines are designed to protect against specific pathogens.<sup>3</sup> However, vaccines may have broader effects aside from the disease-specific protection with the live vaccines stimulating the immune system and reducing mortality by more than can be explained by preventing the target infection.<sup>4-7</sup> Hence, due to beneficial non-specific effects (NSEs) of live vaccines, vaccines may have played an even larger role in the decline of childhood mortality than usually assumed.

Studies from the introduction of the measles vaccine (MV) in the 1970's and 1980's from Asia and Africa showed larger reductions in mortality than could be ascribed to the prevention of measles infection.<sup>8-10</sup> Both observational studies and randomised trials have later confirmed lower mortality among measles-vaccinated children compared with measles-unvaccinated children.<sup>11-13</sup> Based on accumulating evidence, WHO's Strategic Advisory Group of Experts on immunization (SAGE) recently reviewed the evidence for NSEs of some vaccines, and concluded that the evidence for MV was consistent with beneficial NSEs, especially for girls.<sup>7 14</sup>

The introduction of diphtheria-tetanus-pertussis vaccine (DTP) in the 1980's was associated with higher overall mortality, despite the protection against the specific diseases.<sup>15-17</sup> Other studies comparing mortality of DTP-vaccinated children and DTP-unvaccinated children have later confirmed the negative NSEs, especially for girls.<sup>11 18-21</sup> The WHO review of NSEs stated that beneficial or deleterious NSEs of DTP could not be confirmed nor refuted based on the evidence available.<sup>7 14</sup> However, the WHO review included studies with major survival bias; if the meta-analysis is restricted to studies with documentation of vaccination status and prospective follow-up, DTP-vaccinated children had two-fold higher mortality than DTP-unvaccinated children.<sup>22</sup>

Both observational studies<sup>18 20 23-27</sup> and randomised trials<sup>19 28</sup> suggest that the NSEs depends most strongly on the most recent vaccination and that sequence of vaccinations therefore is important. Randomised trials have compared inactivated vaccine after medium- or high-titre MV with standard-titre MV after inactivated vaccine. A meta-analysis of the trials indicates that receiving an inactivated vaccine after a live MV was associated with a mortality rate-ratio (MRR) of 1.38 (95% CI: 1.05-1.83) compared with receiving live MV after an inactivated vaccine, the negative effect being particularly strong for females.<sup>28</sup>



1  
2  
3  
4 In the first study that assessed the effect on mortality of MV and DTP, having received MV vs no MV  
5 was associated with a MRR of 0.48 (0.27-0.87); in contrast having received DTP vs no DTP was  
6 associated with higher mortality (MRR=1.84 (1.10-3.10)).<sup>11</sup> The analysis did not consider sequence of  
7 vaccinations, the potential importance of which had not yet been detected. We took advantage of this  
8 historical dataset<sup>11</sup> to test if the different sequences of DTP and MV vaccinations were associated with  
9 mortality. The issue is particularly important now because WHO is planning to add several non-live  
10 vaccines to the vaccination schedule,<sup>29</sup> including booster DTP and RTS,S malaria vaccine, and some will  
11 be given after MV.  
12  
13  
14  
15  
16  
17

## 18 **Methods**

### 19 *Setting*

20  
21  
22  
23 Data was collected within the Bandim Health Project's Health and Demographic Surveillance System  
24 (HDSS) in rural Guinea-Bissau. The HDSS was established in 1990 using the Expanded Programme on  
25 Immunizations (EPI) methodology, randomly selecting 20 clusters of 100 women in each of the five  
26 largest health regions. Women of fertile age and their children below 5 years of age were followed  
27 through biannual visits. Women were registered at 14-16 years of age or when they moved into the  
28 village and were followed to death or migration. Newly registered women were interviewed about their  
29 past obstetric history, age, ethnicity and whether they had attended school. Children were registered  
30 during pregnancy or when they moved into the village. Children were followed until death, migration or 5  
31 years of age.  
32  
33  
34  
35  
36  
37  
38

39  
40 At all visits, vaccination status, nutritional status and vital status were assessed. Vaccination status was  
41 assessed by inspection of a vaccination card. Children with no vaccination card and whose mother stated  
42 that the child had never received any vaccine were considered "unvaccinated". Only children with  
43 ascertained vaccination status (seen vaccination card, confirmed unvaccinated) were included in the  
44 analyses. Nutritional status was assessed by measurement of the child's mid-upper-arm circumference  
45 (MUAC).  
46  
47  
48  
49

### 50 *Vaccination programme and definition of exposure*

51  
52  
53 The vaccination schedule consisted of Bacillus Calmette-Guérin vaccine (BCG) and oral polio vaccine  
54 (OPV) at birth, 3 doses of DTP and OPV at 6, 10 and 14 weeks of age, MV at 9 months of age and  
55 booster doses of DTP and OPV at 18 months of age. The vaccination schedule did not change during the  
56 study period. Vaccinations were provided through the national immunization programme. Systematic  
57  
58  
59  
60

1  
2  
3  
4 registration of DTP and OPV booster doses were only initiated in 1996, and thus, booster doses were not  
5 registered during the study period.  
6  
7

8 Children were divided into 5 groups according to the most recent vaccination(s) at the time their  
9 vaccination card was inspected: One group consisted of children, who were vaccinated in the  
10 recommended sequence, having received MV after DTP (DTP<MV). Two groups were vaccinated out-  
11 of-sequence: Children who had received DTP and MV simultaneously (DTP=MV), and children who had  
12 received DTP after MV (DTP>MV). Two groups had not received MV; children who had received DTP,  
13 but had not received MV (DTP, no MV) and children who had not received MV nor DTP (no DTP, no  
14 MV).  
15  
16  
17  
18  
19

### 20 21 *Study population*

22  
23 Children aged 9 to 35 months when visited between April 9, 1991 and April 24, 1996 were eligible for the  
24 study. Figure 1 depicts the combined mortality rate of all study children. Mortality declines with age as  
25 expected in the beginning, but in the months following 18 months of age the mortality rate increases. The  
26 primary analysis is the age group 9-17 months since this is the period after MV is scheduled and before  
27 the scheduled age of booster dose of DTP. Children aged 18 to 35 months at the time of visit were  
28 included in a secondary analysis since they could have received a booster dose of DTP after their in-  
29 sequence or out-of-sequence vaccinations.  
30  
31  
32  
33  
34  
35

### 36 *Statistical analyses*

37  
38 Baseline characteristics for different vaccination groups were compared using chi<sup>2</sup>-test, Kruskal-Wallis  
39 rank test and one-way ANOVA comparison. We also compared baseline characteristics of children  
40 included in the analyses with children registered in the HDSS, but not included in the analyses using chi<sup>2</sup>-  
41 test, t-test and Wilcoxon ranksum test. MUAC of children was expressed as a z-score compared with the  
42 2006-WHO growth reference,<sup>30</sup> thus obtaining a standardized measure.  
43  
44  
45  
46  
47

48 Using a Cox-proportional hazards model with age as underlying timescale, we compared mortality rates  
49 of children vaccinated out-of-sequence and children missing MV with the mortality rates of children  
50 vaccinated in-sequence. Children entered the analysis at the date of inspection of the vaccination card and  
51 remained in the analysis in the same vaccination group until the subsequent village visit, 6 months after  
52 the visit, death or migration, whichever came first. A child could therefore contribute with two non-  
53 overlapping periods if the vaccination status was assessed at more than one visit within the relevant age  
54 range (9 to 17 months). The booster doses of DTP and OPV administered at 18 months of age was not  
55  
56  
57  
58  
59  
60

1  
2  
3  
4 registered consistently and we were therefore not able to account for which children had received the  
5 booster doses; we therefore censored at 18 months of age in the main analysis.  
6  
7

8 The data was analysed using the landmark approach,<sup>31</sup> in which the child's vaccination status is only  
9 updated when the vaccination status is re-assessed at the next home visit. If we had used the actual  
10 vaccination dates obtained at subsequent home visits to change the vaccine status, we would have better  
11 vaccination information for children who survived and had kept their vaccination cards, whereas the  
12 families of children who died between visits were likely to have discarded the vaccination card. As a  
13 consequence, the survivors would be given risk-free survival time for their new vaccination status,  
14 whereas it would not be known if the dead child had been vaccinated, and the child would therefore be  
15 misclassified as less vaccinated or unvaccinated. Such "risk-free" survival time will strongly inflate the  
16 estimated benefit of the last vaccination. To avoid such survival bias, we have therefore chosen the  
17 landmark approach.<sup>31</sup>  
18  
19  
20  
21  
22  
23  
24  
25

26 In a secondary analysis, we assessed the effects of out-of-sequence vaccinations among children who  
27 were eligible for the DTP booster dose. In this analysis, we included children aged 18 to 35 months at the  
28 time of visit.  
29  
30

31  
32 Since previous studies have reported sex-differential NSEs, all analyses were stratified by sex and  
33 separate estimates by sex are presented. All analyses were stratified by village cluster, thus comparing  
34 only children from the same community. All available baseline characteristics (Table 1) were included in  
35 the analyses one by one. No variable changed the main estimate by more than 10% and adjusted estimates  
36 are therefore not presented.  
37  
38  
39  
40

41 The original study assessed the effect of MV compared with no MV. To account for sequence of  
42 vaccination, we reanalysed the NSEs of MV comparing children vaccinated in-sequence with MV after  
43 DTP with children with no MV (DTP, no MV and no DTP, no MV).  
44  
45  
46

#### 47 *Sensitivity analyses*

48

49 Since many children were vaccinated during follow up, i.e. after the inspection of their vaccination card,  
50 which allowed their exposure group to be classified, we conducted two sensitivity analyses to limit the  
51 effect of vaccines administered during follow-up. In the first sensitivity analysis, we censored observation  
52 time at 2 months after entry. In the second sensitivity analysis, we included only children who had  
53 completed three DTP vaccinations and were therefore not eligible for further doses during follow-up.  
54  
55  
56  
57  
58

#### 59 *Ethical considerations*

60

1  
2  
3  
4 The data was derived from the HDSS routine data collection, which has been ongoing since 1990 in  
5 collaboration with the Ministry of Health in Guinea-Bissau.<sup>11</sup>  
6  
7

### 8 *Patient and public involvement*

9

10 The communities were involved in locating households, when the HDSS was setup and contributed  
11 information allowing tracing of internal migrants between villages throughout the study period. No  
12 participants were involved in setting the research question or the outcome measure, nor were they  
13 involved in developing plans for recruitment, design, or implementation of the study. No participant was  
14 asked to advise on interpretation or writing up the results. The results are disseminated to the national  
15 public health institute. There are no plans to disseminate the results of the research to study participants or  
16 the community.  
17  
18  
19  
20  
21  
22

## 23 **Results**

### 24 *Baseline characteristics*

25

26 Vaccination status was assessed for 4862 children aged 9-17 months contributing with 5956 observations  
27 (Figure 2). In addition to the 2536 children not included as their vaccination status was not assessed, we  
28 excluded 18 children corresponding to 19 observations from the analyses. These were children with  
29 unknown date of MV or DTP (8 children, 9 observations), and children who had received MV, but no  
30 DTP (10 children, 10 observations). We compared the distribution of baseline characteristics between  
31 children included in and excluded from the study (Supplementary table 1). Children excluded differed  
32 from the children included in the analyses with respect to age, region of residence, ethnicity and maternal  
33 age, but sex, nutritional status and maternal education did not differ. We also compared the distribution of  
34 baseline characteristics for different vaccination groups (Table 1). The age of children differed by  
35 vaccination group: children with DTP>MV were older than children who received DTP before or together  
36 with MV and children without MV were younger ( $p<0.0001$ ). Mean MUAC z-scores for all groups were  
37 around one standard deviation below the reference, but children with DTP>MV and no DTP, no MV  
38 tended to deviate more from the WHO reference curve for MUAC compared with the other groups. The  
39 distribution of vaccination groups differed by region and ethnicity. More mothers of children vaccinated  
40 out-of-sequence or with missing MV had never attended school than mothers of children vaccinated in-  
41 sequence. Children vaccinated out-of-sequence had received their most recent vaccine closer to entry in  
42 the analysis (Table 1).  
43  
44  
45  
46  
47  
48  
49  
50  
51  
52  
53  
54  
55  
56

### 57 *Mortality by vaccination group among children aged 9-17 months*

58  
59  
60

1  
2  
3  
4 Children vaccinated out-of-sequence had higher mortality compared with children vaccinated in-sequence  
5 (MRR: 2.10 (95% CI: 1.07-4.11); DTP=MV: 2.30 (1.15-4.58) and DTP>MV: 1.45 (0.50-4.22)). Children  
6 who had received DTP, but no MV had higher mortality compared with children vaccinated in-sequence  
7 (MRR: 2.57 (1.37-4.83)). Children without DTP and MV had higher mortality than children vaccinated  
8 in-sequence (MRR: 3.04 (1.41-6.55)) (Table 2). The associations were similar for boys and girls ( $p=0.77$ ).  
9 For boys, out-of-sequence vaccinations were associated with a MRR of 1.96 (0.80-4.78); for girls, the  
10 MRR was 2.25 (0.81-6.30). DTP without MV was associated significantly with higher mortality for boys  
11 (MRR: 3.41 (1.50-7.77)); mortality for girls was also higher, but not statistically significant (MRR: 1.67  
12 (0.62-4.50)) (Table 2).

13 We have previously estimated a MRR of 0.48 (0.27-0.87) for MV versus no MV, without taking sequence  
14 of vaccination into consideration<sup>11</sup>. When we examined the NSEs of measles vaccine by comparing  
15 children MV-vaccinated in-sequence with children not MV-vaccinated, we found a MRR of 0.40 (0.23-  
16 0.69) (data not shown).

#### 17 *Mortality by vaccination group among children aged 18 to 35 months*

18 Initially, mortality declined with age as expected (Figure 1). However, in spite of being older, in-sequence  
19 vaccinated children had higher mortality at 18 to 35 months of age (mortality rate (MR): 39.9 per 1000  
20 person years (PYRS)) than children aged 9 to 17 months (MR: 32.6 per 1000 PYRS). Mortality  
21 developed differently with age for children vaccinated in-sequence compared with children vaccinated  
22 out-of-sequence (Figure 3). Since the in-sequence group had high mortality, there was no real differences  
23 in mortality between out-of-sequence and in-sequence vaccinations in the 18-35 months age group  
24 (Supplementary table 2). The MRR for out-of-sequence compared with in-sequence vaccinated children  
25 differed significantly between the age group 9-17 months (Table 2) and 18-35 months (Supplementary  
26 table 2) (test of interactions,  $p=0.02$ ).

#### 27 *Sensitivity analyses*

28 In the age group 9-17 months at least 20% of children vaccinated out-of-sequence received further doses  
29 of DTP during follow-up, but few children vaccinated in-sequence did (Supplementary table 3). To  
30 minimise the effect of vaccinations during follow-up, we conducted two sensitivity analyses. First, we  
31 censored follow-up 2 months after entry since few additional vaccines would be provided in that time  
32 window. This clearly restricted the power, but the trends remained the same: Out-of-sequence  
33 vaccinations were associated with a MRR of 2.51 (0.86-7.35) (Table 3). The estimates changed more for  
34  
35  
36  
37  
38  
39  
40  
41  
42  
43  
44  
45  
46  
47  
48  
49  
50  
51  
52  
53  
54  
55  
56  
57  
58  
59  
60

1  
2  
3  
4 girls; out-of-sequence vaccinations being associated with an 8-fold higher mortality for girls (MRR: 7.83  
5 (0.90-67.83)). Second, we restricted the dataset to children who had received DTP3 and therefore were  
6 unlikely to receive additional routine DTP vaccinations during follow-up (Supplementary table 4). The  
7 MRR of out-of-sequence vaccinations compared with in-sequence vaccinations was 1.85 (0.82-4.16), and  
8 the effect was similar for boys and girls ( $p=0.60$ ) (Supplementary table 4). For girls, both DTP3=MV and  
9 DTP3>MV were associated with higher mortality. For boys, DTP3=MV were associated with higher  
10 mortality, whereas DTP3>MV was not (Supplementary table 4).  
11  
12  
13  
14  
15

## 16 **Discussion**

### 17 *Main findings*

18  
19  
20  
21  
22 Out-of-sequence vaccinations were associated with higher mortality compared with in-sequence  
23 vaccinations. After 18 months, the recommended age of booster DTP vaccination, the general mortality  
24 rate increased and the differential effect of out-of-sequence vaccinations disappeared.  
25  
26

### 27 *Strengths and weaknesses*

28  
29  
30 Using the landmark approach, survival bias was prevented since the vaccination status of the children was  
31 only updated when vaccination status was re-assessed, thereby preventing that vaccination information  
32 was updated for surviving children, but not for dead children. While this approach does not misclassify  
33 observation time dependent on the outcome, the misclassification of vaccinations during follow-up would  
34 yield conservative estimates.<sup>31</sup>  
35  
36  
37

38  
39 Data was collected through the rural HDSS in Guinea-Bissau and vaccination status was based on the  
40 vaccination card being inspected. Vaccinated children, whose vaccination card was not presented, were  
41 not included in the analysis. Mortality as the main outcome is unlikely to be reported wrongly, and with  
42 visits every 6 months, the imprecision in date of death is limited. Booster doses of DTP were not  
43 registered before 1996 and we could not fully explore the effect of booster DTP in the present cohort. To  
44 limit the effect of vaccinations during follow-up, we censored the main analysis at 18 months of age,  
45 when the children were eligible for the DTP booster; furthermore, we conducted two sensitivity analyses  
46 in which we first restricted follow-up to 2 months after entry and second limited the analysis to children  
47 who had received three doses of DTP. The conclusions of the main analysis were robust in these  
48 sensitivity analyses. The statistical model used, only compared children within the same village cluster,  
49 thus limiting bias from local differences such as epidemics, ethnicity, and access to health care.  
50  
51  
52  
53  
54  
55  
56  
57  
58 Comparing children across clusters did not change the conclusions (data not shown).  
59  
60

1  
2  
3  
4 In spite of the careful collection of vaccination information and individual level follow-up, we cannot  
5 guarantee that observed mortality differences are caused only by the sequence of vaccinations. To limit  
6 confounding, we assessed whether available background factors changed the estimate by more than 10%.  
7  
8 As no background factor changed the estimate by more than 10%, we did not present adjusted estimates.  
9  
10 However, there may be residual confounding not adjusted for.  
11  
12

13 To enter the analysis, a child had to survive to have the vaccination card inspected, and a differential  
14 mortality pattern before the inspection of the vaccination card would not be captured in our analyses.  
15  
16 However, in prior studies of vaccination sequence and mortality, the effects have been similar regardless  
17 of whether vaccinations are registered at the time of vaccinations<sup>26 32</sup> or later<sup>24 27</sup>, and this is therefore  
18 unlikely to explain the pattern.  
19  
20  
21

### 22 *Comparison with other studies*

23  
24 Similar to our study, previous studies have found that out-of-sequence vaccinations are associated with  
25 increased mortality.<sup>24-26 33-35</sup> In the WHO-commissioned review, out-of-sequence vaccinations with DTP  
26 and MV were associated with a relative mortality risk of 2.34 (1.57-3.50) compared with MV after DTP.<sup>7</sup>  
27  
28 Hence, the age group 9-17 months in the present study is entirely consistent with previous studies. Out-  
29 of-sequence vaccinations may affect not only mortality but also hospital admissions; large population-  
30 based cohort studies from Denmark found that out-of-sequence vaccinations of DTP and MV were  
31 associated with higher hospitalisation rates.<sup>36 37</sup> To our knowledge, no study without survival bias has  
32 found beneficial effects of out-of-sequence vaccinations with DTP and MV.  
33  
34  
35  
36  
37  
38

39 The original study assessed the effect of MV compared with no MV and found a MRR of 0.48 (0.27-  
40 0.87)<sup>11</sup> not accounting for sequence of vaccination. According to our analyses this has underestimated the  
41 NSEs of MV. When we considered sequence of vaccination and compared children MV-vaccinated in-  
42 sequence with children not MV-vaccinated, we found a MRR of 0.40 (0.23-0.69).  
43  
44  
45  
46

47 The mortality rate usually declines with age.<sup>38</sup> In our study, among children vaccinated in-sequence, we  
48 found higher mortality rate in children aged 18 to 35 months compared with children aged 9 to 17 months  
49 (Figure 3). Since mortality did decline with age in the younger age group, we speculate that DTP booster  
50 for which children were eligible at 18 months of age may have contributed to this pattern just like DTP  
51 out-of-sequence with MV was associated with higher mortality. Unfortunately, our data collection tool in  
52 the early 1990 did not systematically assess DTP booster coverage. According to UNICEF figures, the  
53 DTP3 coverage was low in 1991-1996 (45-74%),<sup>39</sup> and we would not expect the coverage of booster DTP  
54  
55  
56  
57  
58  
59  
60

1  
2  
3  
4 to be high. In urban Bissau, where the coverage for booster DTP was high, we have previously shown a  
5 similar increase in mortality after 18 months of age.<sup>5</sup> Thus, DTP booster doses may partly explain the  
6 higher mortality among 18-35 months old children, as observed in Gambia and India.<sup>5 35 40</sup>  
7  
8

9  
10 Effects were similar for boys and girls, and overall we found no sex-differential effect of out-of-sequence  
11 vaccinations. However, other studies have found higher female mortality when DTP was administered  
12 after MV<sup>21 40</sup>; for example, high-titre measles vaccine (HTMV) was associated with higher female  
13 mortality and had to be withdrawn because most HTMV recipients had received DTP after MV.<sup>28</sup> In the  
14 present cohort, few children had received DTP after MV and most out-of-sequence vaccinations were  
15 combined administration of DTP and MV. When follow-up was limited to 2 months, estimates for out-of-  
16 sequence changed more for girls than for boys even though the difference between boys and girls did not  
17 reach statistical significance.  
18  
19  
20  
21  
22  
23

#### 24 *Interpretation and implications*

25  
26  
27 We found that out-of-sequence vaccinations were associated with higher mortality both for children with  
28 co-administration of DTP and MV, and children with DTP after MV, compared with children vaccinated  
29 in-sequence. It could be speculated that out-of-sequence vaccinated children just had higher mortality  
30 because they were frail or their mothers less compliant with health services. In the present study, it speaks  
31 against the effect being due to an inherent bias that the difference disappeared completely for 18-35  
32 months old children, possibly due to booster DTP. Furthermore, evidence from RCTs of medium and  
33 high-titre MV strongly supported that an inactivated vaccine after MV was associated with higher  
34 mortality.<sup>28</sup> Thus, sequence of vaccinations is likely to be important for child survival and should be  
35 considered when planning, implementing and evaluating the childhood vaccination programmes.  
36  
37  
38  
39  
40  
41  
42

43 Current vaccination recommendations are based merely on the disease-specific effects of vaccines, often  
44 based on surrogate measures of the ability to prevent targeted infections. However, if vaccines alter the  
45 susceptibility to other infections this should be considered. Currently, vaccination programmes are  
46 evaluated based on vaccination coverage of DTP and MV at 12 months of age, and timeliness or sequence  
47 of vaccination is not taken into account. We found that DTP not succeeded by MV was associated with  
48 increased mortality and that out-of-sequence vaccinations were associated with higher mortality  
49 compared with children vaccinated in-sequence, thus, the current evaluation criteria emphasising DTP3  
50 coverage may not optimise the impact of the vaccination programme on child health. Our results indicate  
51 that a stronger emphasis should be put on increasing the MV coverage and getting DTPs and MV in the  
52 recommended sequence.  
53  
54  
55  
56  
57  
58  
59  
60



1  
2  
3  
4 Currently WHO is planning to introduce the second year of life platform with several inactivated vaccines  
5 (booster DTP, Meningitis A, RTS,S Malaria vaccine).<sup>29</sup> Hence, in the future children may receive  
6 inactivated vaccines after live MV at 9 months of age, not only because they deviate from the  
7 recommended schedule, but also if they follow the schedule. We urge others to test the effect of providing  
8 non-live vaccines after MV, preferably prior to the introduction of new vaccines, while RCTs are still  
9 possible.  
10  
11  
12

## 13 14 15 **Conclusion**

16  
17 Overall, we found that out-of-sequence vaccinations in children were associated with higher mortality  
18 compared with children vaccinated in-sequence. Vaccination programmes should monitor the sequence of  
19 vaccinations to optimise the overall effect on child survival.  
20  
21  
22

## 23 24 25 **Funding**

26  
27 This work was supported by European Union FP7 support for OPTIMUNISE [Health-F3-2011-261375],  
28 and by DANIDA travel grant [grant no. A27607]. The Bandim Health Project received support from the  
29 Danish National Research Foundation via Research Center for Vitamins and Vaccines [DNRF108]. The  
30 sponsors had no role in designing the study, the data collection, data analysis, data interpretation or  
31 writing the paper.  
32  
33  
34  
35  
36

## 37 38 **Acknowledgments**

39  
40 We wish to thank all children and mothers contributing with information to the present study.  
41 Furthermore, we would like to thank the dedicated staff working at BHP in Guinea-Bissau for the great  
42 job they have done regarding data collection, data entry and data cleaning for the present study.  
43  
44  
45

## 46 47 **Authors' contributions**

48 SMT, PA and ABF designed the study and planned the analyses. SMT extracted, cleaned and analysed  
49 the data. PA supervised the data collection and data entry. SMT drafted the paper with assistance from  
50 PA, AR and ABF. All authors read and approved the final manuscript.  
51  
52  
53

## 54 55 **Copyright**

56 The Corresponding Author has the right to grant on behalf of all authors and does grant on behalf of all  
57 authors, a worldwide license to the Publishers and its licensees in perpetuity, in all forms, formats and  
58  
59  
60

1  
2  
3  
4 media (whether known now or created in the future), to i) publish, reproduce, distribute, display and store  
5 the Contribution, ii) translate the Contribution into other languages, create adaptations, reprints, include  
6 within collections and create summaries, extracts and/or, abstracts of the Contribution, iii) create any  
7 other derivative work(s) based on the Contribution, iv) to exploit all subsidiary rights in the Contribution,  
8 v) the inclusion of electronic links from the Contribution to third party material where-ever it may be  
9 located; and, vi) license any third party to do any or all of the above.  
10  
11  
12  
13  
14

### 15 **Competing interests**

16  
17 All authors have completed the ICMJE uniform disclosure form at [www.icmje.org/coi\\_disclosure.pdf](http://www.icmje.org/coi_disclosure.pdf) and  
18 declare: no support from any organisation for the submitted work; no financial relationships with any  
19 organisations that might have an interest in the submitted work in the previous three years; no other  
20 relationships or activities that could appear to have influenced the submitted work.  
21  
22  
23  
24

### 25 **Data sharing**

26  
27 Data used for analyses in the present study are available from the corresponding author on reasonable  
28 request.  
29  
30

### 31 **Transparency statement**

32  
33 SMT affirms that the manuscript is an honest, accurate, and transparent account of the study being  
34 reported; that no important aspects of the study have been omitted; and that any discrepancies from the  
35 study as originally planned have been explained.  
36  
37  
38  
39  
40  
41  
42  
43  
44  
45  
46  
47  
48  
49  
50  
51  
52  
53  
54  
55  
56  
57  
58  
59  
60

## References

1. Liu L, Oza S, Hogan D, et al. Global, regional, and national causes of under-5 mortality in 2000-15: an updated systematic analysis with implications for the Sustainable Development Goals. *Lancet* 2016;388(10063):3027-35. doi: 10.1016/S0140-6736(16)31593-8
2. Feikin DR, Flannery B, Hamel MJ, et al. Vaccines for children in Low- and Middle-Income Countries. In: Black RE, Laxminarayan R, Temmerman M, et al., eds. Reproductive, Maternal, Newborn, and Child Health: Disease Control Priorities: World Bank 2016.
3. Plotkin S. History of vaccination. *Proceedings of the National Academy of Sciences of the United States of America* 2014;111(34):12283-7. doi: 10.1073/pnas.1400472111 [published Online First: 2014/08/20]
4. Benn CS, Netea MG, Selin LK, et al. A small jab - a big effect: nonspecific immunomodulation by vaccines. *Trends in immunology* 2013;34(9):431-9. doi: 10.1016/j.it.2013.04.004
5. Aaby P, Kollmann TR, Benn CS. Nonspecific effects of neonatal and infant vaccination: public-health, immunological and conceptual challenges. *Nature immunology* 2014;15(10):895-9. doi: 10.1038/ni.2961
6. Aaby P, Benn CS. Non-specific and sex-differential effects of routine vaccines: what evidence is needed to take these effects into consideration in low-income countries? *Human vaccines* 2011;7(1):120-4. [published Online First: 2011/02/01]
7. Higgins JP, Soares-Weiser K, Lopez-Lopez JA, et al. Association of BCG, DTP, and measles containing vaccines with childhood mortality: systematic review. *BMJ* 2016;355:i5170. doi: 10.1136/bmj.i5170
8. Aaby P, Samb B, Simondon F, et al. Non-specific beneficial effect of measles immunisation: analysis of mortality studies from developing countries. *BMJ* 1995;311(7003):481-5. [published Online First: 1995/08/19]
9. Desgrees du Lou A, Pison G, Aaby P. Role of immunizations in the recent decline in childhood mortality and the changes in the female/male mortality ratio in rural Senegal. *Am J Epidemiol* 1995;142(6):643-52.
10. Aaby P, Bhuiya A, Nahar L, et al. The survival benefit of measles immunization may not be explained entirely by the prevention of measles disease: a community study from rural Bangladesh. *Int J Epidemiol* 2003;32(1):106-16.
11. Kristensen I, Aaby P, Jensen H. Routine vaccinations and child survival: follow up study in Guinea-Bissau, West Africa. *BMJ* 2000;321(7274):1435-8. [published Online First: 2000/12/09]
12. Fisker AB, Hornshoj L, Rodrigues A, et al. Effects of the introduction of new vaccines in Guinea-Bissau on vaccine coverage, vaccine timeliness, and child survival: an observational study. *The lancet global health* 2014;2(8):e478-87. doi: 10.1016/S2214-109X(14)70274-8 [published Online First: 24-07-2014]
13. Aaby P, Martins CL, Garly ML, et al. Non-specific effects of standard measles vaccine at 4.5 and 9 months of age on childhood mortality: randomised controlled trial. *BMJ* 2010;341:c6495. doi: 10.1136/bmj.c6495 [published Online First: 2010/12/02]
14. World Health Organization. Summary of the SAGE April 2014 meeting 2014 [Available from: [http://www.who.int/immunization/sage/meetings/2014/april/report\\_summary\\_april\\_2014/en/](http://www.who.int/immunization/sage/meetings/2014/april/report_summary_april_2014/en/) accessed 10-04-2014 2014.
15. Aaby P, Jensen H, Gomes J, et al. The introduction of diphtheria-tetanus-pertussis vaccine and child mortality in rural Guinea-Bissau: an observational study. *Int J Epidemiol* 2004;33(2):374-80. doi: 10.1093/ije/dyh005 [published Online First: 2004/04/15]
16. Mogensen SW, Andersen A, Rodrigues A, et al. The Introduction of Diphtheria-Tetanus-Pertussis and Oral Polio Vaccine Among Young Infants in an Urban African Community: A Natural Experiment. *EBioMedicine* 2017;17:192-98. doi: 10.1016/j.ebiom.2017.01.041
17. Aaby P, Mogensen SW, Rodrigues A, et al. Evidence of Increase in Mortality After the Introduction of Diphtheria-Tetanus-Pertussis Vaccine to Children Aged 6-35 Months in Guinea-Bissau: A Time for Reflection? *Front Public Health* 2018;6:79. doi: 10.3389/fpubh.2018.00079 [published Online First: 2018/04/05]

18. Welaga P, Nielsen J, Adjuik M, et al. Non-specific effects of diphtheria-tetanus-pertussis and measles vaccinations? An analysis of surveillance data from Navrongo, Ghana. *Trop Med Int Health* 2012;17(12):1492-505. doi: 10.1111/j.1365-3156.2012.03093.x
19. Agergaard J, Nante E, Poulstrup G, et al. Diphtheria-tetanus-pertussis vaccine administered simultaneously with measles vaccine is associated with increased morbidity and poor growth in girls. A randomised trial from Guinea-Bissau. *Vaccine* 2011;29(3):487-500.
20. Aaby P, Benn C, Nielsen J, et al. Testing the hypothesis that diphtheria-tetanus-pertussis vaccine has negative non-specific and sex-differential effects on child survival in high-mortality countries. *BMJ open* 2012;2(3):e000707. doi: 10.1136/bmjopen-2011-000707 [published Online First: 2012/05/24]
21. Aaby P, Garly ML, Nielsen J, et al. Increased female-male mortality ratio associated with inactivated polio and diphtheria-tetanus-pertussis vaccines: Observations from vaccination trials in Guinea-Bissau. *Pediatr Infect Dis J* 2007;26(3):247-52. doi: 10.1097/01.inf.0000256735.05098.01 [published Online First: 2007/05/09]
22. Aaby P, Ravn H, Benn CS. The WHO Review of the Possible Non-Specific Effects of Diphtheria-Tetanus-Pertussis Vaccine. *Pediatr Infect Dis J* 2016;35(11):1247-57. doi: 10.1097/INF.0000000000001269
23. Benn CS, Aaby P. Diphtheria-tetanus-pertussis vaccination administered after measles vaccine: increased female mortality? *Pediatr Infect Dis J* 2012;31(10):1095-7. doi: 10.1097/INF.0b013e318263135e [published Online First: 2012/06/12]
24. Aaby P, Biai S, Veirum JE, et al. DTP with or after measles vaccination is associated with increased in-hospital mortality in Guinea-Bissau. *Vaccine* 2007;25(7):1265-9. doi: 10.1016/j.vaccine.2006.10.007
25. Aaby P, Jensen H, Samb B, et al. Differences in female-male mortality after high-titre measles vaccine and association with subsequent vaccination with diphtheria-tetanus-pertussis and inactivated poliovirus: reanalysis of West African studies. *Lancet* 2003;361(9376):2183-8. doi: 10.1016/S0140-6736(03)13771-3
26. Fisker AB, Ravn H, Rodrigues A, et al. Co-administration of live measles and yellow fever vaccines and inactivated pentavalent vaccines is associated with increased mortality compared with measles and yellow fever vaccines only. An observational study from Guinea-Bissau. *Vaccine* 2014;32(5):598-605. doi: 10.1016/j.vaccine.2013.11.074
27. Welaga P, Oduro A, Debpuur C, et al. Fewer out-of-sequence vaccinations and reduction of child mortality in Northern Ghana. *Vaccine* 2017;35(18):2496-503. doi: 10.1016/j.vaccine.2017.03.004
28. Aaby P, Ravn H, Benn CS, et al. Randomized Trials Comparing Inactivated Vaccine After Medium- or High-titer Measles Vaccine With Standard Titer Measles Vaccine After Inactivated Vaccine: A Meta-analysis. *Pediatr Infect Dis J* 2016;35(11):1232-41. doi: 10.1097/INF.0000000000001300
29. Meeting of the Strategic Advisory Group of Experts on immunization, April 2016 - conclusions and recommendations. *Wkly Epidemiol Rec* 2016;91(21):266-84. [published Online First: 2016/05/31]
30. World Health Organization. Multicentre Growth Reference Study Group. WHO Child Growth Standards: Length/height-for-age, weight-for-age, weight-for-length, weight-for-height and body mass index-for-age: Methods and development. Geneva: World Health Organisation, 2006.
31. Jensen H, Benn CS, Lisse IM, et al. Survival bias in observational studies of the impact of routine immunizations on childhood survival. *Trop Med Int Health* 2007;12(1):5-14. doi: 10.1111/j.1365-3156.2006.01773.x [published Online First: 2007/01/09]
32. Fisker AB, Thysen SM. Non-live pentavalent vaccines after live measles vaccine may increase mortality. *Vaccine* 2018;36(41):6039-42. doi: 10.1016/j.vaccine.2018.08.083. [published Online First: 2018/09/10]
33. Aaby P, Ibrahim SA, Libman MD, et al. The sequence of vaccinations and increased female mortality after high-titre measles vaccine: trials from rural Sudan and Kinshasa. *Vaccine* 2006;24(15):2764-71. doi: 10.1016/j.vaccine.2006.01.004 [published Online First: 2006/02/07]
34. Aaby P, Jensen H, Walraven G. Age-specific changes in the female-male mortality ratio related to the pattern of vaccinations: an observational study from rural Gambia. *Vaccine* 2006;24(22):4701-8. doi: 10.1016/j.vaccine.2006.03.038 [published Online First: 2006/04/20]
35. Hirve S, Bavdekar A, Juvekar S, et al. Non-specific and sex-differential effects of vaccinations on child survival in rural western India. *Vaccine* 2012;30(50):7300-8. doi: 10.1016/j.vaccine.2012.09.035

- 1  
2  
3  
4 36. Sorup S, Benn CS, Poulsen A, et al. Live vaccine against measles, mumps, and rubella and the risk of hospital  
5 admissions for nontargeted infections. *JAMA* 2014;311(8):826-35. doi: 10.1001/jama.2014.470  
6  
7 37. Sorup S, Benn CS, Poulsen A, et al. Simultaneous vaccination with MMR and DTaP-IPV-Hib and rate of hospital  
8 admissions with any infections: A nationwide register based cohort study. *Vaccine* 2016;34(50):6172-80.  
9 doi: doi: 10.1016/j.vaccine.2016.11.005 [published Online First: 2016/11/15]  
10 38. Liu L, Hill K, Oza S, et al. Levels and Causes of Mortality under Age Five Years. In: Black RE, Laxminarayan R,  
11 Temmerman M, et al., eds. Reproductive, Maternal, Newborn, and Child Health: Disease Control  
12 Priorities: World Bank, 2016.  
13 39. UNICEF. 2016 [updated Aug 2016. Available from: <http://data.unicef.org/topic/child-health/immunization/>  
14 accessed September 29 2016.  
15 40. Krishnan A, Srivastava R, Dwivedi P, et al. Non-specific sex-differential effect of DTP vaccination may partially  
16 explain the excess girl child mortality in Ballabgarh, India. *Trop Med Int Health* 2013;18(11):1329-37. doi:  
17 10.1111/tmi.12192  
18  
19  
20  
21  
22  
23  
24  
25  
26  
27  
28  
29  
30  
31  
32  
33  
34  
35  
36  
37  
38  
39  
40  
41  
42  
43  
44  
45  
46  
47  
48  
49  
50  
51  
52  
53  
54  
55  
56  
57  
58  
59  
60

**Figure 1** Overall mortality rate among children visited between 9 and 35 months of age.

Note: The figure plots the unadjusted mortality rates for children with a vaccination card seen between 9-35 months of age. The smoothed mortality curve starts shortly before 12 months of age, where the first event occurs. Only few children contribute with observation time between 9 and 12 months.

For peer review only

**Figure 2 Flowchart of children included and excluded from the analysis**

1  
2  
3  
4  
5  
6  
7  
8  
9  
10  
11  
12  
13  
14  
15  
16  
17  
18  
19  
20  
21  
22  
23  
24  
25  
26  
27  
28  
29  
30  
31  
32  
33  
34  
35  
36  
37  
38  
39  
40  
41  
42  
43  
44  
45  
46

For peer review only

**Figure 3** Mortality rate according to sequence of DTP and MV vaccinations among children visited between 9 and 35 months of age.

Note: The figure plots unadjusted mortality rates by vaccination status (in-sequence vs out-of-sequence vaccinations) among children with a vaccination card seen between 9-35 months of age. The smoothed mortality curve starts shortly before 12 months of age, where the first event occurs. Only few children contribute with observation time between 9 and 12 months.

For peer review only



**Table 1 - Baseline characteristics for observations of children (9-17 months old) included in the analyses by vaccination group**

|                                                                         | <b>DTP&lt;MV</b>   | <b>DTP=MV</b>      | <b>DTP&gt;MV</b>   | <b>DTP, no MV</b>  | <b>No DTP, no MV</b> | <b>p-value</b> |
|-------------------------------------------------------------------------|--------------------|--------------------|--------------------|--------------------|----------------------|----------------|
| Numbers (%)                                                             | 1590 (27)          | 1491 (25)          | 493 (8)            | 1816 (31)          | 547 (9)              |                |
| <b>Sex</b>                                                              |                    |                    |                    |                    |                      | .29            |
| Male (%)                                                                | 834 (52)           | 729 (49)           | 255 (52)           | 931 (51)           | 290 (53)             |                |
| Female (%)                                                              | 756 (48)           | 762 (51)           | 238 (48)           | 885 (49)           | 257 (47)             |                |
| <b>Median age in months at start of follow-up (interquartile range)</b> | 14.0 (11.8 – 15.9) | 13.8 (11.9 – 16.0) | 15.3 (13.6 – 16.8) | 11.4 (10.0 - 13.5) | 12.0 (10.4 – 14.7)   | <0.0001        |
| <b>MUAC z-score at start of Follow-up</b>                               | -0.93 (1.09)       | -1.09 (1.05)       | -1.16 (1.08)       | -1.09 (1.13)       | -1.13 (1.13)         | <0.0001        |
| <b>Region</b>                                                           |                    |                    |                    |                    |                      | <0.0001        |
| Oio                                                                     | 303 (19)           | 337 (23)           | 87 (18)            | 413 (23)           | 167 (31)             |                |
| Biombo                                                                  | 405 (25)           | 283 (19)           | 108 (22)           | 386 (21)           | 147 (27)             |                |
| Gabu                                                                    | 158 (10)           | 484 (32)           | 184 (37)           | 437 (24)           | 87 (16)              |                |
| Cacheu                                                                  | 353 (22)           | 125 (8)            | 37 (8)             | 226 (12)           | 46 (8)               |                |
| Bafata                                                                  | 371 (23)           | 262 (18)           | 77 (16)            | 354 (19)           | 100 (18)             |                |
| <b>Ethnicity</b>                                                        |                    |                    |                    |                    |                      | <0.0001        |
| Balanta                                                                 | 220 (14)           | 179 (12)           | 38 (8)             | 323 (18)           | 177 (33)             |                |
| Pepel                                                                   | 338 (21)           | 228 (16)           | 98 (20)            | 316 (18)           | 137 (25)             |                |
| Fula/Mandinca                                                           | 703 (45)           | 921 (63)           | 296 (61)           | 950 (53)           | 183 (34)             |                |
| Manjaco                                                                 | 106 (7)            | 44 (3)             | 9 (2)              | 81 (4)             | 25 (5)               |                |
| Other                                                                   | 208 (13)           | 96 (7)             | 45 (9)             | 134 (7)            | 18 (3)               |                |
| <b>Median maternal age in years (interquartile range)</b>               | 25.6 (20.6 - 30.8) | 26 (21.2 - 30.6)   | 25.9 (21.3 - 31)   | 26.2 (20.8 - 30.9) | 26.8 (21.3 - 31.5)   | .05            |
| <b>Education of caretaker</b>                                           |                    |                    |                    |                    |                      | <0.0001        |
| 0 years                                                                 | 1290 (81)          | 1302 (87)          | 426 (86)           | 1562 (86)          | 485 (89)             |                |
| 1-4 years                                                               | 198 (12)           | 143 (10)           | 52 (11)            | 179 (10)           | 44 (8)               |                |
| >4 years                                                                | 77 (5)             | 15 (1)             | 6 (1)              | 45 (2)             | 3 (1)                |                |
| <b>Time since MV/ Time since DTP after MV in days</b>                   | 105 (52 - 169)     | 85 (38 - 154)      | 66 (30 - 108)      | 161 (98 - 238)     | N/A                  | <0.0001        |

<sup>1</sup> 503 observations with missing MUAC

<sup>2</sup> 64 observations with missing information on ethnicity

<sup>3</sup> 63 observations with missing information on maternal age

<sup>4</sup> 110 observations with missing information on education of caretaker

1  
2  
3  
4  
5  
6  
7  
8  
9  
10  
11  
12  
13  
14  
15  
16  
17  
18  
19  
20  
21  
22  
23  
24  
25  
26  
27  
28  
29  
30  
31  
32  
33  
34  
35  
36  
37  
38  
39  
40  
41  
42  
43  
44  
45  
46

For peer review only

**Table 2 - Main analysis: Mortality of children visited between 9 and 17 months of age according to vaccination group**

| Vaccination status                          | Observations<br>N | MR per 1000<br>PYRS<br>(deaths/PYRS) | MRR<br>(95% CI)         | Boys              |                                      |                         | Girls             |                                      |                          |
|---------------------------------------------|-------------------|--------------------------------------|-------------------------|-------------------|--------------------------------------|-------------------------|-------------------|--------------------------------------|--------------------------|
|                                             |                   |                                      |                         | Observations<br>N | MR per 1000<br>PYRS<br>(deaths/PYRS) | MRR<br>(95% CI)         | Observations<br>N | MR per 1000<br>PYRS<br>(deaths/PYRS) | MRR<br>(95% CI)          |
| DTP < MV                                    | 1590              | 32.6 (16/491)                        | Ref                     | 834               | 34.8 (9/258)                         | Ref                     | 756               | 30.1 (7/232)                         | Ref                      |
| DTP = MV                                    | 1491              | 63.7 (29/455)                        | <b>2.30 (1.15-4.58)</b> | 729               | 63.6 (14/220)                        | 2.08 (0.83-5.26)        | 762               | 63.8 (15/235)                        | 2.50 (0.88-7.12)         |
| DTP > MV                                    | 493               | 43.1 (5/116)                         | 1.45 (0.50-4.22)        | 255               | 51.5 (3/58)                          | 1.48 (0.37-5.88)        | 238               | 34.6 (2/58)                          | 1.38 (0.25-7.52)         |
| DTP, no MV                                  | 1816              | 78.8 (57/723)                        | <b>2.57 (1.37-4.83)</b> | 931               | 102.3 (38/372)                       | <b>3.41 (1.50-7.77)</b> | 885               | 54.1 (19/351)                        | 1.67 (0.62-4.50)         |
| No DTP, no MV                               | 547               | 111.3 (22/198)                       | <b>3.04 (1.41-6.55)</b> | 290               | 95.3 (10/105)                        | 2.77 (0.97-7.97)        | 257               | 129.5 (12/93)                        | <b>3.28 (1.06-10.12)</b> |
| Out-of-sequence<br>vaccinations<br>combined |                   |                                      |                         |                   |                                      |                         |                   |                                      |                          |
| DTP>=MV                                     | 1984              | 59.5 (34/571)                        | <b>2.10 (1.07-4.11)</b> | 984               | 61.1 (17/278)                        | 1.96 (0.80-4.78)        | 1000              | 58.0 (17/293)                        | 2.25 (0.81-6.30)         |

Note: Mortality rate ratios were calculated using Cox proportional hazards models with age as underlying time, stratified by sex and village cluster.

**Table 3 - Mortality of children visited between 9 and 18 months of age according to vaccination group with follow up censored at 2 months after entry into the analysis**

| Vaccination status                          | Observations<br>N | MR per 1000<br>PYRS<br>(deaths/PYRS) | MRR<br>(95% CI)         | Boys              |                                      |                   | Girls             |                                      |                            |
|---------------------------------------------|-------------------|--------------------------------------|-------------------------|-------------------|--------------------------------------|-------------------|-------------------|--------------------------------------|----------------------------|
|                                             |                   |                                      |                         | Observations<br>N | MR per 1000<br>PYRS<br>(deaths/PYRS) | MRR<br>(95% CI)   | Observations<br>N | MR per 1000<br>PYRS<br>(deaths/PYRS) | MRR<br>(95% CI)            |
| DTP < MV                                    | 1590              | 25.8 (6/233)                         | Ref                     | 834               | 32.9 (4/122)                         | Ref               | 756               | 18.0 (2/111)                         | Ref                        |
| DTP = MV                                    | 1491              | 60.5 (13/215)                        | 2.34 (0.77-7.12)        | 729               | 38.2 (4/105)                         | 1.16 (0.27-5.07)  | 762               | 81.8 (9/110)                         | 6.71 (0.77-58.26)          |
| DTP > MV                                    | 493               | 60.4 (4/66)                          | 3.30 (0.77-14.14)       | 255               | 58.8 (2/34)                          | 1.61 (0.26-10.18) | 238               | 62.1 (2/32)                          | <b>14.61 (1.01-210.68)</b> |
| DTP, no MV                                  | 1816              | 93.4 (27/289)                        | <b>3.47 (1.24-9.69)</b> | 931               | 127.8 (19/149)                       | 2.56 (0.80-8.24)  | 885               | 57.0 (8/140)                         | 6.34 (0.72-55.92)          |
| No DTP, no MV                               | 547               | 130.3 (11/84)                        | 3.35 (1.00-11.26)       | 290               | 88.6 (4/45)                          | 1.19 (0.24-5.90)  | 257               | 178.3 (7/39)                         | <b>14.73 (1.55-140.27)</b> |
| Out-of-sequence<br>vaccinations<br>combined |                   |                                      |                         |                   |                                      |                   |                   |                                      |                            |
| DTP>=MV                                     | 1984              | 60.5 (17/281)                        | 2.51 (0.86-7.35)        | 984               | 43.2 (6/139)                         | 1.26 (0.32-4.85)  | 1000              | 77.4 (11/142)                        | 7.83 (0.90-67.83)          |

Note: Mortality rate ratios were calculated using Cox proportional hazards models with age as underlying time, stratified by sex and village cluster.

1  
2  
3  
4  
5  
6  
7  
8  
9  
10  
11  
12  
13  
14  
15  
16  
17  
18  
19  
20  
21  
22  
23  
24  
25  
26  
27  
28  
29  
30  
31  
32  
33  
34  
35  
36  
37  
38  
39  
40  
41  
42  
43  
44  
45  
46  
47  
48  
49  
50  
51  
52  
53  
54  
55  
56  
57  
58  
59  
60

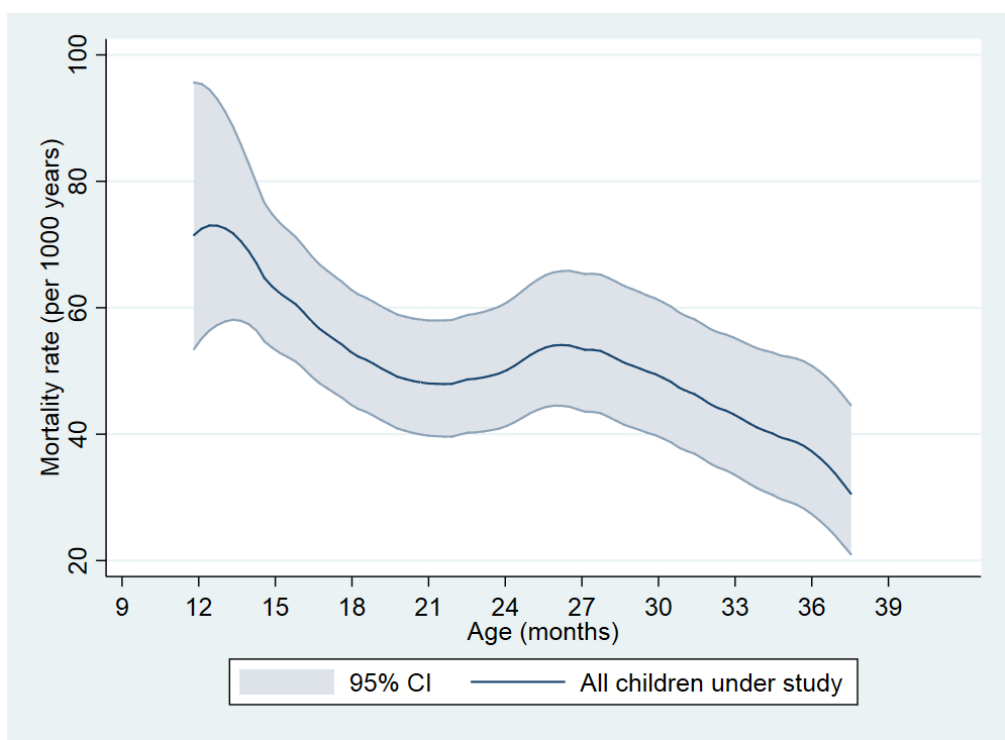

Overall mortality rate among children visited between 9 and 35 months of age.

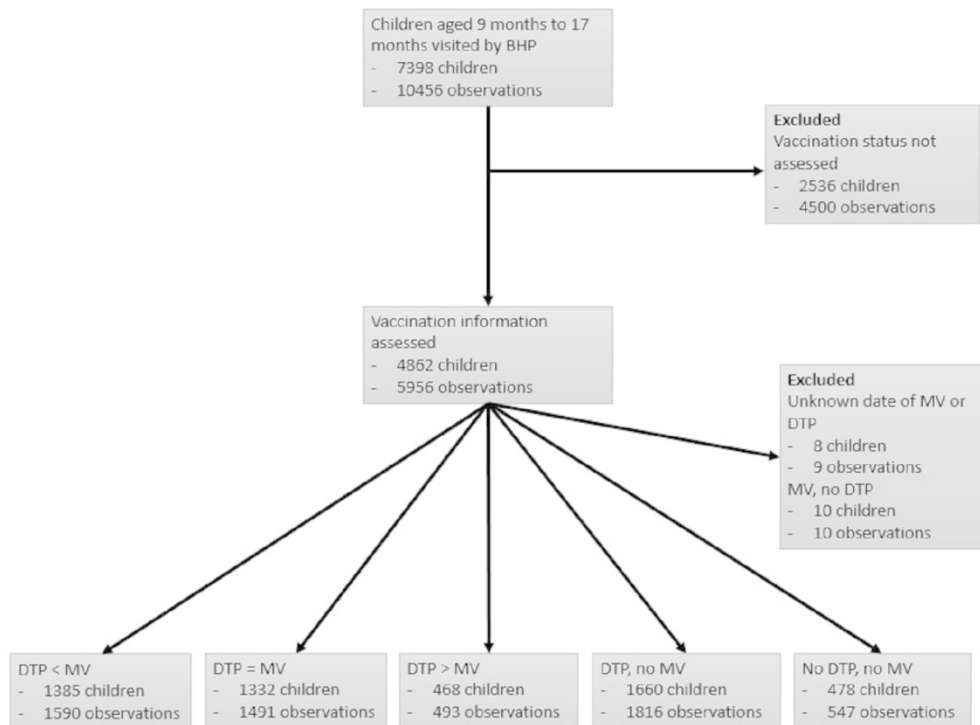

Flowchart of children included and excluded from the analysis

127x93mm (300 x 300 DPI)

1  
2  
3  
4  
5  
6  
7  
8  
9  
10  
11  
12  
13  
14  
15  
16  
17  
18  
19  
20  
21  
22  
23  
24  
25  
26  
27  
28  
29  
30  
31  
32  
33  
34  
35  
36  
37  
38  
39  
40  
41  
42  
43  
44  
45  
46  
47  
48  
49  
50  
51  
52  
53  
54  
55  
56  
57  
58  
59  
60

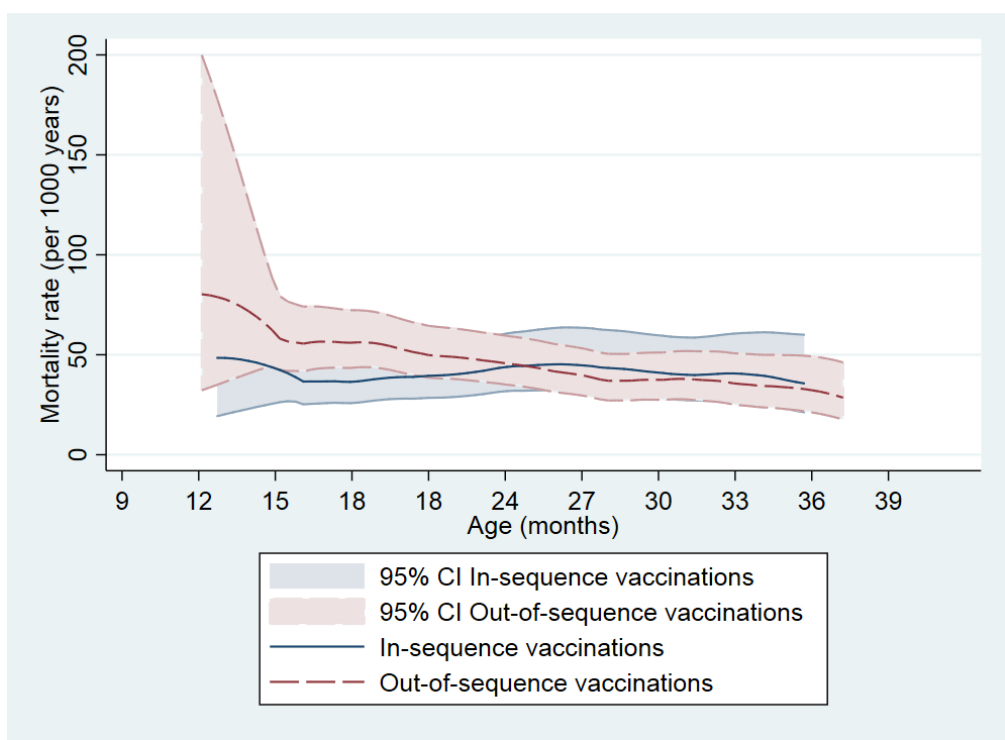

Mortality rate according to sequence of DTP and MV vaccinations among children visited between 9 and 35 months of age.

**Supplementary table 1 - Baseline characteristics among children included and excluded from the analyses**

|                                                                         | Included           | Excluded           | p-value |
|-------------------------------------------------------------------------|--------------------|--------------------|---------|
| Numbers (%)                                                             | 5937 (57)          | 4519 (43)          |         |
| <b>Sex</b>                                                              |                    |                    | .11     |
| Male (%)                                                                | 3039 (51)          | 2242 (50)          |         |
| Female (%)                                                              | 2898 (49)          | 2277 (50)          |         |
| <b>Median age in months at start of follow-up (interquartile range)</b> | 13.1 (11.0 – 15.5) | 13.4 (11.1 – 15.7) | 0.0005  |
| <b>MUAC at start of Follow-up<sup>1</sup></b>                           | -1.06 (1.1)        | -1.09 (1.12)       | .42     |
| <b>Region</b>                                                           |                    |                    | <0.0001 |
| Oio                                                                     | 1307 (22)          | 969 (21)           |         |
| Biombo                                                                  | 1329 (22)          | 1380 (31)          |         |
| Gabu                                                                    | 1350 (23)          | 803 (18)           |         |
| Cacheu                                                                  | 787 (13)           | 692 (15)           |         |
| Bafata                                                                  | 1164 (20)          | 675 (15)           |         |
| <b>Ethnicity<sup>2</sup></b>                                            |                    |                    | <0.0001 |
| Balanta                                                                 | 937 (16)           | 926 (21)           |         |
| Pepel                                                                   | 1117 (19)          | 1172 (26)          |         |
| Fula/Mandinca                                                           | 3053 (52)          | 1728 (39)          |         |
| Manjaco                                                                 | 265 (5)            | 270 (6)            |         |
| Other                                                                   | 501 (9)            | 369 (8)            |         |
| <b>Median maternal age in years (interquartile range)<sup>3</sup></b>   | 26 (20.9 - 30.8)   | 25.3 (20.4 - 30)   | <0.0001 |
| <b>Education of caretaker<sup>4</sup></b>                               |                    |                    | 0.95    |
| 0 years                                                                 | 5065 (85)          | 3805 (84)          |         |
| 1-4 years                                                               | 616 (10)           | 472 (10)           |         |
| >4 years                                                                | 146 (2)            | 111 (2)            |         |

<sup>1</sup> 3731 observations with missing MUAC

<sup>2</sup> 118 observations with missing information on ethnicity

<sup>3</sup> 116 observations with missing information on maternal age

<sup>4</sup> 241 observations with missing information on education of caretaker



Supplementary table 2 - Mortality of children visited between 18 and 35 months of age according to vaccination group

| Vaccination status                          | Observations<br>N | MR per 1000<br>PYRS<br>(deaths/PYRS) | MRR<br>(95% CI)         | Boys              |                                      |                  | Girls             |                                      |                         |
|---------------------------------------------|-------------------|--------------------------------------|-------------------------|-------------------|--------------------------------------|------------------|-------------------|--------------------------------------|-------------------------|
|                                             |                   |                                      |                         | Observations<br>N | MR per 1000<br>PYRS<br>(deaths/PYRS) | MRR<br>(95% CI)  | Observations<br>N | MR per 1000<br>PYRS<br>(deaths/PYRS) | MRR<br>(95% CI)         |
| DTP < MV                                    | 2415              | 39.9 (46/1154)                       | Ref                     | 1249              | 45.2 (27/598)                        | Ref              | 1166              | 34.1 (19/557)                        | Ref                     |
| DTP = MV                                    | 2065              | 47.0 (46/978)                        | 0.98 (0.62-1.54)        | 1031              | 57.5 (28/487)                        | 1.06 (0.59-1.92) | 1034              | 36.7 (18/491)                        | 0.85 (0.42-1.71)        |
| DTP > MV                                    | 1940              | 31.3 (29/927)                        | 0.62 (0.36-1.06)        | 954               | 41.4 (19/458)                        | 0.83 (0.42-1.63) | 986               | 21.3 (10/469)                        | <b>0.39 (0.16-0.94)</b> |
| DTP, no MV                                  | 580               | 65.9 (18/273)                        | 1.40 (0.77-2.55)        | 278               | 76.2 (10/131)                        | 1.39 (0.63-3.05) | 302               | 56.3 (8/142)                         | 1.37 (0.55-3.42)        |
| No DTP, no MV                               | 502               | 112.0 (26/232)                       | <b>2.18 (1.21-3.90)</b> | 238               | 71.0 (8/113)                         | 1.58 (0.64-3.91) | 264               | 150.8 (18/119)                       | <b>2.68 (1.21-5.94)</b> |
| Out-of-sequence<br>vaccinations<br>combined |                   |                                      |                         |                   |                                      |                  |                   |                                      |                         |
| DTP>=MV                                     | 4005              | 39.4 (75/1,905)                      | 0.82 (0.54-1.24)        | 1985              | 49.7 (47/946)                        | 0.96 (0.56-1.67) | 2020              | 29.2 (28/960)                        | 0.64 (0.33-1.24)        |

Note: Mortality rate ratios were calculated using Cox proportional hazards models with age as underlying time, stratified by sex and village cluster.

Review only

**Supplementary table 3 - Registered vaccinations during follow-up (FU) period among those with vaccination status assessed again**

|                                                   | Observations<br>N | Seen card<br>after visit | Vaccinated during FU |           |           |          |
|---------------------------------------------------|-------------------|--------------------------|----------------------|-----------|-----------|----------|
|                                                   |                   |                          | DTP                  | MV        | Polio     | BCG      |
| <b>9-17 months of age<br/>Vaccination status</b>  |                   |                          |                      |           |           |          |
| DTP < MV                                          | 1590              | 1427                     | 31 (2%)              | 0 (0%)    | 51 (4%)   | 3 (0%)   |
| DTP = MV                                          | 1491              | 1324                     | 310 (23%)            | 0 (0%)    | 316 (24%) | 5 (0%)   |
| DTP > MV                                          | 493               | 433                      | 67 (15%)             | 0 (0%)    | 73 (17%)  | 0 (0%)   |
| DTP, no MV                                        | 1816              | 1561                     | 569 (36%)            | 866 (55%) | 576 (37%) | 14 (1%)  |
| No DTP, no MV                                     | 547               | 516                      | 120 (23%)            | 102 (20%) | 118 (23%) | 78 (15%) |
| <b>18-35 months of age<br/>Vaccination status</b> |                   |                          |                      |           |           |          |
| DTP < MV                                          | 2415              | 2053                     | 18 (1%)              | 1 (0%)    | 38 (2%)   | 0 (0%)   |
| DTP = MV                                          | 2065              | 1726                     | 150 (9%)             | 0 (0%)    | 156 (9%)  | 2 (0%)   |
| DTP > MV                                          | 1940              | 1648                     | 75 (5%)              | 0 (0%)    | 82 (5%)   | 1 (0%)   |
| DTP, no MV                                        | 580               | 429                      | 77 (18%)             | 104 (24%) | 79 (18%)  | 0 (0%)   |
| No DTP, no MV                                     | 502               | 462                      | 24 (5%)              | 19 (4%)   | 23 (5%)   | 13 (3%)  |

1  
 2 **Supplementary table 4 - Mortality of children, who had received 3 doses of DTP, visited between 9 and 17 months of age according to**  
 3  
 4 **vaccination group**

| Vaccination status                          | Observations<br>N | MR per 1000<br>PYRS<br>(deaths/PYRS) | MRR<br>(95% CI)         | Boys              |                                      |                  | Girls             |                                      |                          |
|---------------------------------------------|-------------------|--------------------------------------|-------------------------|-------------------|--------------------------------------|------------------|-------------------|--------------------------------------|--------------------------|
|                                             |                   |                                      |                         | Observations<br>N | MR per 1000<br>PYRS<br>(deaths/PYRS) | MRR<br>(95% CI)  | Observations<br>N | MR per 1000<br>PYRS<br>(deaths/PYRS) | MRR<br>(95% CI)          |
| DTP3 < MV                                   | 1492              | 30.4 (14/460)                        | Ref                     | 774               | 37.7 (9/239)                         | Ref              | 718               | 22.6 (5/221)                         | Ref                      |
| DTP3 = MV                                   | 882               | 49.6 (13/262)                        | 2.07 (0.88-4.86)        | 422               | 64.5 (8/124)                         | 1.77 (0.61-5.15) | 460               | 36.3 (5/138)                         | 2.64 (0.65-10.73)        |
| DTP3 > MV                                   | 363               | 35.8 (3/84)                          | 1.27 (0.33-4.81)        | 191               | 23.2 (1/43)                          | 0.76 (0.09-6.43) | 172               | 49.1 (2/41)                          | 2.09 (0.34-12.86)        |
| DTP3, no MV                                 | 634               | 78.4 (20/255)                        | <b>3.01 (1.42-6.34)</b> | 334               | 88.1 (12/136)                        | 2.56 (0.97-6.74) | 300               | 67.4 (8/119)                         | <b>3.80 (1.17-12.33)</b> |
| Out-of-sequence<br>vaccinations<br>combined |                   |                                      |                         |                   |                                      |                  |                   |                                      |                          |
| DTP3>=MV                                    | 1245              | 46.3 (16/346)                        | 1.85 (0.82-4.16)        | 613               | 53.8 (9/167)                         | 1.53 (0.54-4.29) | 632               | 39.2 (7/179)                         | 2.46 (0.67-9.09)         |

20 Note: Mortality rate ratios were calculated using Cox proportional hazards models with age as underlying time, stratified by sex and village cluster

Review only

## STROBE Statement—checklist of items that should be included in reports of observational studies

|                              | Item No. | Recommendation                                                                                                                                                                             | Page No. | Relevant text from manuscript |
|------------------------------|----------|--------------------------------------------------------------------------------------------------------------------------------------------------------------------------------------------|----------|-------------------------------|
| <b>Title and abstract</b>    | 1        | (a) Indicate the study's design with a commonly used term in the title or the abstract                                                                                                     | 1        |                               |
|                              |          | (b) Provide in the abstract an informative and balanced summary of what was done and what was found                                                                                        | 3        |                               |
| <b>Introduction</b>          |          |                                                                                                                                                                                            |          |                               |
| Background/rationale         | 2        | Explain the scientific background and rationale for the investigation being reported                                                                                                       | 4-5      |                               |
| Objectives                   | 3        | State specific objectives, including any prespecified hypotheses                                                                                                                           | 5        |                               |
| <b>Methods</b>               |          |                                                                                                                                                                                            |          |                               |
| Study design                 | 4        | Present key elements of study design early in the paper                                                                                                                                    | 5-6      |                               |
| Setting                      | 5        | Describe the setting, locations, and relevant dates, including periods of recruitment, exposure, follow-up, and data collection                                                            | 5        |                               |
| Participants                 | 6        | (a) <i>Cohort study</i> —Give the eligibility criteria, and the sources and methods of selection of participants. Describe methods of follow-up                                            | 6        |                               |
|                              |          | <i>Case-control study</i> —Give the eligibility criteria, and the sources and methods of case ascertainment and control selection. Give the rationale for the choice of cases and controls |          |                               |
|                              |          | <i>Cross-sectional study</i> —Give the eligibility criteria, and the sources and methods of selection of participants                                                                      |          |                               |
|                              |          | (b) <i>Cohort study</i> —For matched studies, give matching criteria and number of exposed and unexposed                                                                                   |          |                               |
|                              |          | <i>Case-control study</i> —For matched studies, give matching criteria and the number of controls per case                                                                                 |          |                               |
| Variables                    | 7        | Clearly define all outcomes, exposures, predictors, potential confounders, and effect modifiers. Give diagnostic criteria, if applicable                                                   | 6        |                               |
| Data sources/<br>measurement | 8*       | For each variable of interest, give sources of data and details of methods of assessment (measurement). Describe comparability of assessment methods if there is more than one group       | 5        |                               |
| Bias                         | 9        | Describe any efforts to address potential sources of bias                                                                                                                                  | 7        |                               |
| Study size                   | 10       | Explain how the study size was arrived at                                                                                                                                                  | 8        |                               |

Continued on next page

1  
2  
3  
4  
5  
6  
7  
8  
9  
10  
11  
12  
13  
14  
15  
16  
17  
18  
19  
20  
21  
22  
23  
24  
25  
26  
27  
28  
29  
30  
31  
32  
33  
34  
35  
36  
37  
38  
39  
40  
41  
42  
43  
44  
45  
46  
47

|                        |     |                                                                                                                                                                                                                                                                                                           |             |
|------------------------|-----|-----------------------------------------------------------------------------------------------------------------------------------------------------------------------------------------------------------------------------------------------------------------------------------------------------------|-------------|
| Quantitative variables | 11  | Explain how quantitative variables were handled in the analyses. If applicable, describe which groupings were chosen and why                                                                                                                                                                              | 6-7         |
| Statistical methods    | 12  | (a) Describe all statistical methods, including those used to control for confounding                                                                                                                                                                                                                     | 6-7         |
|                        |     | (b) Describe any methods used to examine subgroups and interactions                                                                                                                                                                                                                                       | 7           |
|                        |     | (c) Explain how missing data were addressed                                                                                                                                                                                                                                                               |             |
|                        |     | (d) <i>Cohort study</i> —If applicable, explain how loss to follow-up was addressed<br><i>Case-control study</i> —If applicable, explain how matching of cases and controls was addressed<br><i>Cross-sectional study</i> —If applicable, describe analytical methods taking account of sampling strategy |             |
|                        |     | (e) Describe any sensitivity analyses                                                                                                                                                                                                                                                                     | 7           |
| <b>Results</b>         |     |                                                                                                                                                                                                                                                                                                           |             |
| Participants           | 13* | (a) Report numbers of individuals at each stage of study—eg numbers potentially eligible, examined for eligibility, confirmed eligible, included in the study, completing follow-up, and analysed                                                                                                         | 8           |
|                        |     | (b) Give reasons for non-participation at each stage                                                                                                                                                                                                                                                      | Figure 1    |
|                        |     | (c) Consider use of a flow diagram                                                                                                                                                                                                                                                                        | Figure 1    |
| Descriptive data       | 14* | (a) Give characteristics of study participants (eg demographic, clinical, social) and information on exposures and potential confounders                                                                                                                                                                  | 8 + table 1 |
|                        |     | (b) Indicate number of participants with missing data for each variable of interest                                                                                                                                                                                                                       | Table 1     |
|                        |     | (c) <i>Cohort study</i> —Summarise follow-up time (eg, average and total amount)                                                                                                                                                                                                                          | Table 2     |
| Outcome data           | 15* | <i>Cohort study</i> —Report numbers of outcome events or summary measures over time                                                                                                                                                                                                                       | Table 2     |
|                        |     | <i>Case-control study</i> —Report numbers in each exposure category, or summary measures of exposure                                                                                                                                                                                                      |             |
|                        |     | <i>Cross-sectional study</i> —Report numbers of outcome events or summary measures                                                                                                                                                                                                                        |             |
| Main results           | 16  | (a) Give unadjusted estimates and, if applicable, confounder-adjusted estimates and their precision (eg, 95% confidence interval). Make clear which confounders were adjusted for and why they were included                                                                                              | 8 + Table 2 |
|                        |     | (b) Report category boundaries when continuous variables were categorized                                                                                                                                                                                                                                 | Table 1     |
|                        |     | (c) If relevant, consider translating estimates of relative risk into absolute risk for a meaningful time period                                                                                                                                                                                          |             |

Continued on next page

|                          |    |                                                                                                                                                                            |                                 |
|--------------------------|----|----------------------------------------------------------------------------------------------------------------------------------------------------------------------------|---------------------------------|
| Other analyses           | 17 | Report other analyses done—eg analyses of subgroups and interactions, and sensitivity analyses                                                                             | 9 + Table 3<br>+ Supp<br>tables |
| <b>Discussion</b>        |    |                                                                                                                                                                            |                                 |
| Key results              | 18 | Summarise key results with reference to study objectives                                                                                                                   | 9                               |
| Limitations              | 19 | Discuss limitations of the study, taking into account sources of potential bias or imprecision. Discuss both direction and magnitude of any potential bias                 | 10                              |
| Interpretation           | 20 | Give a cautious overall interpretation of results considering objectives, limitations, multiplicity of analyses, results from similar studies, and other relevant evidence | 11-12                           |
| Generalisability         | 21 | Discuss the generalisability (external validity) of the study results                                                                                                      | 10-12                           |
| <b>Other information</b> |    |                                                                                                                                                                            |                                 |
| Funding                  | 22 | Give the source of funding and the role of the funders for the present study and, if applicable, for the original study on which the present article is based              | 13                              |

\*Give information separately for cases and controls in case-control studies and, if applicable, for exposed and unexposed groups in cohort and cross-sectional studies.

**Note:** An Explanation and Elaboration article discusses each checklist item and gives methodological background and published examples of transparent reporting. The STROBE checklist is best used in conjunction with this article (freely available on the Web sites of PLoS Medicine at <http://www.plosmedicine.org/>, Annals of Internal Medicine at <http://www.annals.org/>, and Epidemiology at <http://www.epidem.com/>). Information on the STROBE Initiative is available at [www.strobe-statement.org](http://www.strobe-statement.org).

# BMJ Open

## Out-of-sequence DTP and measles vaccinations and child mortality in Guinea-Bissau – a reanalysis

|                                 |                                                                                                                                                                                   |
|---------------------------------|-----------------------------------------------------------------------------------------------------------------------------------------------------------------------------------|
| Journal:                        | <i>BMJ Open</i>                                                                                                                                                                   |
| Manuscript ID                   | bmjopen-2018-024893.R2                                                                                                                                                            |
| Article Type:                   | Research                                                                                                                                                                          |
| Date Submitted by the Author:   | 06-Aug-2019                                                                                                                                                                       |
| Complete List of Authors:       | Thysen, Sanne; Bandim Health Project, Statens Serum Institut , Rodrigues, Amabelia; Bandim Health Project Aaby, Peter; Bandim Health Project, Fisker, Ane; Bandim Health Project, |
| <b>Primary Subject Heading</b>: | Global health                                                                                                                                                                     |
| Secondary Subject Heading:      | Epidemiology, Health policy, Infectious diseases, Paediatrics, Public health                                                                                                      |
| Keywords:                       | DTP vaccine, Measles vaccine, Child mortality, Vaccine sequence, Non-specific (heterologous) effects of vaccines                                                                  |
|                                 |                                                                                                                                                                                   |

SCHOLARONE™  
Manuscripts

1  
2  
3  
4 **Out-of-sequence DTP and measles vaccinations and child mortality in Guinea-Bissau – a reanalysis**  
5  
6  
7

8  
9 *Sanne Marie Thysen<sup>a,b,c,d</sup>, Amabelia Rodrigues<sup>b</sup>, Peter Aaby<sup>b,c</sup>, Ane Bærent Fisker<sup>a,b,c</sup>*  
10  
11  
12

13  
14 <sup>a</sup> OPEN, Institute of Clinical Research, University of Southern Denmark, Odense, Denmark

15 <sup>b</sup> Bandim Health Project, INDEPTH Network, Bissau, Guinea-Bissau

16  
17 <sup>c</sup> Research Centre for Vitamins and Vaccines, Bandim Health Project, Statens Serum Institut,  
18 Copenhagen, Denmark

19  
20 <sup>d</sup> Center for Global Health (GloHAU), Aarhus University, Aarhus, Denmark  
21  
22  
23

24  
25 Authors:

26  
27 Sanne Marie Thysen, [s.thysen@bandim.org](mailto:s.thysen@bandim.org)

28  
29 Amabelia Rodrigues, [a.rodriques@bandim.org](mailto:a.rodriques@bandim.org)

30  
31 Peter Aaby, [p.aaby@bandim.org](mailto:p.aaby@bandim.org)

32  
33 Ane Bærent Fisker, [a.fisker@bandim.org](mailto:a.fisker@bandim.org)  
34  
35  
36  
37  
38  
39  
40  
41

42 **Corresponding author:** Sanne Marie Thysen, Bandim Health Project, INDEPTH Network, Apartado  
43 861, 1004 Bissau Codex, Guinea-Bissau; [s.thysen@bandim.org](mailto:s.thysen@bandim.org)  
44  
45  
46  
47

48 **Keywords:** DTP vaccine, measles vaccine, child mortality, vaccine sequence, non-specific (heterologous)  
49 effects of vaccines  
50  
51

52 **Word count:** Abstract: 300, Manuscript: 3720  
53  
54  
55  
56  
57  
58  
59  
60



## Abstract

**Objectives** To assess whether the sequence of diphtheria-tetanus-pertussis vaccine (DTP) and measles vaccine (MV) was associated with child survival in a dataset previously used to assess non-specific effects of vaccines with no consideration of vaccination sequence.

**Design** Prospective cohort study analysed using the landmark approach.

**Setting** Bandim Health Project's Health and Demographic Surveillance System covering 100 village clusters in rural Guinea-Bissau. The recommended vaccination schedule was BCG and oral polio vaccine (OPV) at birth, DTP and OPV at 6, 10 and 14 weeks, MV at 9 months, and booster-DTP and OPV at 18 months of age.

**Participants** Children aged 9-17 months (main analysis) and 18-35 months (secondary analysis: age of booster DTP) with vaccination status assessed between April 1991 and April 1996.

**Methods** Survival during the six months after assessing vaccination status was compared by vaccination sequence in Cox-proportional hazards models with age as underlying time. Analyses were stratified by sex and village cluster.

**Main outcome measure** Mortality rate ratio (MRR) for out-of-sequence vaccinations compared with in-sequence vaccinations.

**Results** Among children aged 9-17 months, 60% of observations (3574/5937) were from children who had received both MV and DTP. Among these, 1590 observations were classified as in-sequence vaccinations (last DTP before MV), and 1984 observations were out-of-sequence vaccinations (1491: MV with DTP and 493: MV before DTP). Out-of-sequence vaccinations were associated with higher mortality than in-sequence vaccinations (MRR 2.10 (95% CI: 1.07-4.11)); the MRR was 2.30 (1.15-4.58) for MV with DTP and 1.45 (0.50-4.22) for DTP after MV). Associations were similar for boys and girls ( $p=0.77$ ). Between 18-35 months the mortality rate increased among children vaccinated in-sequence and the differential effect of out-of-sequence vaccinations disappeared.

**Conclusion** Out-of-sequence vaccinations may increase child mortality. Hence, sequence of vaccinations should be considered when planning vaccination programmes or introducing new vaccines into the current vaccination schedule.

#### Strengths and limitations of this study

- Vaccination status of the children were only updated at the inspection of a vaccination card. Hence, this study used the landmark analyses and thus prevented survival bias
- Misclassification of vaccinations due to the landmark approach would yield conservative estimates
- Booster doses of DTP were not registered before 1996, and we were therefore not able to make any firm conclusions of the effect of booster DTP
- Sensitivity analyses were conducted to limit the effect of vaccinations during follow-up

For peer review only

## Introduction

Child mortality has declined significantly between 2000 and 2015.<sup>1</sup> Part of this decline is due to a reduction in preventable childhood diseases much of which is commonly ascribed to vaccines.<sup>2</sup> Vaccines are designed to protect against specific pathogens.<sup>3</sup> However, vaccines may have broader effects aside from the disease-specific protection with the live vaccines stimulating the immune system and reducing mortality by more than can be explained by preventing the target infection.<sup>4-7</sup> Hence, due to beneficial non-specific effects (NSEs) of live vaccines, vaccines may have played an even larger role in the decline of childhood mortality than usually assumed.

Studies from the introduction of the measles vaccine (MV) in the 1970's and 1980's from Asia and Africa showed larger reductions in mortality than could be ascribed to the prevention of measles infection.<sup>8-10</sup> Both observational studies and randomised trials have later confirmed lower mortality among measles-vaccinated children compared with measles-unvaccinated children.<sup>11-13</sup> Based on accumulating evidence, WHO's Strategic Advisory Group of Experts on immunization (SAGE) recently reviewed the evidence for NSEs of some vaccines, and concluded that the evidence for MV was consistent with beneficial NSEs, especially for girls.<sup>7 14</sup>

The introduction of diphtheria-tetanus-pertussis vaccine (DTP) in the 1980's was associated with higher overall mortality, despite the protection against the specific diseases.<sup>15-17</sup> Other studies comparing mortality of DTP-vaccinated children and DTP-unvaccinated children have later confirmed the negative NSEs, especially for girls.<sup>11 18-21</sup> The WHO review of NSEs stated that beneficial or deleterious NSEs of DTP could not be confirmed nor refuted based on the evidence available.<sup>7 14</sup> However, the WHO review included studies with major survival bias; if the meta-analysis is restricted to studies with documentation of vaccination status and prospective follow-up, DTP-vaccinated children had two-fold higher mortality than DTP-unvaccinated children.<sup>22</sup>

Both observational studies<sup>18 20 23-27</sup> and randomised trials<sup>19 28</sup> suggest that the NSEs depends most strongly on the most recent vaccination and that sequence of vaccinations therefore is important. Randomised trials have compared inactivated vaccine after medium- or high-titre MV with standard-titre MV after inactivated vaccine. A meta-analysis of the trials indicates that receiving an inactivated vaccine after a live MV was associated with a mortality rate-ratio (MRR) of 1.38 (95% CI: 1.05-1.83) compared with receiving live MV after an inactivated vaccine, the negative effect being particularly strong for females.<sup>28</sup>

1  
2  
3  
4 In the first study that assessed the effect on mortality of MV and DTP, having received MV vs no MV  
5 was associated with a MRR of 0.48 (0.27-0.87); in contrast having received DTP vs no DTP was  
6 associated with higher mortality (MRR=1.84 (1.10-3.10)).<sup>11</sup> The analysis did not consider sequence of  
7 vaccinations, the potential importance of which had not yet been detected. We took advantage of this  
8 historical dataset<sup>11</sup> to test if the different sequences of DTP and MV vaccinations were associated with  
9 mortality. The issue is particularly important now because WHO is planning to add several non-live  
10 vaccines to the vaccination schedule,<sup>29</sup> including booster DTP and RTS,S malaria vaccine, and some will  
11 be given after MV.  
12  
13  
14  
15  
16  
17

## 18 **Methods**

### 19 *Setting*

20  
21  
22  
23 Data was collected within the Bandim Health Project's Health and Demographic Surveillance System  
24 (HDSS) in rural Guinea-Bissau. The HDSS was established in 1990 using the Expanded Programme on  
25 Immunizations (EPI) methodology, randomly selecting 20 clusters of 100 women in each of the five  
26 largest health regions. Women of fertile age and their children below 5 years of age were followed  
27 through biannual visits. Women were registered at 14-16 years of age or when they moved into the  
28 village and were followed to death or migration. Newly registered women were interviewed about their  
29 past obstetric history, age, ethnicity and whether they had attended school. Children were registered  
30 during pregnancy or when they moved into the village. Children were followed until death, migration or 5  
31 years of age.  
32  
33  
34  
35  
36  
37  
38

39  
40 At all visits, vaccination status, nutritional status and vital status were assessed. Vaccination status was  
41 assessed by inspection of a vaccination card. Children with no vaccination card and whose mother stated  
42 that the child had never received any vaccine were considered "unvaccinated". Only children with  
43 ascertained vaccination status (seen vaccination card, confirmed unvaccinated) were included in the  
44 analyses. Nutritional status was assessed by measurement of the child's mid-upper-arm circumference  
45 (MUAC).  
46  
47  
48  
49

### 50 *Vaccination programme and definition of exposure*

51  
52  
53 The vaccination schedule consisted of Bacillus Calmette-Guérin vaccine (BCG) and oral polio vaccine  
54 (OPV) at birth, 3 doses of DTP and OPV at 6, 10 and 14 weeks of age, MV at 9 months of age and  
55 booster doses of DTP and OPV at 18 months of age. The vaccination schedule did not change during the  
56 study period. Vaccinations were provided through the national immunization programme. Systematic  
57  
58  
59  
60

1  
2  
3  
4 registration of DTP and OPV booster doses were only initiated in 1996, and thus, booster doses were not  
5 registered during the study period.  
6  
7

8 Children were divided into 5 groups according to the most recent vaccination(s) at the time their  
9 vaccination card was inspected: One group consisted of children, who were vaccinated in the  
10 recommended sequence, having received MV after DTP (DTP<MV). Two groups were vaccinated out-  
11 of-sequence: Children who had received DTP and MV simultaneously (DTP=MV), and children who had  
12 received DTP after MV (DTP>MV). Two groups had not received MV; children who had received DTP,  
13 but had not received MV (DTP, no MV) and children who had not received MV nor DTP (no DTP, no  
14 MV).  
15  
16  
17  
18  
19

### 20 21 *Study population*

22  
23 Children aged 9 to 35 months when visited between April 9, 1991 and April 24, 1996 were eligible for the  
24 study. Figure 1 depicts the combined mortality rate of all study children. Mortality declines with age as  
25 expected in the beginning, but around 21 months of age the mortality rate increases. The primary analysis  
26 is the age group 9-17 months since this is the period after MV is scheduled and before the scheduled age  
27 of booster dose of DTP. Children aged 18 to 35 months at the time of visit were included in a secondary  
28 analysis since they could have received a booster dose of DTP after their in-sequence or out-of-sequence  
29 vaccinations.  
30  
31  
32  
33  
34  
35

### 36 37 *Statistical analyses*

38  
39 Baseline characteristics for different vaccination groups were compared using chi<sup>2</sup>-test, Kruskal-Wallis  
40 rank test and one-way ANOVA comparison. We also compared baseline characteristics of children  
41 included in the analyses with children registered in the HDSS, but not included in the analyses using chi<sup>2</sup>-  
42 test, t-test and Wilcoxon ranksum test. MUAC of children was expressed as a z-score compared with the  
43 2006-WHO growth reference,<sup>30</sup> thus obtaining a standardized measure.  
44  
45  
46  
47

48 Using a Cox-proportional hazards model with age as underlying timescale, we compared mortality rates  
49 of children vaccinated out-of-sequence and children missing MV with the mortality rates of children  
50 vaccinated in-sequence. Children entered the analysis at the date of inspection of the vaccination card and  
51 remained in the analysis in the same vaccination group until the subsequent village visit, 6 months after  
52 the visit, death or migration, whichever came first. A child could therefore contribute with two non-  
53 overlapping periods if the vaccination status was assessed at more than one visit within the relevant age  
54 range (9 to 17 months). The booster doses of DTP and OPV administered at 18 months of age was not  
55  
56  
57  
58  
59  
60

1  
2  
3  
4 registered consistently and we were therefore not able to account for which children had received the  
5 booster doses; we therefore censored at 18 months of age in the main analysis.  
6  
7

8 The data was analysed using the landmark approach,<sup>31</sup> in which the child's vaccination status is only  
9 updated when the vaccination status is re-assessed at the next home visit. If we had used the actual  
10 vaccination dates obtained at subsequent home visits to change the vaccine status, we would have better  
11 vaccination information for children who survived and had kept their vaccination cards, whereas the  
12 families of children who died between visits were likely to have discarded the vaccination card. As a  
13 consequence, the survivors would be given risk-free survival time for their new vaccination status,  
14 whereas it would not be known if the dead child had been vaccinated, and the child would therefore be  
15 misclassified as less vaccinated or unvaccinated. Such "risk-free" survival time will strongly inflate the  
16 estimated benefit of the last vaccination. To avoid such survival bias, we have therefore chosen the  
17 landmark approach.<sup>31</sup>  
18  
19  
20  
21  
22  
23  
24  
25

26 In a secondary analysis, we assessed the effects of out-of-sequence vaccinations among children who  
27 were eligible for the DTP booster dose. In this analysis, we included children aged 18 to 35 months at the  
28 time of visit.  
29  
30

31  
32 Since previous studies have reported sex-differential NSEs, all analyses were stratified by sex and  
33 separate estimates by sex are presented. All analyses were stratified by village cluster, thus comparing  
34 only children from the same community. All available baseline characteristics (Table 1) were included in  
35 the analyses one by one. No variable changed the main estimate by more than 10% and adjusted estimates  
36 are therefore not presented.  
37  
38  
39  
40

41 The original study assessed the effect of MV compared with no MV. To account for sequence of  
42 vaccination, we reanalysed the NSEs of MV comparing children vaccinated in-sequence with MV after  
43 DTP with children with no MV (DTP, no MV and no DTP, no MV).  
44  
45  
46

#### 47 *Sensitivity analyses*

48

49 Since many children were vaccinated during follow up, i.e. after the inspection of their vaccination card,  
50 which allowed their exposure group to be classified, we conducted two sensitivity analyses to limit the  
51 effect of vaccines administered during follow-up. In the first sensitivity analysis, we censored observation  
52 time at 2 months after entry. In the second sensitivity analysis, we included only children who had  
53 completed three DTP vaccinations and were therefore not eligible for further doses during follow-up.  
54  
55  
56  
57  
58

#### 59 *Ethical considerations*

60

1  
2  
3  
4 The data was derived from the HDSS routine data collection, which has been ongoing since 1990 in  
5 collaboration with the Ministry of Health in Guinea-Bissau.<sup>11</sup>  
6  
7

### 8 *Patient and public involvement*

9

10 The communities were involved in locating households, when the HDSS was setup and contributed  
11 information allowing tracing of internal migrants between villages throughout the study period. No  
12 participants were involved in setting the research question or the outcome measure, nor were they  
13 involved in developing plans for recruitment, design, or implementation of the study. No participant was  
14 asked to advise on interpretation or writing up the results. The results are disseminated to the national  
15 public health institute. There are no plans to disseminate the results of the research to study participants or  
16 the community.  
17  
18  
19  
20  
21  
22

## 23 **Results**

### 24 *Baseline characteristics*

25

26 Vaccination status was assessed for 4862 children aged 9-17 months contributing with 5956 observations  
27 (Figure 2). In addition to the 2536 children not included as their vaccination status was not assessed, we  
28 excluded 18 children corresponding to 19 observations from the analyses. These were children with  
29 unknown date of MV or DTP (8 children, 9 observations), and children who had received MV, but no  
30 DTP (10 children, 10 observations). We compared the distribution of baseline characteristics between  
31 children included in and excluded from the study (Supplementary table 1). Children excluded differed  
32 from the children included in the analyses with respect to age, region of residence, ethnicity and maternal  
33 age, but sex, nutritional status and maternal education did not differ. We also compared the distribution of  
34 baseline characteristics for different vaccination groups (Table 1). The age of children differed by  
35 vaccination group: children with DTP>MV were older than children who received DTP before or together  
36 with MV and children without MV were younger ( $p<0.0001$ ). Mean MUAC z-scores for all groups were  
37 around one standard deviation below the reference, but children with DTP>MV and no DTP, no MV  
38 tended to deviate more from the WHO reference curve for MUAC compared with the other groups. The  
39 distribution of vaccination groups differed by region and ethnicity. More mothers of children vaccinated  
40 out-of-sequence or with missing MV had never attended school than mothers of children vaccinated in-  
41 sequence. Children vaccinated out-of-sequence had received their most recent vaccine closer to entry in  
42 the analysis (Table 1).  
43  
44  
45  
46  
47  
48  
49  
50  
51  
52  
53  
54  
55  
56

### 57 *Mortality by vaccination group among children aged 9-17 months*

58  
59  
60

1  
2  
3  
4 Children vaccinated out-of-sequence had higher mortality compared with children vaccinated in-sequence  
5 (MRR: 2.10 (95% CI: 1.07-4.11); DTP=MV: 2.30 (1.15-4.58) and DTP>MV: 1.45 (0.50-4.22)). Children  
6 who had received DTP, but no MV had higher mortality compared with children vaccinated in-sequence  
7 (MRR: 2.57 (1.37-4.83)). Children without DTP and MV had higher mortality than children vaccinated  
8 in-sequence (MRR: 3.04 (1.41-6.55)) (Table 2). The associations were similar for boys and girls ( $p=0.77$ ).  
9 For boys, out-of-sequence vaccinations were associated with a MRR of 1.96 (0.80-4.78); for girls, the  
10 MRR was 2.25 (0.81-6.30). DTP without MV was associated with significantly higher mortality for boys  
11 (MRR: 3.41 (1.50-7.77)); mortality for girls was also higher, but not statistically significant (MRR: 1.67  
12 (0.62-4.50)) (Table 2).

13 We have previously estimated a MRR of 0.48 (0.27-0.87) for MV versus no MV, without taking sequence  
14 of vaccination into consideration<sup>11</sup>. When we examined the NSEs of measles vaccine by comparing  
15 children MV-vaccinated in-sequence with children not MV-vaccinated, we found a MRR of 0.40 (0.23-  
16 0.69) (data not shown).

#### 17 *Mortality by vaccination group among children aged 18 to 35 months*

18 Initially, mortality declined with age as expected (Figure 1). However, in spite of being older, in-sequence  
19 vaccinated children had higher mortality at 18 to 35 months of age (mortality rate (MR): 39.9 per 1000  
20 person years (PYRS)) than children aged 9 to 17 months (MR: 32.6 per 1000 PYRS). Mortality  
21 developed differently with age for children vaccinated in-sequence compared with children vaccinated  
22 out-of-sequence (Figure 3). Since the in-sequence group had high mortality, there was no real differences  
23 in mortality between out-of-sequence and in-sequence vaccinations in the 18-35 months age group  
24 (Supplementary table 2). The MRR for out-of-sequence compared with in-sequence vaccinated children  
25 differed significantly between the age group 9-17 months (Table 2) and 18-35 months (Supplementary  
26 table 2) (test of interactions,  $p=0.02$ ).

#### 27 *Sensitivity analyses*

28 In the age group 9-17 months at least 20% of children vaccinated out-of-sequence received further doses  
29 of DTP during follow-up, but few children vaccinated in-sequence did (Supplementary table 3). To  
30 minimise the effect of vaccinations during follow-up, we conducted two sensitivity analyses. First, we  
31 censored follow-up 2 months after entry since few additional vaccines would be provided in that time  
32 window. This clearly restricted the power, but the trends remained the same: Out-of-sequence  
33 vaccinations were associated with a MRR of 2.51 (0.86-7.35) (Table 3). The estimates changed more for  
34  
35  
36  
37  
38  
39  
40  
41  
42  
43  
44  
45  
46  
47  
48  
49  
50  
51  
52  
53  
54  
55  
56  
57  
58  
59  
60



1  
2  
3  
4 girls; out-of-sequence vaccinations being associated with an 8-fold higher mortality for girls (MRR: 7.83  
5 (0.90-67.83)). Second, we restricted the dataset to children who had received DTP3 and therefore were  
6 unlikely to receive additional routine DTP vaccinations during follow-up (Supplementary table 4). The  
7 MRR of out-of-sequence vaccinations compared with in-sequence vaccinations was 1.85 (0.82-4.16), and  
8 the effect was similar for boys and girls ( $p=0.60$ ) (Supplementary table 4). For girls, both DTP3=MV and  
9 DTP3>MV were associated with higher mortality. For boys, DTP3=MV were associated with higher  
10 mortality, whereas DTP3>MV was not (Supplementary table 4).  
11  
12  
13  
14  
15  
16

## 17 **Discussion**

### 18 *Main findings*

19  
20  
21  
22 Out-of-sequence vaccinations were associated with higher mortality compared with in-sequence  
23 vaccinations. After 18 months, the recommended age of booster DTP vaccination, the general mortality  
24 rate increased and the differential effect of out-of-sequence vaccinations disappeared.  
25  
26

### 27 *Strengths and weaknesses*

28  
29  
30 Using the landmark approach, survival bias was prevented since the vaccination status of the children was  
31 only updated when vaccination status was re-assessed, thereby preventing that vaccination information  
32 was updated for surviving children, but not for dead children. While this approach does not misclassify  
33 observation time dependent on the outcome, the misclassification of vaccinations during follow-up would  
34 yield conservative estimates.<sup>31</sup>  
35  
36  
37  
38

39 Data was collected through the rural HDSS in Guinea-Bissau and vaccination status was based on the  
40 vaccination card being inspected. Vaccinated children, whose vaccination card was not presented, were  
41 not included in the analysis. Mortality as the main outcome is unlikely to be reported wrongly, and with  
42 visits every 6 months, the imprecision in date of death is limited. Booster doses of DTP were not  
43 registered before 1996 and we could not fully explore the effect of booster DTP in the present cohort. To  
44 limit the effect of vaccinations during follow-up, we censored the main analysis at 18 months of age,  
45 when the children were eligible for the DTP booster; furthermore, we conducted two sensitivity analyses  
46 in which we first restricted follow-up to 2 months after entry and second limited the analysis to children  
47 who had received three doses of DTP. The conclusions of the main analysis were robust in these  
48 sensitivity analyses. The statistical model used, only compared children within the same village cluster,  
49 thus limiting bias from local differences such as epidemics, ethnicity, and access to health care.  
50  
51  
52  
53  
54  
55  
56  
57  
58 Comparing children across clusters did not change the conclusions (data not shown).  
59  
60

1  
2  
3  
4 In spite of the careful collection of vaccination information and individual level follow-up, we cannot  
5 guarantee that observed mortality differences are caused only by the sequence of vaccinations. To limit  
6 confounding, we assessed whether available background factors changed the estimate by more than 10%.  
7  
8 As no background factor changed the estimate by more than 10%, we did not present adjusted estimates.  
9  
10 However, there may be residual confounding not adjusted for.  
11  
12

13  
14 To enter the analysis, a child had to survive to have the vaccination card inspected, and a differential  
15 mortality pattern before the inspection of the vaccination card would not be captured in our analyses.  
16  
17 However, in prior studies of vaccination sequence and mortality, the effects have been similar regardless  
18 of whether vaccinations are registered at the time of vaccinations<sup>26 32</sup> or later<sup>24 27</sup>, and this is therefore  
19 unlikely to explain the pattern.  
20  
21

### 22 23 *Comparison with other studies*

24  
25 Similar to our study, previous studies have found that out-of-sequence vaccinations are associated with  
26 increased mortality.<sup>24-26 33-35</sup> In the WHO-commissioned review, out-of-sequence vaccinations with DTP  
27 and MV were associated with a relative mortality risk of 2.34 (1.57-3.50) compared with MV after DTP.<sup>7</sup>  
28  
29 Hence, the age group 9-17 months in the present study is entirely consistent with previous studies. Out-  
30 of-sequence vaccinations may affect not only mortality but also hospital admissions; large population-  
31 based cohort studies from Denmark found that out-of-sequence vaccinations of DTP and MV were  
32 associated with higher hospitalisation rates.<sup>36 37</sup> To our knowledge, no study without survival bias has  
33 found beneficial effects of out-of-sequence vaccinations with DTP and MV.  
34  
35

36  
37 The original study assessed the effect of MV compared with no MV and found a MRR of 0.48 (0.27-  
38 0.87)<sup>11</sup> not accounting for sequence of vaccination. According to our analyses this has underestimated the  
39 NSEs of MV. When we considered sequence of vaccination and compared children MV-vaccinated in-  
40 sequence with children not MV-vaccinated, we found a MRR of 0.40 (0.23-0.69).  
41  
42

43  
44 The mortality rate usually declines with age.<sup>38</sup> In our study, among children vaccinated in-sequence, we  
45 found higher mortality rate in children aged 18 to 35 months compared with children aged 9 to 17 months  
46 (Figure 3). Since mortality did decline with age in the younger age group, we speculate that DTP booster  
47 for which children were eligible at 18 months of age may have contributed to this pattern just like DTP  
48 out-of-sequence with MV was associated with higher mortality. Unfortunately, our data collection tool in  
49 the early 1990 did not systematically assess DTP booster coverage. According to UNICEF figures, the  
50 DTP3 coverage was low in 1991-1996 (45-74%),<sup>39</sup> and we would not expect the coverage of booster DTP  
51  
52  
53  
54  
55  
56  
57  
58  
59  
60

1  
2  
3  
4 to be high. In urban Bissau, where the coverage for booster DTP was high, we have previously shown a  
5 similar increase in mortality after 18 months of age.<sup>5</sup> Thus, DTP booster doses may partly explain the  
6 higher mortality among 18-35 months old children, as observed in Gambia and India.<sup>5 35 40</sup>  
7  
8

9  
10 Effects were similar for boys and girls, and overall we found no sex-differential effect of out-of-sequence  
11 vaccinations. However, other studies have found higher female mortality when DTP was administered  
12 after MV<sup>21 40</sup>; for example, high-titre measles vaccine (HTMV) was associated with higher female  
13 mortality and had to be withdrawn because most HTMV recipients had received DTP after MV.<sup>28</sup> In the  
14 present cohort, few children had received DTP after MV and most out-of-sequence vaccinations were  
15 combined administration of DTP and MV. When follow-up was limited to 2 months, estimates for out-of-  
16 sequence changed more for girls than for boys even though the difference between boys and girls did not  
17 reach statistical significance.  
18  
19  
20  
21  
22  
23

#### 24 *Interpretation and implications*

25  
26  
27 We found that out-of-sequence vaccinations were associated with higher mortality both for children with  
28 co-administration of DTP and MV, and children with DTP after MV, compared with children vaccinated  
29 in-sequence. It could be speculated that out-of-sequence vaccinated children just had higher mortality  
30 because they were frail or their mothers less compliant with health services. In the present study, it speaks  
31 against the effect being due to an inherent bias that the difference disappeared completely for 18-35  
32 months old children, possibly due to booster DTP. Furthermore, evidence from RCTs of medium and  
33 high-titre MV strongly supported that an inactivated vaccine after MV was associated with higher  
34 mortality.<sup>28</sup> Thus, sequence of vaccinations is likely to be important for child survival and should be  
35 considered when planning, implementing and evaluating the childhood vaccination programmes.  
36  
37  
38  
39  
40  
41  
42

43 Current vaccination recommendations are based merely on the disease-specific effects of vaccines, often  
44 based on surrogate measures of the ability to prevent targeted infections. However, if vaccines alter the  
45 susceptibility to other infections this should be considered. Currently, vaccination programmes are  
46 evaluated based on vaccination coverage of DTP and MV at 12 months of age, and timeliness or sequence  
47 of vaccination is not taken into account. We found that DTP not succeeded by MV was associated with  
48 increased mortality and that out-of-sequence vaccinations were associated with higher mortality  
49 compared with children vaccinated in-sequence, thus, the current evaluation criteria emphasising DTP3  
50 coverage may not optimise the impact of the vaccination programme on child health. Our results indicate  
51 that a stronger emphasis should be put on increasing the MV coverage and getting DTPs and MV in the  
52 recommended sequence.  
53  
54  
55  
56  
57  
58  
59  
60

1  
2  
3  
4 Currently WHO is planning to introduce the second year of life platform with several inactivated vaccines  
5 (booster DTP, Meningitis A, RTS,S Malaria vaccine).<sup>29</sup> Hence, in the future children may receive  
6 inactivated vaccines after live MV at 9 months of age, not only because they deviate from the  
7 recommended schedule, but also if they follow the schedule. We urge others to test the effect of providing  
8 non-live vaccines after MV, preferably prior to the introduction of new vaccines, while RCTs are still  
9 possible.  
10  
11  
12  
13

## 14 **Conclusion**

15  
16  
17 Overall, we found that out-of-sequence vaccinations in children were associated with higher mortality  
18 compared with children vaccinated in-sequence. Vaccination programmes should monitor the sequence of  
19 vaccinations to optimise the overall effect on child survival.  
20  
21  
22  
23  
24  
25

## 26 **Funding**

27  
28 This work was supported by European Union FP7 support for OPTIMUNISE [Health-F3-2011-261375],  
29 and by DANIDA travel grant [grant no. A27607]. The Bandim Health Project received support from the  
30 Danish National Research Foundation via Research Center for Vitamins and Vaccines [DNRF108]. The  
31 sponsors had no role in designing the study, the data collection, data analysis, data interpretation or  
32 writing the paper.  
33  
34  
35  
36

## 37 **Acknowledgments**

38  
39 We wish to thank all children and mothers contributing with information to the present study.  
40 Furthermore, we would like to thank the dedicated staff working at BHP in Guinea-Bissau for the great  
41 job they have done regarding data collection, data entry and data cleaning for the present study.  
42  
43  
44  
45

## 46 **Authors' contributions**

47  
48 SMT, PA and ABF designed the study and planned the analyses. SMT extracted, cleaned and analysed  
49 the data. PA supervised the data collection and data entry. SMT drafted the paper with assistance from  
50 PA, AR and ABF. All authors read and approved the final manuscript.  
51  
52  
53

## 54 **Copyright**

55  
56 The Corresponding Author has the right to grant on behalf of all authors and does grant on behalf of all  
57 authors, a worldwide license to the Publishers and its licensees in perpetuity, in all forms, formats and  
58  
59  
60

1  
2  
3  
4 media (whether known now or created in the future), to i) publish, reproduce, distribute, display and store  
5 the Contribution, ii) translate the Contribution into other languages, create adaptations, reprints, include  
6 within collections and create summaries, extracts and/or, abstracts of the Contribution, iii) create any  
7 other derivative work(s) based on the Contribution, iv) to exploit all subsidiary rights in the Contribution,  
8 v) the inclusion of electronic links from the Contribution to third party material where-ever it may be  
9 located; and, vi) license any third party to do any or all of the above.  
10  
11  
12  
13  
14

### 15 **Competing interests**

16  
17 All authors have completed the ICMJE uniform disclosure form at [www.icmje.org/coi\\_disclosure.pdf](http://www.icmje.org/coi_disclosure.pdf) and  
18 declare: no support from any organisation for the submitted work; no financial relationships with any  
19 organisations that might have an interest in the submitted work in the previous three years; no other  
20 relationships or activities that could appear to have influenced the submitted work.  
21  
22  
23  
24

### 25 **Data sharing**

26  
27 Data used for analyses in the present study are available from the corresponding author on reasonable  
28 request.  
29  
30  
31

### 32 **Transparency statement**

33  
34 SMT affirms that the manuscript is an honest, accurate, and transparent account of the study being  
35 reported; that no important aspects of the study have been omitted; and that any discrepancies from the  
36 study as originally planned have been explained.  
37  
38  
39  
40  
41  
42  
43  
44  
45  
46  
47  
48  
49  
50  
51  
52  
53  
54  
55  
56  
57  
58  
59  
60

## References

1. Liu L, Oza S, Hogan D, et al. Global, regional, and national causes of under-5 mortality in 2000-15: an updated systematic analysis with implications for the Sustainable Development Goals. *Lancet* 2016;388(10063):3027-35. doi: 10.1016/S0140-6736(16)31593-8
2. Feikin DR, Flannery B, Hamel MJ, et al. Vaccines for children in Low- and Middle-Income Countries. In: Black RE, Laxminarayan R, Temmerman M, et al., eds. Reproductive, Maternal, Newborn, and Child Health: Disease Control Priorities: World Bank 2016.
3. Plotkin S. History of vaccination. *Proceedings of the National Academy of Sciences of the United States of America* 2014;111(34):12283-7. doi: 10.1073/pnas.1400472111 [published Online First: 2014/08/20]
4. Benn CS, Netea MG, Selin LK, et al. A small jab - a big effect: nonspecific immunomodulation by vaccines. *Trends in immunology* 2013;34(9):431-9. doi: 10.1016/j.it.2013.04.004
5. Aaby P, Kollmann TR, Benn CS. Nonspecific effects of neonatal and infant vaccination: public-health, immunological and conceptual challenges. *Nature immunology* 2014;15(10):895-9. doi: 10.1038/ni.2961
6. Aaby P, Benn CS. Non-specific and sex-differential effects of routine vaccines: what evidence is needed to take these effects into consideration in low-income countries? *Human vaccines* 2011;7(1):120-4. [published Online First: 2011/02/01]
7. Higgins JP, Soares-Weiser K, Lopez-Lopez JA, et al. Association of BCG, DTP, and measles containing vaccines with childhood mortality: systematic review. *BMJ* 2016;355:i5170. doi: 10.1136/bmj.i5170
8. Aaby P, Samb B, Simondon F, et al. Non-specific beneficial effect of measles immunisation: analysis of mortality studies from developing countries. *BMJ* 1995;311(7003):481-5. [published Online First: 1995/08/19]
9. Desgrees du Lou A, Pison G, Aaby P. Role of immunizations in the recent decline in childhood mortality and the changes in the female/male mortality ratio in rural Senegal. *Am J Epidemiol* 1995;142(6):643-52.
10. Aaby P, Bhuiya A, Nahar L, et al. The survival benefit of measles immunization may not be explained entirely by the prevention of measles disease: a community study from rural Bangladesh. *Int J Epidemiol* 2003;32(1):106-16.
11. Kristensen I, Aaby P, Jensen H. Routine vaccinations and child survival: follow up study in Guinea-Bissau, West Africa. *BMJ* 2000;321(7274):1435-8. [published Online First: 2000/12/09]
12. Fisker AB, Hornshoj L, Rodrigues A, et al. Effects of the introduction of new vaccines in Guinea-Bissau on vaccine coverage, vaccine timeliness, and child survival: an observational study. *The lancet global health* 2014;2(8):e478-87. doi: 10.1016/S2214-109X(14)70274-8 [published Online First: 24-07-2014]
13. Aaby P, Martins CL, Garly ML, et al. Non-specific effects of standard measles vaccine at 4.5 and 9 months of age on childhood mortality: randomised controlled trial. *BMJ* 2010;341:c6495. doi: 10.1136/bmj.c6495 [published Online First: 2010/12/02]
14. World Health Organization. Summary of the SAGE April 2014 meeting 2014 [Available from: [http://www.who.int/immunization/sage/meetings/2014/april/report\\_summary\\_april\\_2014/en/](http://www.who.int/immunization/sage/meetings/2014/april/report_summary_april_2014/en/) accessed 10-04-2014 2014.
15. Aaby P, Jensen H, Gomes J, et al. The introduction of diphtheria-tetanus-pertussis vaccine and child mortality in rural Guinea-Bissau: an observational study. *Int J Epidemiol* 2004;33(2):374-80. doi: 10.1093/ije/dyh005 [published Online First: 2004/04/15]
16. Mogensen SW, Andersen A, Rodrigues A, et al. The Introduction of Diphtheria-Tetanus-Pertussis and Oral Polio Vaccine Among Young Infants in an Urban African Community: A Natural Experiment. *EBioMedicine* 2017;17:192-98. doi: 10.1016/j.ebiom.2017.01.041
17. Aaby P, Mogensen SW, Rodrigues A, et al. Evidence of Increase in Mortality After the Introduction of Diphtheria-Tetanus-Pertussis Vaccine to Children Aged 6-35 Months in Guinea-Bissau: A Time for Reflection? *Front Public Health* 2018;6:79. doi: 10.3389/fpubh.2018.00079 [published Online First: 2018/04/05]

18. Welaga P, Nielsen J, Adjuik M, et al. Non-specific effects of diphtheria-tetanus-pertussis and measles vaccinations? An analysis of surveillance data from Navrongo, Ghana. *Trop Med Int Health* 2012;17(12):1492-505. doi: 10.1111/j.1365-3156.2012.03093.x
19. Agergaard J, Nante E, Poulstrup G, et al. Diphtheria-tetanus-pertussis vaccine administered simultaneously with measles vaccine is associated with increased morbidity and poor growth in girls. A randomised trial from Guinea-Bissau. *Vaccine* 2011;29(3):487-500.
20. Aaby P, Benn C, Nielsen J, et al. Testing the hypothesis that diphtheria-tetanus-pertussis vaccine has negative non-specific and sex-differential effects on child survival in high-mortality countries. *BMJ open* 2012;2(3):e000707. doi: 10.1136/bmjopen-2011-000707 [published Online First: 2012/05/24]
21. Aaby P, Garly ML, Nielsen J, et al. Increased female-male mortality ratio associated with inactivated polio and diphtheria-tetanus-pertussis vaccines: Observations from vaccination trials in Guinea-Bissau. *Pediatr Infect Dis J* 2007;26(3):247-52. doi: 10.1097/01.inf.0000256735.05098.01 [published Online First: 2007/05/09]
22. Aaby P, Ravn H, Benn CS. The WHO Review of the Possible Non-Specific Effects of Diphtheria-Tetanus-Pertussis Vaccine. *Pediatr Infect Dis J* 2016;35(11):1247-57. doi: 10.1097/INF.0000000000001269
23. Benn CS, Aaby P. Diphtheria-tetanus-pertussis vaccination administered after measles vaccine: increased female mortality? *Pediatr Infect Dis J* 2012;31(10):1095-7. doi: 10.1097/INF.0b013e318263135e [published Online First: 2012/06/12]
24. Aaby P, Biai S, Veirum JE, et al. DTP with or after measles vaccination is associated with increased in-hospital mortality in Guinea-Bissau. *Vaccine* 2007;25(7):1265-9. doi: 10.1016/j.vaccine.2006.10.007
25. Aaby P, Jensen H, Samb B, et al. Differences in female-male mortality after high-titre measles vaccine and association with subsequent vaccination with diphtheria-tetanus-pertussis and inactivated poliovirus: reanalysis of West African studies. *Lancet* 2003;361(9376):2183-8. doi: 10.1016/S0140-6736(03)13771-3
26. Fisker AB, Ravn H, Rodrigues A, et al. Co-administration of live measles and yellow fever vaccines and inactivated pentavalent vaccines is associated with increased mortality compared with measles and yellow fever vaccines only. An observational study from Guinea-Bissau. *Vaccine* 2014;32(5):598-605. doi: 10.1016/j.vaccine.2013.11.074
27. Welaga P, Oduro A, Debpuur C, et al. Fewer out-of-sequence vaccinations and reduction of child mortality in Northern Ghana. *Vaccine* 2017;35(18):2496-503. doi: 10.1016/j.vaccine.2017.03.004
28. Aaby P, Ravn H, Benn CS, et al. Randomized Trials Comparing Inactivated Vaccine After Medium- or High-titer Measles Vaccine With Standard Titer Measles Vaccine After Inactivated Vaccine: A Meta-analysis. *Pediatr Infect Dis J* 2016;35(11):1232-41. doi: 10.1097/INF.0000000000001300
29. Meeting of the Strategic Advisory Group of Experts on immunization, April 2016 - conclusions and recommendations. *Wkly Epidemiol Rec* 2016;91(21):266-84. [published Online First: 2016/05/31]
30. World Health Organization. Multicentre Growth Reference Study Group. WHO Child Growth Standards: Length/height-for-age, weight-for-age, weight-for-length, weight-for-height and body mass index-for-age: Methods and development. Geneva: World Health Organisation, 2006.
31. Jensen H, Benn CS, Lisse IM, et al. Survival bias in observational studies of the impact of routine immunizations on childhood survival. *Trop Med Int Health* 2007;12(1):5-14. doi: 10.1111/j.1365-3156.2006.01773.x [published Online First: 2007/01/09]
32. Fisker AB, Thysen SM. Non-live pentavalent vaccines after live measles vaccine may increase mortality. *Vaccine* 2018;36(41):6039-42. doi: 10.1016/j.vaccine.2018.08.083. [published Online First: 2018/09/10]
33. Aaby P, Ibrahim SA, Libman MD, et al. The sequence of vaccinations and increased female mortality after high-titre measles vaccine: trials from rural Sudan and Kinshasa. *Vaccine* 2006;24(15):2764-71. doi: 10.1016/j.vaccine.2006.01.004 [published Online First: 2006/02/07]
34. Aaby P, Jensen H, Walraven G. Age-specific changes in the female-male mortality ratio related to the pattern of vaccinations: an observational study from rural Gambia. *Vaccine* 2006;24(22):4701-8. doi: 10.1016/j.vaccine.2006.03.038 [published Online First: 2006/04/20]
35. Hirve S, Bavdekar A, Juvekar S, et al. Non-specific and sex-differential effects of vaccinations on child survival in rural western India. *Vaccine* 2012;30(50):7300-8. doi: 10.1016/j.vaccine.2012.09.035

- 1  
2  
3  
4 36. Sorup S, Benn CS, Poulsen A, et al. Live vaccine against measles, mumps, and rubella and the risk of hospital  
5 admissions for nontargeted infections. *JAMA* 2014;311(8):826-35. doi: 10.1001/jama.2014.470  
6  
7 37. Sorup S, Benn CS, Poulsen A, et al. Simultaneous vaccination with MMR and DTaP-IPV-Hib and rate of hospital  
8 admissions with any infections: A nationwide register based cohort study. *Vaccine* 2016;34(50):6172-80.  
9 doi: doi: 10.1016/j.vaccine.2016.11.005 [published Online First: 2016/11/15]  
10 38. Liu L, Hill K, Oza S, et al. Levels and Causes of Mortality under Age Five Years. In: Black RE, Laxminarayan R,  
11 Temmerman M, et al., eds. Reproductive, Maternal, Newborn, and Child Health: Disease Control  
12 Priorities: World Bank, 2016.  
13 39. UNICEF. 2016 [updated Aug 2016. Available from: <http://data.unicef.org/topic/child-health/immunization/>  
14 accessed September 29 2016.  
15 40. Krishnan A, Srivastava R, Dwivedi P, et al. Non-specific sex-differential effect of DTP vaccination may partially  
16 explain the excess girl child mortality in Ballabgarh, India. *Trop Med Int Health* 2013;18(11):1329-37. doi:  
17 10.1111/tmi.12192  
18  
19  
20  
21  
22  
23  
24  
25  
26  
27  
28  
29  
30  
31  
32  
33  
34  
35  
36  
37  
38  
39  
40  
41  
42  
43  
44  
45  
46  
47  
48  
49  
50  
51  
52  
53  
54  
55  
56  
57  
58  
59  
60



**Figure 1** Overall mortality rate among children visited between 9 and 35 months of age.

Note: The figure plots the unadjusted mortality rates for children with a vaccination card seen between 9-35 months of age. The smoothed mortality curve starts shortly before 12 months of age, where the first event occurs. Only few children contribute with observation time between 9 and 12 months.

For peer review only

**Figure 2 Flowchart of children included and excluded from the analysis**

1  
2  
3  
4  
5  
6  
7  
8  
9  
10  
11  
12  
13  
14  
15  
16  
17  
18  
19  
20  
21  
22  
23  
24  
25  
26  
27  
28  
29  
30  
31  
32  
33  
34  
35  
36  
37  
38  
39  
40  
41  
42  
43  
44  
45  
46

For peer review only

**Figure 3** Mortality rate according to sequence of DTP and MV vaccinations among children visited between 9 and 35 months of age.

Note: The figure plots unadjusted mortality rates by vaccination status (in-sequence vs out-of-sequence vaccinations) among children with a vaccination card seen between 9-35 months of age. The smoothed mortality curve starts shortly before 12 months of age, where the first event occurs. Only few children contribute with observation time between 9 and 12 months.

For peer review only

**Table 1 - Baseline characteristics for observations of children (9-17 months old) included in the analyses by vaccination group**

|                                                                         | <b>DTP&lt;MV</b>   | <b>DTP=MV</b>      | <b>DTP&gt;MV</b>   | <b>DTP, no MV</b>  | <b>No DTP, no MV</b> | <b>p-value</b> |
|-------------------------------------------------------------------------|--------------------|--------------------|--------------------|--------------------|----------------------|----------------|
| Numbers (%)                                                             | 1590 (27)          | 1491 (25)          | 493 (8)            | 1816 (31)          | 547 (9)              |                |
| <b>Sex</b>                                                              |                    |                    |                    |                    |                      | .29            |
| Male (%)                                                                | 834 (52)           | 729 (49)           | 255 (52)           | 931 (51)           | 290 (53)             |                |
| Female (%)                                                              | 756 (48)           | 762 (51)           | 238 (48)           | 885 (49)           | 257 (47)             |                |
| <b>Median age in months at start of follow-up (interquartile range)</b> | 14.0 (11.8 – 15.9) | 13.8 (11.9 – 16.0) | 15.3 (13.6 – 16.8) | 11.4 (10.0 - 13.5) | 12.0 (10.4 – 14.7)   | <0.0001        |
| <b>MUAC z-score at start of Follow-up</b>                               | -0.93 (1.09)       | -1.09 (1.05)       | -1.16 (1.08)       | -1.09 (1.13)       | -1.13 (1.13)         | <0.0001        |
| <b>Region</b>                                                           |                    |                    |                    |                    |                      | <0.0001        |
| Oio                                                                     | 303 (19)           | 337 (23)           | 87 (18)            | 413 (23)           | 167 (31)             |                |
| Biombo                                                                  | 405 (25)           | 283 (19)           | 108 (22)           | 386 (21)           | 147 (27)             |                |
| Gabu                                                                    | 158 (10)           | 484 (32)           | 184 (37)           | 437 (24)           | 87 (16)              |                |
| Cacheu                                                                  | 353 (22)           | 125 (8)            | 37 (8)             | 226 (12)           | 46 (8)               |                |
| Bafata                                                                  | 371 (23)           | 262 (18)           | 77 (16)            | 354 (19)           | 100 (18)             |                |
| <b>Ethnicity</b>                                                        |                    |                    |                    |                    |                      | <0.0001        |
| Balanta                                                                 | 220 (14)           | 179 (12)           | 38 (8)             | 323 (18)           | 177 (33)             |                |
| Pepel                                                                   | 338 (21)           | 228 (16)           | 98 (20)            | 316 (18)           | 137 (25)             |                |
| Fula/Mandinca                                                           | 703 (45)           | 921 (63)           | 296 (61)           | 950 (53)           | 183 (34)             |                |
| Manjaco                                                                 | 106 (7)            | 44 (3)             | 9 (2)              | 81 (4)             | 25 (5)               |                |
| Other                                                                   | 208 (13)           | 96 (7)             | 45 (9)             | 134 (7)            | 18 (3)               |                |
| <b>Median maternal age in years (interquartile range)</b>               | 25.6 (20.6 - 30.8) | 26 (21.2 - 30.6)   | 25.9 (21.3 - 31)   | 26.2 (20.8 - 30.9) | 26.8 (21.3 - 31.5)   | .05            |
| <b>Education of caretaker</b>                                           |                    |                    |                    |                    |                      | <0.0001        |
| 0 years                                                                 | 1290 (81)          | 1302 (87)          | 426 (86)           | 1562 (86)          | 485 (89)             |                |
| 1-4 years                                                               | 198 (12)           | 143 (10)           | 52 (11)            | 179 (10)           | 44 (8)               |                |
| >4 years                                                                | 77 (5)             | 15 (1)             | 6 (1)              | 45 (2)             | 3 (1)                |                |
| <b>Time since MV/ Time since DTP after MV in days</b>                   | 105 (52 - 169)     | 85 (38 - 154)      | 66 (30 - 108)      | 161 (98 - 238)     | N/A                  | <0.0001        |

<sup>1</sup> 503 observations with missing MUAC

<sup>2</sup> 64 observations with missing information on ethnicity

<sup>3</sup> 63 observations with missing information on maternal age

<sup>4</sup> 110 observations with missing information on education of caretaker

1  
2  
3  
4  
5  
6  
7  
8  
9  
10  
11  
12  
13  
14  
15  
16  
17  
18  
19  
20  
21  
22  
23  
24  
25  
26  
27  
28  
29  
30  
31  
32  
33  
34  
35  
36  
37  
38  
39  
40  
41  
42  
43  
44  
45  
46

For peer review only

**Table 2 - Main analysis: Mortality of children visited between 9 and 17 months of age according to vaccination group**

| Vaccination status                          | Observations<br>N | MR per 1000<br>PYRS<br>(deaths/PYRS) | MRR<br>(95% CI)         | Boys              |                                      |                         | Girls             |                                      |                          |
|---------------------------------------------|-------------------|--------------------------------------|-------------------------|-------------------|--------------------------------------|-------------------------|-------------------|--------------------------------------|--------------------------|
|                                             |                   |                                      |                         | Observations<br>N | MR per 1000<br>PYRS<br>(deaths/PYRS) | MRR<br>(95% CI)         | Observations<br>N | MR per 1000<br>PYRS<br>(deaths/PYRS) | MRR<br>(95% CI)          |
| DTP < MV                                    | 1590              | 32.6 (16/491)                        | Ref                     | 834               | 34.8 (9/258)                         | Ref                     | 756               | 30.1 (7/232)                         | Ref                      |
| DTP = MV                                    | 1491              | 63.7 (29/455)                        | <b>2.30 (1.15-4.58)</b> | 729               | 63.6 (14/220)                        | 2.08 (0.83-5.26)        | 762               | 63.8 (15/235)                        | 2.50 (0.88-7.12)         |
| DTP > MV                                    | 493               | 43.1 (5/116)                         | 1.45 (0.50-4.22)        | 255               | 51.5 (3/58)                          | 1.48 (0.37-5.88)        | 238               | 34.6 (2/58)                          | 1.38 (0.25-7.52)         |
| DTP, no MV                                  | 1816              | 78.8 (57/723)                        | <b>2.57 (1.37-4.83)</b> | 931               | 102.3 (38/372)                       | <b>3.41 (1.50-7.77)</b> | 885               | 54.1 (19/351)                        | 1.67 (0.62-4.50)         |
| No DTP, no MV                               | 547               | 111.3 (22/198)                       | <b>3.04 (1.41-6.55)</b> | 290               | 95.3 (10/105)                        | 2.77 (0.97-7.97)        | 257               | 129.5 (12/93)                        | <b>3.28 (1.06-10.12)</b> |
| Out-of-sequence<br>vaccinations<br>combined |                   |                                      |                         |                   |                                      |                         |                   |                                      |                          |
| DTP>=MV                                     | 1984              | 59.5 (34/571)                        | <b>2.10 (1.07-4.11)</b> | 984               | 61.1 (17/278)                        | 1.96 (0.80-4.78)        | 1000              | 58.0 (17/293)                        | 2.25 (0.81-6.30)         |

Note: Mortality rate ratios were calculated using Cox proportional hazards models with age as underlying time, stratified by sex and village cluster.

**Table 3 - Mortality of children visited between 9 and 18 months of age according to vaccination group with follow up censored at 2 months after entry into the analysis**

| Vaccination status                          | Observations<br>N | MR per 1000<br>PYRS<br>(deaths/PYRS) | MRR<br>(95% CI)         | Boys              |                                      |                   | Girls             |                                      |                            |
|---------------------------------------------|-------------------|--------------------------------------|-------------------------|-------------------|--------------------------------------|-------------------|-------------------|--------------------------------------|----------------------------|
|                                             |                   |                                      |                         | Observations<br>N | MR per 1000<br>PYRS<br>(deaths/PYRS) | MRR<br>(95% CI)   | Observations<br>N | MR per 1000<br>PYRS<br>(deaths/PYRS) | MRR<br>(95% CI)            |
| DTP < MV                                    | 1590              | 25.8 (6/233)                         | Ref                     | 834               | 32.9 (4/122)                         | Ref               | 756               | 18.0 (2/111)                         | Ref                        |
| DTP = MV                                    | 1491              | 60.5 (13/215)                        | 2.34 (0.77-7.12)        | 729               | 38.2 (4/105)                         | 1.16 (0.27-5.07)  | 762               | 81.8 (9/110)                         | 6.71 (0.77-58.26)          |
| DTP > MV                                    | 493               | 60.4 (4/66)                          | 3.30 (0.77-14.14)       | 255               | 58.8 (2/34)                          | 1.61 (0.26-10.18) | 238               | 62.1 (2/32)                          | <b>14.61 (1.01-210.68)</b> |
| DTP, no MV                                  | 1816              | 93.4 (27/289)                        | <b>3.47 (1.24-9.69)</b> | 931               | 127.8 (19/149)                       | 2.56 (0.80-8.24)  | 885               | 57.0 (8/140)                         | 6.34 (0.72-55.92)          |
| No DTP, no MV                               | 547               | 130.3 (11/84)                        | 3.35 (1.00-11.26)       | 290               | 88.6 (4/45)                          | 1.19 (0.24-5.90)  | 257               | 178.3 (7/39)                         | <b>14.73 (1.55-140.27)</b> |
| Out-of-sequence<br>vaccinations<br>combined |                   |                                      |                         |                   |                                      |                   |                   |                                      |                            |
| DTP>=MV                                     | 1984              | 60.5 (17/281)                        | 2.51 (0.86-7.35)        | 984               | 43.2 (6/139)                         | 1.26 (0.32-4.85)  | 1000              | 77.4 (11/142)                        | 7.83 (0.90-67.83)          |

Note: Mortality rate ratios were calculated using Cox proportional hazards models with age as underlying time, stratified by sex and village cluster.

1  
2  
3  
4  
5  
6  
7  
8  
9  
10  
11  
12  
13  
14  
15  
16  
17  
18  
19  
20  
21  
22  
23  
24  
25  
26  
27  
28  
29  
30  
31  
32  
33  
34  
35  
36  
37  
38  
39  
40  
41  
42  
43  
44  
45  
46  
47  
48  
49  
50  
51  
52  
53  
54  
55  
56  
57  
58  
59  
60



Overall mortality rate among children visited between 9 and 35 months of age.





Flowchart of children included and excluded from the analysis

127x93mm (300 x 300 DPI)

1  
2  
3  
4  
5  
6  
7  
8  
9  
10  
11  
12  
13  
14  
15  
16  
17  
18  
19  
20  
21  
22  
23  
24  
25  
26  
27  
28  
29  
30  
31  
32  
33  
34  
35  
36  
37  
38  
39  
40  
41  
42  
43  
44  
45  
46  
47  
48  
49  
50  
51  
52  
53  
54  
55  
56  
57  
58  
59  
60

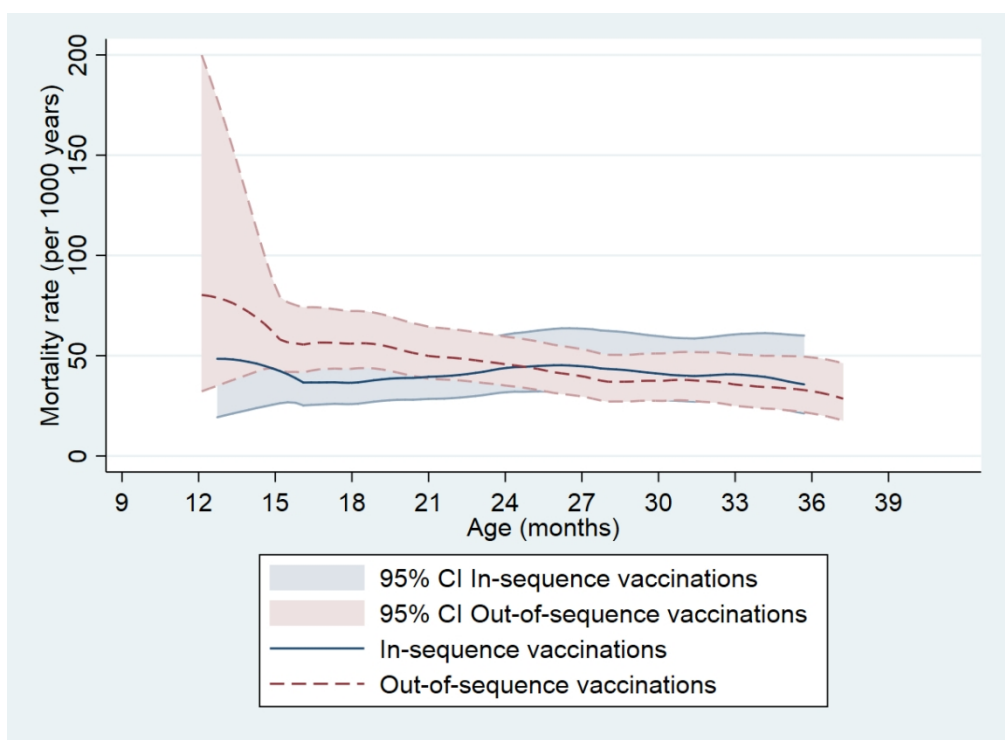

Mortality rate according to sequence of DTP and MV vaccinations among children visited between 9 and 35 months of age.

428x312mm (72 x 72 DPI)

**Supplementary table 1 - Baseline characteristics among children included and excluded from the analyses**

|                                                                         | Included           | Excluded           | p-value |
|-------------------------------------------------------------------------|--------------------|--------------------|---------|
| Numbers (%)                                                             | 5937 (57)          | 4519 (43)          |         |
| <b>Sex</b>                                                              |                    |                    | .11     |
| Male (%)                                                                | 3039 (51)          | 2242 (50)          |         |
| Female (%)                                                              | 2898 (49)          | 2277 (50)          |         |
| <b>Median age in months at start of follow-up (interquartile range)</b> | 13.1 (11.0 – 15.5) | 13.4 (11.1 – 15.7) | 0.0005  |
| <b>MUAC at start of Follow-up<sup>1</sup></b>                           | -1.06 (1.1)        | -1.09 (1.12)       | .42     |
| <b>Region</b>                                                           |                    |                    | <0.0001 |
| Oio                                                                     | 1307 (22)          | 969 (21)           |         |
| Biombo                                                                  | 1329 (22)          | 1380 (31)          |         |
| Gabu                                                                    | 1350 (23)          | 803 (18)           |         |
| Cacheu                                                                  | 787 (13)           | 692 (15)           |         |
| Bafata                                                                  | 1164 (20)          | 675 (15)           |         |
| <b>Ethnicity<sup>2</sup></b>                                            |                    |                    | <0.0001 |
| Balanta                                                                 | 937 (16)           | 926 (21)           |         |
| Pepel                                                                   | 1117 (19)          | 1172 (26)          |         |
| Fula/Mandinca                                                           | 3053 (52)          | 1728 (39)          |         |
| Manjaco                                                                 | 265 (5)            | 270 (6)            |         |
| Other                                                                   | 501 (9)            | 369 (8)            |         |
| <b>Median maternal age in years (interquartile range)<sup>3</sup></b>   | 26 (20.9 - 30.8)   | 25.3 (20.4 - 30)   | <0.0001 |
| <b>Education of caretaker<sup>4</sup></b>                               |                    |                    | 0.95    |
| 0 years                                                                 | 5065 (85)          | 3805 (84)          |         |
| 1-4 years                                                               | 616 (10)           | 472 (10)           |         |
| >4 years                                                                | 146 (2)            | 111 (2)            |         |

<sup>1</sup> 3731 observations with missing MUAC

<sup>2</sup> 118 observations with missing information on ethnicity

<sup>3</sup> 116 observations with missing information on maternal age

<sup>4</sup> 241 observations with missing information on education of caretaker

Supplementary table 2 - Mortality of children visited between 18 and 35 months of age according to vaccination group

| Vaccination status                          | Observations<br>N | MR per 1000<br>PYRS<br>(deaths/PYRS) | MRR<br>(95% CI)         | Boys              |                                      |                  | Girls             |                                      |                         |
|---------------------------------------------|-------------------|--------------------------------------|-------------------------|-------------------|--------------------------------------|------------------|-------------------|--------------------------------------|-------------------------|
|                                             |                   |                                      |                         | Observations<br>N | MR per 1000<br>PYRS<br>(deaths/PYRS) | MRR<br>(95% CI)  | Observations<br>N | MR per 1000<br>PYRS<br>(deaths/PYRS) | MRR<br>(95% CI)         |
| DTP < MV                                    | 2415              | 39.9 (46/1154)                       | Ref                     | 1249              | 45.2 (27/598)                        | Ref              | 1166              | 34.1 (19/557)                        | Ref                     |
| DTP = MV                                    | 2065              | 47.0 (46/978)                        | 0.98 (0.62-1.54)        | 1031              | 57.5 (28/487)                        | 1.06 (0.59-1.92) | 1034              | 36.7 (18/491)                        | 0.85 (0.42-1.71)        |
| DTP > MV                                    | 1940              | 31.3 (29/927)                        | 0.62 (0.36-1.06)        | 954               | 41.4 (19/458)                        | 0.83 (0.42-1.63) | 986               | 21.3 (10/469)                        | <b>0.39 (0.16-0.94)</b> |
| DTP, no MV                                  | 580               | 65.9 (18/273)                        | 1.40 (0.77-2.55)        | 278               | 76.2 (10/131)                        | 1.39 (0.63-3.05) | 302               | 56.3 (8/142)                         | 1.37 (0.55-3.42)        |
| No DTP, no MV                               | 502               | 112.0 (26/232)                       | <b>2.18 (1.21-3.90)</b> | 238               | 71.0 (8/113)                         | 1.58 (0.64-3.91) | 264               | 150.8 (18/119)                       | <b>2.68 (1.21-5.94)</b> |
| Out-of-sequence<br>vaccinations<br>combined |                   |                                      |                         |                   |                                      |                  |                   |                                      |                         |
| DTP>=MV                                     | 4005              | 39.4 (75/1,905)                      | 0.82 (0.54-1.24)        | 1985              | 49.7 (47/946)                        | 0.96 (0.56-1.67) | 2020              | 29.2 (28/960)                        | 0.64 (0.33-1.24)        |

Note: Mortality rate ratios were calculated using Cox proportional hazards models with age as underlying time, stratified by sex and village cluster.

Review only

**Supplementary table 3 - Registered vaccinations during follow-up (FU) period among those with vaccination status assessed again**

|                                                   | Observations<br>N | Seen card<br>after visit | Vaccinated during FU |           |           |          |
|---------------------------------------------------|-------------------|--------------------------|----------------------|-----------|-----------|----------|
|                                                   |                   |                          | DTP                  | MV        | Polio     | BCG      |
| <b>9-17 months of age<br/>Vaccination status</b>  |                   |                          |                      |           |           |          |
| DTP < MV                                          | 1590              | 1427                     | 31 (2%)              | 0 (0%)    | 51 (4%)   | 3 (0%)   |
| DTP = MV                                          | 1491              | 1324                     | 310 (23%)            | 0 (0%)    | 316 (24%) | 5 (0%)   |
| DTP > MV                                          | 493               | 433                      | 67 (15%)             | 0 (0%)    | 73 (17%)  | 0 (0%)   |
| DTP, no MV                                        | 1816              | 1561                     | 569 (36%)            | 866 (55%) | 576 (37%) | 14 (1%)  |
| No DTP, no MV                                     | 547               | 516                      | 120 (23%)            | 102 (20%) | 118 (23%) | 78 (15%) |
| <b>18-35 months of age<br/>Vaccination status</b> |                   |                          |                      |           |           |          |
| DTP < MV                                          | 2415              | 2053                     | 18 (1%)              | 1 (0%)    | 38 (2%)   | 0 (0%)   |
| DTP = MV                                          | 2065              | 1726                     | 150 (9%)             | 0 (0%)    | 156 (9%)  | 2 (0%)   |
| DTP > MV                                          | 1940              | 1648                     | 75 (5%)              | 0 (0%)    | 82 (5%)   | 1 (0%)   |
| DTP, no MV                                        | 580               | 429                      | 77 (18%)             | 104 (24%) | 79 (18%)  | 0 (0%)   |
| No DTP, no MV                                     | 502               | 462                      | 24 (5%)              | 19 (4%)   | 23 (5%)   | 13 (3%)  |

1  
 2 **Supplementary table 4 - Mortality of children, who had received 3 doses of DTP, visited between 9 and 17 months of age according to**  
 3  
 4 **vaccination group**

| Vaccination status                          | Observations<br>N | MR per 1000<br>PYRS<br>(deaths/PYRS) | MRR<br>(95% CI)         | Boys              |                                      |                  | Girls             |                                      |                          |
|---------------------------------------------|-------------------|--------------------------------------|-------------------------|-------------------|--------------------------------------|------------------|-------------------|--------------------------------------|--------------------------|
|                                             |                   |                                      |                         | Observations<br>N | MR per 1000<br>PYRS<br>(deaths/PYRS) | MRR<br>(95% CI)  | Observations<br>N | MR per 1000<br>PYRS<br>(deaths/PYRS) | MRR<br>(95% CI)          |
| DTP3 < MV                                   | 1492              | 30.4 (14/460)                        | Ref                     | 774               | 37.7 (9/239)                         | Ref              | 718               | 22.6 (5/221)                         | Ref                      |
| DTP3 = MV                                   | 882               | 49.6 (13/262)                        | 2.07 (0.88-4.86)        | 422               | 64.5 (8/124)                         | 1.77 (0.61-5.15) | 460               | 36.3 (5/138)                         | 2.64 (0.65-10.73)        |
| DTP3 > MV                                   | 363               | 35.8 (3/84)                          | 1.27 (0.33-4.81)        | 191               | 23.2 (1/43)                          | 0.76 (0.09-6.43) | 172               | 49.1 (2/41)                          | 2.09 (0.34-12.86)        |
| DTP3, no MV                                 | 634               | 78.4 (20/255)                        | <b>3.01 (1.42-6.34)</b> | 334               | 88.1 (12/136)                        | 2.56 (0.97-6.74) | 300               | 67.4 (8/119)                         | <b>3.80 (1.17-12.33)</b> |
| Out-of-sequence<br>vaccinations<br>combined |                   |                                      |                         |                   |                                      |                  |                   |                                      |                          |
| DTP3>=MV                                    | 1245              | 46.3 (16/346)                        | 1.85 (0.82-4.16)        | 613               | 53.8 (9/167)                         | 1.53 (0.54-4.29) | 632               | 39.2 (7/179)                         | 2.46 (0.67-9.09)         |

20 Note: Mortality rate ratios were calculated using Cox proportional hazards models with age as underlying time, stratified by sex and village cluster

Review only

## STROBE Statement—checklist of items that should be included in reports of observational studies

|                              | Item No. | Recommendation                                                                                                                                                                             | Page No. | Relevant text from manuscript |
|------------------------------|----------|--------------------------------------------------------------------------------------------------------------------------------------------------------------------------------------------|----------|-------------------------------|
| <b>Title and abstract</b>    | 1        | (a) Indicate the study's design with a commonly used term in the title or the abstract                                                                                                     | 1        |                               |
|                              |          | (b) Provide in the abstract an informative and balanced summary of what was done and what was found                                                                                        | 3        |                               |
| <b>Introduction</b>          |          |                                                                                                                                                                                            |          |                               |
| Background/rationale         | 2        | Explain the scientific background and rationale for the investigation being reported                                                                                                       | 4-5      |                               |
| Objectives                   | 3        | State specific objectives, including any prespecified hypotheses                                                                                                                           | 5        |                               |
| <b>Methods</b>               |          |                                                                                                                                                                                            |          |                               |
| Study design                 | 4        | Present key elements of study design early in the paper                                                                                                                                    | 5-6      |                               |
| Setting                      | 5        | Describe the setting, locations, and relevant dates, including periods of recruitment, exposure, follow-up, and data collection                                                            | 5        |                               |
| Participants                 | 6        | (a) <i>Cohort study</i> —Give the eligibility criteria, and the sources and methods of selection of participants. Describe methods of follow-up                                            | 6        |                               |
|                              |          | <i>Case-control study</i> —Give the eligibility criteria, and the sources and methods of case ascertainment and control selection. Give the rationale for the choice of cases and controls |          |                               |
|                              |          | <i>Cross-sectional study</i> —Give the eligibility criteria, and the sources and methods of selection of participants                                                                      |          |                               |
|                              |          | (b) <i>Cohort study</i> —For matched studies, give matching criteria and number of exposed and unexposed                                                                                   |          |                               |
|                              |          | <i>Case-control study</i> —For matched studies, give matching criteria and the number of controls per case                                                                                 |          |                               |
| Variables                    | 7        | Clearly define all outcomes, exposures, predictors, potential confounders, and effect modifiers. Give diagnostic criteria, if applicable                                                   | 6        |                               |
| Data sources/<br>measurement | 8*       | For each variable of interest, give sources of data and details of methods of assessment (measurement). Describe comparability of assessment methods if there is more than one group       | 5        |                               |
| Bias                         | 9        | Describe any efforts to address potential sources of bias                                                                                                                                  | 7        |                               |
| Study size                   | 10       | Explain how the study size was arrived at                                                                                                                                                  | 8        |                               |

Continued on next page

1  
2  
3  
4  
5  
6  
7  
8  
9  
10  
11  
12  
13  
14  
15  
16  
17  
18  
19  
20  
21  
22  
23  
24  
25  
26  
27  
28  
29  
30  
31  
32  
33  
34  
35  
36  
37  
38  
39  
40  
41  
42  
43  
44  
45  
46  
47

|                        |     |                                                                                                                                                                                                                                                                                                           |             |
|------------------------|-----|-----------------------------------------------------------------------------------------------------------------------------------------------------------------------------------------------------------------------------------------------------------------------------------------------------------|-------------|
| Quantitative variables | 11  | Explain how quantitative variables were handled in the analyses. If applicable, describe which groupings were chosen and why                                                                                                                                                                              | 6-7         |
| Statistical methods    | 12  | (a) Describe all statistical methods, including those used to control for confounding                                                                                                                                                                                                                     | 6-7         |
|                        |     | (b) Describe any methods used to examine subgroups and interactions                                                                                                                                                                                                                                       | 7           |
|                        |     | (c) Explain how missing data were addressed                                                                                                                                                                                                                                                               |             |
|                        |     | (d) <i>Cohort study</i> —If applicable, explain how loss to follow-up was addressed<br><i>Case-control study</i> —If applicable, explain how matching of cases and controls was addressed<br><i>Cross-sectional study</i> —If applicable, describe analytical methods taking account of sampling strategy |             |
|                        |     | (e) Describe any sensitivity analyses                                                                                                                                                                                                                                                                     | 7           |
| <b>Results</b>         |     |                                                                                                                                                                                                                                                                                                           |             |
| Participants           | 13* | (a) Report numbers of individuals at each stage of study—eg numbers potentially eligible, examined for eligibility, confirmed eligible, included in the study, completing follow-up, and analysed                                                                                                         | 8           |
|                        |     | (b) Give reasons for non-participation at each stage                                                                                                                                                                                                                                                      | Figure 1    |
|                        |     | (c) Consider use of a flow diagram                                                                                                                                                                                                                                                                        | Figure 1    |
| Descriptive data       | 14* | (a) Give characteristics of study participants (eg demographic, clinical, social) and information on exposures and potential confounders                                                                                                                                                                  | 8 + table 1 |
|                        |     | (b) Indicate number of participants with missing data for each variable of interest                                                                                                                                                                                                                       | Table 1     |
|                        |     | (c) <i>Cohort study</i> —Summarise follow-up time (eg, average and total amount)                                                                                                                                                                                                                          | Table 2     |
| Outcome data           | 15* | <i>Cohort study</i> —Report numbers of outcome events or summary measures over time                                                                                                                                                                                                                       | Table 2     |
|                        |     | <i>Case-control study</i> —Report numbers in each exposure category, or summary measures of exposure                                                                                                                                                                                                      |             |
|                        |     | <i>Cross-sectional study</i> —Report numbers of outcome events or summary measures                                                                                                                                                                                                                        |             |
| Main results           | 16  | (a) Give unadjusted estimates and, if applicable, confounder-adjusted estimates and their precision (eg, 95% confidence interval). Make clear which confounders were adjusted for and why they were included                                                                                              | 8 + Table 2 |
|                        |     | (b) Report category boundaries when continuous variables were categorized                                                                                                                                                                                                                                 | Table 1     |
|                        |     | (c) If relevant, consider translating estimates of relative risk into absolute risk for a meaningful time period                                                                                                                                                                                          |             |

Continued on next page



|                          |    |                                                                                                                                                                            |                                 |
|--------------------------|----|----------------------------------------------------------------------------------------------------------------------------------------------------------------------------|---------------------------------|
| Other analyses           | 17 | Report other analyses done—eg analyses of subgroups and interactions, and sensitivity analyses                                                                             | 9 + Table 3<br>+ Supp<br>tables |
| <b>Discussion</b>        |    |                                                                                                                                                                            |                                 |
| Key results              | 18 | Summarise key results with reference to study objectives                                                                                                                   | 9                               |
| Limitations              | 19 | Discuss limitations of the study, taking into account sources of potential bias or imprecision. Discuss both direction and magnitude of any potential bias                 | 10                              |
| Interpretation           | 20 | Give a cautious overall interpretation of results considering objectives, limitations, multiplicity of analyses, results from similar studies, and other relevant evidence | 11-12                           |
| Generalisability         | 21 | Discuss the generalisability (external validity) of the study results                                                                                                      | 10-12                           |
| <b>Other information</b> |    |                                                                                                                                                                            |                                 |
| Funding                  | 22 | Give the source of funding and the role of the funders for the present study and, if applicable, for the original study on which the present article is based              | 13                              |

\*Give information separately for cases and controls in case-control studies and, if applicable, for exposed and unexposed groups in cohort and cross-sectional studies.

**Note:** An Explanation and Elaboration article discusses each checklist item and gives methodological background and published examples of transparent reporting. The STROBE checklist is best used in conjunction with this article (freely available on the Web sites of PLoS Medicine at <http://www.plosmedicine.org/>, Annals of Internal Medicine at <http://www.annals.org/>, and Epidemiology at <http://www.epidem.com/>). Information on the STROBE Initiative is available at [www.strobe-statement.org](http://www.strobe-statement.org).
