# Supplementary material for: Out-of-sequence DTP and measles vaccinations and child mortality in Guinea-Bissau: a reanalysis
Source: PubMed Central journal article supplement — BMJ Open. 2019 Sep 5;9(9):e024893. doi: 10.1136/bmjopen-2018-024893 (PMC6731924; doi:10.1136/bmjopen-2018-024893), 2019-09-05
Supplement: bmjopen-2018-024893supp001.pdf [file bmjopen-2018-024893supp001.pdf]

**Supplementary table 1 - Baseline characteristics among children included and excluded from the analyses**

|                                                                         | Included           | Excluded           | p-value |
|-------------------------------------------------------------------------|--------------------|--------------------|---------|
| Numbers (%)                                                             | 5937 (57)          | 4519 (43)          |         |
| <b>Sex</b>                                                              |                    |                    | .11     |
| Male (%)                                                                | 3039 (51)          | 2242 (50)          |         |
| Female (%)                                                              | 2898 (49)          | 2277 (50)          |         |
| <b>Median age in months at start of follow-up (interquartile range)</b> | 13.1 (11.0 – 15.5) | 13.4 (11.1 – 15.7) | 0.0005  |
| <b>MUAC at start of Follow-up<sup>1</sup></b>                           | -1.06 (1.1)        | -1.09 (1.12)       | .42     |
| <b>Region</b>                                                           |                    |                    | <0.0001 |
| Oio                                                                     | 1307 (22)          | 969 (21)           |         |
| Biombo                                                                  | 1329 (22)          | 1380 (31)          |         |
| Gabu                                                                    | 1350 (23)          | 803 (18)           |         |
| Cacheu                                                                  | 787 (13)           | 692 (15)           |         |
| Bafata                                                                  | 1164 (20)          | 675 (15)           |         |
| <b>Ethnicity<sup>2</sup></b>                                            |                    |                    | <0.0001 |
| Balanta                                                                 | 937 (16)           | 926 (21)           |         |
| Pepel                                                                   | 1117 (19)          | 1172 (26)          |         |
| Fula/Mandinca                                                           | 3053 (52)          | 1728 (39)          |         |
| Manjaco                                                                 | 265 (5)            | 270 (6)            |         |
| Other                                                                   | 501 (9)            | 369 (8)            |         |
| <b>Median maternal age in years (interquartile range)<sup>3</sup></b>   | 26 (20.9 - 30.8)   | 25.3 (20.4 - 30)   | <0.0001 |
| <b>Education of caretaker<sup>4</sup></b>                               |                    |                    | 0.95    |
| 0 years                                                                 | 5065 (85)          | 3805 (84)          |         |
| 1-4 years                                                               | 616 (10)           | 472 (10)           |         |
| >4 years                                                                | 146 (2)            | 111 (2)            |         |

<sup>1</sup> 3731 observations with missing MUAC

<sup>2</sup> 118 observations with missing information on ethnicity

<sup>3</sup> 116 observations with missing information on maternal age

<sup>4</sup> 241 observations with missing information on education of caretaker

Supplementary table 2 - Mortality of children visited between 18 and 35 months of age according to vaccination group

| Vaccination status                          | Observations<br>N | MR per 1000<br>PYRS<br>(deaths/PYRS) | MRR<br>(95% CI)         | Boys              |                                      |                  | Girls             |                                      |                         |
|---------------------------------------------|-------------------|--------------------------------------|-------------------------|-------------------|--------------------------------------|------------------|-------------------|--------------------------------------|-------------------------|
|                                             |                   |                                      |                         | Observations<br>N | MR per 1000<br>PYRS<br>(deaths/PYRS) | MRR<br>(95% CI)  | Observations<br>N | MR per 1000<br>PYRS<br>(deaths/PYRS) | MRR<br>(95% CI)         |
| DTP < MV                                    | 2415              | 39.9 (46/1154)                       | Ref                     | 1249              | 45.2 (27/598)                        | Ref              | 1166              | 34.1 (19/557)                        | Ref                     |
| DTP = MV                                    | 2065              | 47.0 (46/978)                        | 0.98 (0.62-1.54)        | 1031              | 57.5 (28/487)                        | 1.06 (0.59-1.92) | 1034              | 36.7 (18/491)                        | 0.85 (0.42-1.71)        |
| DTP > MV                                    | 1940              | 31.3 (29/927)                        | 0.62 (0.36-1.06)        | 954               | 41.4 (19/458)                        | 0.83 (0.42-1.63) | 986               | 21.3 (10/469)                        | <b>0.39 (0.16-0.94)</b> |
| DTP, no MV                                  | 580               | 65.9 (18/273)                        | 1.40 (0.77-2.55)        | 278               | 76.2 (10/131)                        | 1.39 (0.63-3.05) | 302               | 56.3 (8/142)                         | 1.37 (0.55-3.42)        |
| No DTP, no MV                               | 502               | 112.0 (26/232)                       | <b>2.18 (1.21-3.90)</b> | 238               | 71.0 (8/113)                         | 1.58 (0.64-3.91) | 264               | 150.8 (18/119)                       | <b>2.68 (1.21-5.94)</b> |
| Out-of-sequence<br>vaccinations<br>combined |                   |                                      |                         |                   |                                      |                  |                   |                                      |                         |
| DTP ≥ MV                                    | 4005              | 39.4 (75/1,905)                      | 0.82 (0.54-1.24)        | 1985              | 49.7 (47/946)                        | 0.96 (0.56-1.67) | 2020              | 29.2 (28/960)                        | 0.64 (0.33-1.24)        |

Note: Mortality rate ratios were calculated using Cox proportional hazards models with age as underlying time, stratified by sex and village cluster.

**Supplementary table 3 - Registered vaccinations during follow-up (FU) period among those with vaccination status assessed again**

|                                                   | Observations<br>N | Seen card<br>after visit | Vaccinated during FU |           |           |          |
|---------------------------------------------------|-------------------|--------------------------|----------------------|-----------|-----------|----------|
|                                                   |                   |                          | DTP                  | MV        | Polio     | BCG      |
| <b>9-17 months of age<br/>Vaccination status</b>  |                   |                          |                      |           |           |          |
| DTP < MV                                          | 1590              | 1427                     | 31 (2%)              | 0 (0%)    | 51 (4%)   | 3 (0%)   |
| DTP = MV                                          | 1491              | 1324                     | 310 (23%)            | 0 (0%)    | 316 (24%) | 5 (0%)   |
| DTP > MV                                          | 493               | 433                      | 67 (15%)             | 0 (0%)    | 73 (17%)  | 0 (0%)   |
| DTP, no MV                                        | 1816              | 1561                     | 569 (36%)            | 866 (55%) | 576 (37%) | 14 (1%)  |
| No DTP, no MV                                     | 547               | 516                      | 120 (23%)            | 102 (20%) | 118 (23%) | 78 (15%) |
| <b>18-35 months of age<br/>Vaccination status</b> |                   |                          |                      |           |           |          |
| DTP < MV                                          | 2415              | 2053                     | 18 (1%)              | 1 (0%)    | 38 (2%)   | 0 (0%)   |
| DTP = MV                                          | 2065              | 1726                     | 150 (9%)             | 0 (0%)    | 156 (9%)  | 2 (0%)   |
| DTP > MV                                          | 1940              | 1648                     | 75 (5%)              | 0 (0%)    | 82 (5%)   | 1 (0%)   |
| DTP, no MV                                        | 580               | 429                      | 77 (18%)             | 104 (24%) | 79 (18%)  | 0 (0%)   |
| No DTP, no MV                                     | 502               | 462                      | 24 (5%)              | 19 (4%)   | 23 (5%)   | 13 (3%)  |

**Supplementary table 4 - Mortality of children, who had received 3 doses of DTP, visited between 9 and 17 months of age according to vaccination group**

| Vaccination status                          | Observations<br>N | MR per 1000<br>PYRS<br>(deaths/PYRS) | MRR<br>(95% CI)         | Boys              |                                      |                  | Girls             |                                      |                          |
|---------------------------------------------|-------------------|--------------------------------------|-------------------------|-------------------|--------------------------------------|------------------|-------------------|--------------------------------------|--------------------------|
|                                             |                   |                                      |                         | Observations<br>N | MR per 1000<br>PYRS<br>(deaths/PYRS) | MRR<br>(95% CI)  | Observations<br>N | MR per 1000<br>PYRS<br>(deaths/PYRS) | MRR<br>(95% CI)          |
| DTP3 < MV                                   | 1492              | 30.4 (14/460)                        | Ref                     | 774               | 37.7 (9/239)                         | Ref              | 718               | 22.6 (5/221)                         | Ref                      |
| DTP3 = MV                                   | 882               | 49.6 (13/262)                        | 2.07 (0.88-4.86)        | 422               | 64.5 (8/124)                         | 1.77 (0.61-5.15) | 460               | 36.3 (5/138)                         | 2.64 (0.65-10.73)        |
| DTP3 > MV                                   | 363               | 35.8 (3/84)                          | 1.27 (0.33-4.81)        | 191               | 23.2 (1/43)                          | 0.76 (0.09-6.43) | 172               | 49.1 (2/41)                          | 2.09 (0.34-12.86)        |
| DTP3, no MV                                 | 634               | 78.4 (20/255)                        | <b>3.01 (1.42-6.34)</b> | 334               | 88.1 (12/136)                        | 2.56 (0.97-6.74) | 300               | 67.4 (8/119)                         | <b>3.80 (1.17-12.33)</b> |
| Out-of-sequence<br>vaccinations<br>combined |                   |                                      |                         |                   |                                      |                  |                   |                                      |                          |
| DTP3>=MV                                    | 1245              | 46.3 (16/346)                        | 1.85 (0.82-4.16)        | 613               | 53.8 (9/167)                         | 1.53 (0.54-4.29) | 632               | 39.2 (7/179)                         | 2.46 (0.67-9.09)         |

Note: Mortality rate ratios were calculated using Cox proportional hazards models with age as underlying time, stratified by sex and village cluster
